# Supplementary material
Source: PubMed Central journal article supplement (PMC9941124)
Supplement: 41467_2023_36234_MOESM1_ESM.pdf [file 41467_2023_36234_MOESM1_ESM.pdf]

## Supplementary Information

### **Amyloidogenic proteins in the SARS-CoV & SARS-CoV-2 proteomes**

Taniya Bhardwaj<sup>1</sup>, Kundlik Gadhave<sup>1</sup>, Shivani K Kapuganti<sup>1</sup>, Prateek Kumar<sup>1</sup>, Zacharias Faidon Brotzakis<sup>2</sup>, Kumar Udit Saumya<sup>1</sup>, Namyashree Nayak<sup>1</sup>, Ankur Kumar<sup>1</sup>, Richa Joshi<sup>1</sup>, Bodhidipra Mukherjee<sup>1</sup>, Aparna Bhardwaj<sup>1</sup>, Krishan Gopal Thakur<sup>3</sup>, Neha Garg<sup>4</sup>, Michele Vendruscolo<sup>2</sup>, Rajanish Giri<sup>1\*</sup>

<sup>1</sup>*School of Biosciences and Bioengineering, Indian Institute of Technology Mandi, Kamand, Himachal Pradesh, 175075, India.*

<sup>2</sup>*Centre for Misfolding Diseases, Yusuf Hamied Department of Chemistry, University of Cambridge, Cambridge CB2 1EW, UK*

<sup>3</sup>*Structural Biology Laboratory, G. N. Ramachandran Protein Centre, CSIR-Institute of Microbial Technology, Chandigarh, 160036, India.*

<sup>4</sup>*Department of Medicinal Chemistry, Faculty of Ayurveda, Institute of Medical Sciences, Banaras Hindu University, Varanasi, Uttar Pradesh, 221005, India.*

### Supplementary tables:

**Supplementary table 1:** Distribution of APRs in SARS-CoV-2 structural proteins.

| <b>SARS-CoV-2 protein (length in amino acids) (NCBI/Uniprot accession ID)</b> | <b>MetAmyl (% of APRs)</b>                                                                                | <b>FISH Amyloid (% of APRs)</b>                                            | <b>AGGRESCAN (% of APRs)</b>                                                                                  | <b>FoldAmyloid (% of APRs)</b>                                                     | <b>CamSol (% of hydrophobicity)</b>                                                                         |
|-------------------------------------------------------------------------------|-----------------------------------------------------------------------------------------------------------|----------------------------------------------------------------------------|---------------------------------------------------------------------------------------------------------------|------------------------------------------------------------------------------------|-------------------------------------------------------------------------------------------------------------|
| <b>Spike glycoprotein</b> (1273) (YP_009724390.1)                             | 1-20, 28-33, 42-52, 58-73, 88-97, 105-110, 114-121, 124-132, 139-145, 166-176, 192-205, 226-236, 262-272, | 35-39, 54-58, 89-93, 116-120, 125-129, 139-146, 167-171, 179-183, 200-204, | 1-8, 10-16, 31-38, 40-47, 50-56, 58-70, 86-91, 100-109, 114-133, 140-145, 162-167, 189-208, 231-247, 260-271, | 1-10, 34-38, 53-69, 100-108, 116-120, 126-135, 141-146, 174-178, 190-195, 235-244, | 1-10, 55-68, 117-121, 125-134, 263-269, 431-436, 487-492, 508-516, 540-544, 592-598, 608-613, 692-698, 717- |

|                                                                                                                                                                                                                                                                                                                                                                                                                                      |                                                                                                                                                                                                                                                                         |                                                                                                                                                                                                                                                                                                                                                                |                                                                                                                                                                                                                                                                                                             |                                                                                                                   |
|--------------------------------------------------------------------------------------------------------------------------------------------------------------------------------------------------------------------------------------------------------------------------------------------------------------------------------------------------------------------------------------------------------------------------------------|-------------------------------------------------------------------------------------------------------------------------------------------------------------------------------------------------------------------------------------------------------------------------|----------------------------------------------------------------------------------------------------------------------------------------------------------------------------------------------------------------------------------------------------------------------------------------------------------------------------------------------------------------|-------------------------------------------------------------------------------------------------------------------------------------------------------------------------------------------------------------------------------------------------------------------------------------------------------------|-------------------------------------------------------------------------------------------------------------------|
| 284-289, 302-308, 311-336, 347-352, 357-384, 390-409, 428-437, 443-448, 472-477, 495-500, 507-517, 523-528, 534-544, 546-554, 583-600, 605-622, 635-645, 651-660, 670-675, 687-697, 703-708, 717-727, 729-744, 756-763, 767-772, 776-786, 801-806, 822-830, 855-861, 869-875, 879-885, 906-918, 939-944, 947-952, 958-963, 969-981, 991-998, 1003-1013, 1029-1037, 1056-1071, 1075-1081, 1092-1107, 1119-1137, 1159-1164, 1171-1181, | 266-270, 325-329, 365-370, 373-377, 399-403, 406-410, 446-450, 469-473, 482-486, 502-506, 540-544, 550-554, 558-562, 591-599, 609-613, 689-693, 783-789, 822-826, 914-918, 953-957, 1001-1005, 1059-1068, 1127-1132, 1175-1180, 1206-1210, 1228-1232<br><b>(15.47%)</b> | 303-311, 331-336, 338-354, 362-383, 390-400, 428-437, 448-457, 484-490, 508-520, 584-588, 590-599, 610-617, 666-671, 688-698, 716-727, 729-745, 751-759, 761-768, 783-787, 797-805, 817-833, 853-861, 864-870, 872-896, 898-914, 961-982, 1000-1013, 1044-1052, 1058-1068, 1097-1101, 1124-1137, 1171-1179, 1207-1212, 1214-1249, 1266-1273<br><b>(45.01%)</b> | 264-269, 274-278, 327-331, 348-353, 366-370, 389-395, 431-436, 450-457, 487-492, 507-519, 539-543, 560-564, 582-586, 609-613, 691-697, 718-722, 738-743, 751-755, 780-784, 799-804, 819-825, 875-880, 894-907, 993-999, 1005-1014, 1047-1051, 1060-1067, 1101-1105, 1127-1132, 1210-1239<br><b>(23.72%)</b> | 724, 738-742, 752-761, 884-889, 895-899, 1004-1010, 1059-1068, 1101-1106, 1127-1135, 1211-1242<br><b>(15.16%)</b> |
|--------------------------------------------------------------------------------------------------------------------------------------------------------------------------------------------------------------------------------------------------------------------------------------------------------------------------------------------------------------------------------------------------------------------------------------|-------------------------------------------------------------------------------------------------------------------------------------------------------------------------------------------------------------------------------------------------------------------------|----------------------------------------------------------------------------------------------------------------------------------------------------------------------------------------------------------------------------------------------------------------------------------------------------------------------------------------------------------------|-------------------------------------------------------------------------------------------------------------------------------------------------------------------------------------------------------------------------------------------------------------------------------------------------------------|-------------------------------------------------------------------------------------------------------------------|

|                                                  |                                                                                                                                    |                                                                                     |                                                                                                     |                                                                                                                                       |                                                                   |
|--------------------------------------------------|------------------------------------------------------------------------------------------------------------------------------------|-------------------------------------------------------------------------------------|-----------------------------------------------------------------------------------------------------|---------------------------------------------------------------------------------------------------------------------------------------|-------------------------------------------------------------------|
|                                                  | 1221-1255,<br>1236-1273<br><b>(51.76%)</b>                                                                                         |                                                                                     |                                                                                                     |                                                                                                                                       |                                                                   |
| <b>Envelope</b> (75)<br>(YP_009724392.1)         | 1-6, 9-63<br><b>(81.3%)</b>                                                                                                        | 10-14,<br>16-23,<br>25-29,<br>55-59<br><b>(30.66%)</b>                              | 1-6, 11-53, 55-61<br><b>(74.67%)</b>                                                                | 11-51, 56-60<br><b>(61.34%)</b>                                                                                                       | 12-34, 39-50,<br>54-59<br><b>(54.6%)</b>                          |
| <b>Membrane</b> (222)<br>(YP_009724393.1)        | 5-10, 21-40,<br>43-52, 60-82,<br>92-102, 118-123,<br>136-145,<br>167-173, 187-197,<br>208-213,<br>216-222<br><b>(52.7%)</b>        | 25-29,<br>44-56,<br>69-73,<br>99-103,<br>108-112,<br>201-205<br><b>(17.11%)</b>     | 19-38, 43-58,<br>60-108, 118-122,<br>124-131,<br>135-149, 171-181,<br>216-222<br><b>(59%)</b>       | 18-39, 44-60,<br>62-77, 81-105,<br>108-112,<br>118-122,<br>126-132,<br>138-147,<br>176-180,<br>197-202,<br>218-222<br><b>(57.65%)</b> | 21-38, 46-79,<br>81-100<br><b>(32.4%)</b>                         |
| <b>Nucleocapsid</b><br>(419)<br>(YP_009724391.1) | 12-17, 49-58,<br>108-113, 128-135,<br>154-162,<br>241-251, 265-275,<br>332-337,<br>346-355, 387-396,<br>412-417<br><b>(22.19%)</b> | 70-75,<br>159-163,<br>238-244,<br>348-352,<br>385-389,<br>405-409<br><b>(7.87%)</b> | 49-56, 107-116,<br>126-137,<br>156-161, 218-226,<br>310-322,<br>327-336, 348-356<br><b>(18.37%)</b> | 51-55, 85-89,<br>106-113,<br>130-134,<br>156-160,<br>219-226,<br>313-317,<br>329-333,<br>350-355,<br>392-396<br><b>(13.6%)</b>        | 51-56, 107-113,<br>131-134, 156-160,<br>330-334<br><b>(5.48%)</b> |

**Supplementary table 2:** Distribution of APRs in SARS-CoV-2 accessory proteins.

| SARS-CoV-2 protein (length in | MetAmyl | FISH Amyloid | AGGREGSCAN (% of APRs) | FoldAmyloid (% of APRs) | CamSol (% of APRs) |
|-------------------------------|---------|--------------|------------------------|-------------------------|--------------------|
|-------------------------------|---------|--------------|------------------------|-------------------------|--------------------|

| <b>amino acids)<br/>(NCBI accession<br/>ID)</b> | <b>(% of<br/>APRs)</b>                                                                                                                                                                | <b>(% of<br/>APRs)</b>                                                                                                      |                                                                                                                 |                                                                                                                                        |                                                                                                                        |
|-------------------------------------------------|---------------------------------------------------------------------------------------------------------------------------------------------------------------------------------------|-----------------------------------------------------------------------------------------------------------------------------|-----------------------------------------------------------------------------------------------------------------|----------------------------------------------------------------------------------------------------------------------------------------|------------------------------------------------------------------------------------------------------------------------|
| <b>ORF3a</b> (275)<br>(YP_009724397.2)          | 6-17, 31-36,<br>43-67, 72-<br>97, 109-<br>125, 153-<br>158, 160-<br>172, 185-<br>191, 196-<br>207, 211-<br>216, 220-<br>237, 243-<br>249, 251-<br>260, 268-<br>275,<br><b>(62.9%)</b> | 44-53, 76-<br>80, 86-90,<br>109-117,<br>119-125,<br>142-146,<br>166-170,<br>212-216,<br>224-233,<br>254-258<br><b>(24%)</b> | 1-14, 31-35,<br>37-41, 43-67,<br>73-103, 105-<br>132, 141-158,<br>160-171, 197-<br>218, 227-236<br><b>(80%)</b> | 1-10, 43-57,<br>77-97, 103-<br>116, 118-133,<br>139-152,<br>154-159,<br>201-210,<br>212-217,<br>228-235,<br>244-248<br><b>(45.45%)</b> | 5-13, 42-57, 78-<br>98, 106-118,<br>127-131, 143-<br>151, 165-169,<br>202-206, 213-<br>217, 227-234<br><b>(27.63%)</b> |
| <b>ORF3b</b> (22)<br>(P0DTF1)                   | 8-22<br><b>(68.18%)</b>                                                                                                                                                               | 9-17<br><b>(40.9%)</b>                                                                                                      | 4-22<br><b>(86.36%)</b>                                                                                         | 1-22<br><b>(100%)</b>                                                                                                                  | 2-22<br><b>(95.4%)</b>                                                                                                 |
| <b>ORF6</b> (61)<br>(YP_009724394.1)            | 4-41<br><b>(62.29%)</b>                                                                                                                                                               | 7-11, 14-19,<br>28-37<br><b>(34.4%)</b>                                                                                     | 1-39<br><b>(63.93%)</b>                                                                                         | 1-10, 12-22,<br>24-38<br><b>(59.01%)</b>                                                                                               | 1-21, 24-35<br><b>(54.09%)</b>                                                                                         |
| <b>ORF7a</b> (121)<br>(YP_009724395.1)          | 3-15, 23-32,<br>35-40, 55-<br>66, 69-77,<br>93-115<br><b>(60.33%)</b>                                                                                                                 | 5-9, 17-21,<br>100-111<br><b>(18.18%)</b>                                                                                   | 1-18, 26-33,<br>55-66, 100-116<br><b>(45.45%)</b>                                                               | 1-13, 16-22,<br>54-61, 73-77,<br>98-116<br><b>(42.97%)</b>                                                                             | 1-13, 56-66, 99-<br>114<br><b>(33.05%)</b>                                                                             |
| <b>ORF7b</b> (43)<br>(YP_009725296.1)           | 2-12, 18-31<br><b>(58.1%)</b>                                                                                                                                                         | 12-28<br><b>(39.53%)</b>                                                                                                    | 1-32<br><b>(74.41%)</b>                                                                                         | 1-32<br><b>(74.41%)</b>                                                                                                                | 7-32<br><b>(60.46%)</b>                                                                                                |

|                                       |                                                                                               |                                           |                                                                         |                                                                        |                                            |
|---------------------------------------|-----------------------------------------------------------------------------------------------|-------------------------------------------|-------------------------------------------------------------------------|------------------------------------------------------------------------|--------------------------------------------|
| <b>ORF8</b> (121)<br>(YP_009724396.1) | 1-17, 20-33,<br>37-42, 46-<br>51, 57-67,<br>71-91, 95-<br>105, 113-<br>121<br><b>(78.51%)</b> | 2-10, 76-80,<br>107-111<br><b>(15.7%)</b> | 1-15, 39-49,<br>57-61, 71-84,<br>96-103, 114-<br>121<br><b>(50.41%)</b> | 1-12, 39-49,<br>58-62, 81-88,<br>97-104, 113-<br>121<br><b>(43.8%)</b> | 1-15, 78-88,<br>117-121<br><b>(25.61%)</b> |
| <b>ORF9b</b> (97)<br>(P0DTD2)         | 18-24, 30-<br>35, 37-47,<br>71-80, 89-<br>97<br><b>(44.32%)</b>                               | 40-45<br><b>(6.18%)</b>                   | 20-24, 44-50,<br>74-79, 90-97<br><b>(26.8%)</b>                         | 20-25, 42-48,<br>69-73, 91-95<br><b>(23.71%)</b>                       | 71-76, 92-97<br><b>(12.37%)</b>            |
| <b>ORF10</b> (38)<br>(YP_009724396.1) | 2-8, 11-18,<br>25-38<br><b>(76.3%)</b>                                                        | 23-27, 31-<br>35<br><b>(23.68%)</b>       | 1-9, 11-20, 25-<br>38<br><b>(86.84%)</b>                                | 1-20, 31-37<br><b>(71.05%)</b>                                         | 1-20, 32-38<br><b>(63.15%)</b>             |
| <b>ORF14</b> (73)<br>(P0DTD3)         | 3-9, 27-42,<br>49-54, 65-<br>73<br><b>(52%)</b>                                               | 39-44<br><b>(8.21%)</b>                   | 34-39, 50-71<br><b>(38.35%)</b>                                         | 29-38, 51-72<br><b>(43.83%)</b>                                        | 2-7, 33-40, 59-<br>72<br><b>(38.35%)</b>   |

**Supplementary table 3:** Distribution of APRs in SARS-CoV-2 non-structural proteins.

| <b>SARS-CoV-2<br/>protein (length in<br/>amino acids)<br/>(NCBI accession<br/>ID)</b> | <b>MetAmyl<br/>(% of APRs)</b>                        | <b>FISH<br/>Amyloid<br/>(% of APRs)</b>     | <b>AGGRESCAN<br/>(% of APRs)</b>                  | <b>FoldAmyloid<br/>(% of APRs)</b>                     | <b>CamSol<br/>(% of<br/>APRs)</b>   |
|---------------------------------------------------------------------------------------|-------------------------------------------------------|---------------------------------------------|---------------------------------------------------|--------------------------------------------------------|-------------------------------------|
| <b>NSP1</b> (180)<br>(YP_009725297.1)                                                 | 10-31, 50-61,<br>66-74, 84-89,<br>101-111,<br>114-119 | 59-66, 92-96,<br>105-114<br><b>(12.77%)</b> | 1-5, 20-31, 52-<br>58, 68-72, 84-<br>93, 103-108, | 18-22, 25-29,<br>68-72, 83-88,<br>105-109, 116-<br>124 | 15-20,<br>105-109<br><b>(6.11%)</b> |

|                                       |                                                                                                                                                                                                                          |                                                                                                   |                                                                                                                                                                                           |                                                                                                                                                                           |                                                                                                                             |
|---------------------------------------|--------------------------------------------------------------------------------------------------------------------------------------------------------------------------------------------------------------------------|---------------------------------------------------------------------------------------------------|-------------------------------------------------------------------------------------------------------------------------------------------------------------------------------------------|---------------------------------------------------------------------------------------------------------------------------------------------------------------------------|-----------------------------------------------------------------------------------------------------------------------------|
|                                       | <b>(36.66%)</b>                                                                                                                                                                                                          |                                                                                                   | 110-114, 116-122<br><b>(31.67%)</b>                                                                                                                                                       | <b>(19.44%)</b>                                                                                                                                                           |                                                                                                                             |
| <b>NSP2 (638)</b><br>(YP_009725298.1) | 46-53, 57-62, 94-105, 118-123, 134-139, 155-161, 182-193, 223-238, 248-263, 278-288, 292-313, 318-334, 339-344, 362-372, 378-401, 415-431, 433-442, 468-489, 492-503, 509-519, 525-535, 575-581, 598-608<br><b>(44%)</b> | 184-189, 257-261, 363-368, 424-428, 433-440, 458-462, 468-472, 494-498, 560-564<br><b>(7.83%)</b> | 78-82, 97-105, 118-124, 136-142, 158-162, 182-190, 225-241, 282-286, 291-315, 353-371, 382-445, 447-451, 463-487, 494-520, 524-528, 557-561, 571-576, 603-614, 625-632<br><b>(42.31%)</b> | 1-5, 48-52, 58-62, 92-96, 134-139, 186-191, 228-235, 241-245, 294-299, 362-370, 397-408, 415-421, 430-439, 460-464, 467-474, 496-501, 503-508, 603-612<br><b>(19.43%)</b> | 92-98, 123-128, 186-192, 226-235, 295-299, 351-355, 414-431, 434-439, 482-486, 496-500, 504-508, 602-608<br><b>(12.85%)</b> |

|                                                                            |                                                                                                                                                                                                                                                                                                                                                                                                                                                                |                                                                                                                                                                                                                                                                                                                                                                                                                                                       |                                                                                                                                                                                                                                                                                                                                                                                                                                                                                                                                                                                  |                                                                                                                                                                                                                                                                                                                                                                                                                                                                                                                                            |                                                                                                                                                                                                                                                                                                                                                                 |
|----------------------------------------------------------------------------|----------------------------------------------------------------------------------------------------------------------------------------------------------------------------------------------------------------------------------------------------------------------------------------------------------------------------------------------------------------------------------------------------------------------------------------------------------------|-------------------------------------------------------------------------------------------------------------------------------------------------------------------------------------------------------------------------------------------------------------------------------------------------------------------------------------------------------------------------------------------------------------------------------------------------------|----------------------------------------------------------------------------------------------------------------------------------------------------------------------------------------------------------------------------------------------------------------------------------------------------------------------------------------------------------------------------------------------------------------------------------------------------------------------------------------------------------------------------------------------------------------------------------|--------------------------------------------------------------------------------------------------------------------------------------------------------------------------------------------------------------------------------------------------------------------------------------------------------------------------------------------------------------------------------------------------------------------------------------------------------------------------------------------------------------------------------------------|-----------------------------------------------------------------------------------------------------------------------------------------------------------------------------------------------------------------------------------------------------------------------------------------------------------------------------------------------------------------|
| <p style="text-align: center;"><b>NSP3 (1945)</b><br/>(YP_009725299.1)</p> | 1-8, 10-17,<br>20-27, 39-48,<br>52-66, 102-<br>108, 144-<br>149, 166-<br>175, 179-<br>191, 198-<br>212, 220-<br>225, 234-<br>242, 272-<br>277, 279-<br>291, 295-<br>304, 331-<br>336, 341-<br>361, 367-<br>374, 393-<br>398, 417-<br>429, 434-<br>442, 451-<br>462, 467-<br>486, 504-<br>512, 516-<br>521, 526-<br>545, 548-<br>554, 570-<br>585, 593-<br>602, 604-<br>620, 633-<br>640, 652-<br>670, 682-<br>692, 702-<br>707, 715-<br>722, 730-<br>737, 745- | 10-14, 20-24,<br>201-205,<br>209-213,<br>218-222,<br>371-375,<br>379-383,<br>434-439,<br>452-456,<br>476-480,<br>504-508,<br>533-537,<br>580-584,<br>596-600,<br>716-720,<br>746-750,<br>755-760,<br>785-789,<br>823-827,<br>946-950,<br>964-968,<br>1010-1014,<br>1068-1072,<br>1106-1110,<br>1148-1153,<br>1253-1258,<br>1335-1339,<br>1396-1400,<br>1409-1413,<br>1423-1428,<br>1433-1437,<br>1456-1460,<br>1509-1513,<br>1518-1522,<br>1537-1541, | 16-23, 42-46,<br>51-66, 68-73,<br>82-89, 98-106,<br>185-189, 201-<br>219, 237-245,<br>248-252, 281-<br>291, 295-301,<br>330-339, 341-<br>365, 367-374,<br>417-421, 432-<br>442, 453-458,<br>461-465, 468-<br>483, 530-538,<br>550-558, 573-<br>580, 582-586,<br>600-618, 632-<br>637, 648-653,<br>667-672, 684-<br>689, 735-740,<br>742-758, 763-<br>771, 824-830,<br>843-848, 857-<br>868, 891-903,<br>912-916, 928-<br>935, 946-957,<br>986-991, 1029-<br>1034, 1045-<br>1050, 1062-<br>1071, 1107-<br>1112, 1137-<br>1142, 1152-<br>1157, 1172-<br>1177, 1188-<br>1199, 1252- | 83-90, 100-<br>106, 244-248,<br>294-299, 324-<br>329, 342-349,<br>353-359, 435-<br>440, 479-483,<br>506-510, 534-<br>540, 553-562,<br>602-608, 614-<br>619, 632-637,<br>646-650, 694-<br>698, 707-711,<br>748-755, 799-<br>803, 814-818,<br>825-830, 856-<br>866, 879-884,<br>891-899, 915-<br>919, 930-935,<br>959-954,<br>1108-1115,<br>1139-1143,<br>1172-1176,<br>1189-1197,<br>1255-1259,<br>1276-1281,<br>1337-1345,<br>1351-1364,<br>1409-1428,<br>1433-1437,<br>1458-1463,<br>1488-1494,<br>1496-1505,<br>1507-1555,<br>1561-1582, | 21-25, 41-<br>45, 53-59,<br>101-106,<br>199-205,<br>239-244,<br>534-540,<br>551-555,<br>604-608,<br>629-638,<br>752-756,<br>762-771,<br>858-865,<br>892-899,<br>915-920,<br>931-935,<br>1191-<br>1195,<br>1348-<br>1363,<br>1410-<br>1429,<br>1432-<br>1437,<br>1458-<br>1467,<br>1470-<br>1474,<br>1489-<br>1505,<br>1507-<br>1554,<br>1564-<br>1583,<br>1720- |
|----------------------------------------------------------------------------|----------------------------------------------------------------------------------------------------------------------------------------------------------------------------------------------------------------------------------------------------------------------------------------------------------------------------------------------------------------------------------------------------------------------------------------------------------------|-------------------------------------------------------------------------------------------------------------------------------------------------------------------------------------------------------------------------------------------------------------------------------------------------------------------------------------------------------------------------------------------------------------------------------------------------------|----------------------------------------------------------------------------------------------------------------------------------------------------------------------------------------------------------------------------------------------------------------------------------------------------------------------------------------------------------------------------------------------------------------------------------------------------------------------------------------------------------------------------------------------------------------------------------|--------------------------------------------------------------------------------------------------------------------------------------------------------------------------------------------------------------------------------------------------------------------------------------------------------------------------------------------------------------------------------------------------------------------------------------------------------------------------------------------------------------------------------------------|-----------------------------------------------------------------------------------------------------------------------------------------------------------------------------------------------------------------------------------------------------------------------------------------------------------------------------------------------------------------|

|                                                                                                                                                                                                                                                                                                                                                             |                                                                                                           |                                                                                                                                                                                                                                                                                                           |                                                                                                                                                       |                                                                    |
|-------------------------------------------------------------------------------------------------------------------------------------------------------------------------------------------------------------------------------------------------------------------------------------------------------------------------------------------------------------|-----------------------------------------------------------------------------------------------------------|-----------------------------------------------------------------------------------------------------------------------------------------------------------------------------------------------------------------------------------------------------------------------------------------------------------|-------------------------------------------------------------------------------------------------------------------------------------------------------|--------------------------------------------------------------------|
| 757, 759-768, 775-780, 783-789, 797-804, 808-813, 842-847, 863-868, 891-896, 899-908, 928-938, 942-950, 965-972, 975-981, 1002-1008, 1025-1031, 1045-1051, 1054-1060, 1062-1075, 1112-1117, 1136-1142, 1147-1155, 1171-1176, 1189-1194, 1206-1212, 1225-1230, 1243-1259, 1284-1289, 1319-1324, 1327-1343, 1346-1351, 1360-1367, 1380-1392, 1395-1400, 1404- | 1547-1551, 1571-1577, 1615-1619, 1644-1648, 1720-1724, 1776-1780, 1813-1817, 1855-1859<br><b>(11.41%)</b> | 1259, 1282-1286, 1298-1315, 1327-1351, 1353-1364, 1383-1398, 1404-1441, 1455-1468, 1470-1479, 1485-1557, 1559-1585, 1604-1608, 1610-1624, 1636-1647, 1671-1678, 1720-1727, 1738-1749, 1751-1758, 1770-1786, 1788-1793, 1795-1799, 1807-1820, 1833-1838, 1856-1861, 1888-1900, 1927-1945<br><b>(42.5%)</b> | 1591-1595, 1614-1619, 1630-1635, 1670-1674, 1683-1688, 1701-1705, 1720-1725, 1741-1756, 1813-1817, 1835-1839, 1854-1859, 1891-1896<br><b>(22.51%)</b> | 1725, 1741-1746, 1777-1783, 1891-1895, 1933-1938<br><b>(14.7%)</b> |
|-------------------------------------------------------------------------------------------------------------------------------------------------------------------------------------------------------------------------------------------------------------------------------------------------------------------------------------------------------------|-----------------------------------------------------------------------------------------------------------|-----------------------------------------------------------------------------------------------------------------------------------------------------------------------------------------------------------------------------------------------------------------------------------------------------------|-------------------------------------------------------------------------------------------------------------------------------------------------------|--------------------------------------------------------------------|



|                                       |                                                                                                                                                                                                                                                                                                                                                                                                 |                                                                                               |                                                                                                                        |                                                                                                                    |                                                                                         |
|---------------------------------------|-------------------------------------------------------------------------------------------------------------------------------------------------------------------------------------------------------------------------------------------------------------------------------------------------------------------------------------------------------------------------------------------------|-----------------------------------------------------------------------------------------------|------------------------------------------------------------------------------------------------------------------------|--------------------------------------------------------------------------------------------------------------------|-----------------------------------------------------------------------------------------|
|                                       | 1437, 1443-<br>1448, 1453-<br>1477, 1486-<br>1499, 1501-<br>1525, 1529-<br>1543, 1549-<br>1556, 1563-<br>1595, 1603-<br>1613, 1615-<br>1623, 1634-<br>1648, 1668-<br>1687, 1699-<br>1706, 1718-<br>1728, 1738-<br>1746, 1758-<br>1773, 1775-<br>1787, 1791-<br>1798, 1810-<br>1819, 1821-<br>1826, 1828-<br>1837, 1846-<br>1852, 1857-<br>1862, 1880-<br>1885, 1928-<br>1941<br><b>(51.61%)</b> |                                                                                               |                                                                                                                        |                                                                                                                    |                                                                                         |
| <b>NSP4 (500)</b><br>(YP_009725300.1) | 9-35, 39-44,<br>48-54, 57-62,<br>90-105, 109-<br>114, 120-<br>137, 147-<br>152, 154-<br>161, 166-                                                                                                                                                                                                                                                                                               | 16-24, 40-44,<br>52-56, 117-<br>121, 128-<br>133, 257-<br>261, 288-<br>293, 297-<br>301, 336- | 1-28, 41-49, 90-<br>103, 114-122,<br>124-135, 137-<br>157, 170-181,<br>193-201, 203-<br>217, 236-240,<br>253-269, 275- | 4-9, 11-29, 72-<br>76, 89-97,<br>100-104, 118-<br>127, 190-194,<br>211-215, 253-<br>257, 262-271,<br>290-306, 312- | 12-31, 90-<br>94, 100-<br>104, 119-<br>124, 128-<br>132, 253-<br>258, 264-<br>271, 286- |

|                                       |                                                                                                                                                              |                                                                    |                                                                                                                                        |                                                                                                              |                                                                             |
|---------------------------------------|--------------------------------------------------------------------------------------------------------------------------------------------------------------|--------------------------------------------------------------------|----------------------------------------------------------------------------------------------------------------------------------------|--------------------------------------------------------------------------------------------------------------|-----------------------------------------------------------------------------|
|                                       | 171, 175-183, 208-218, 231-239, 253-266, 280-299, 311-320, 323-363, 373-389, 393-398, 402-412, 434-439, 444-449, 458-463, 483-488, 491-500<br><b>(57.6%)</b> | 347, 358-362, 403-412, 419-423, 444-448, 484-491<br><b>(18.2%)</b> | 306, 309-332, 334-338, 340-370, 375-409, 411-427, 430-436, 438-453, 494-500<br><b>(65.8%)</b>                                          | 333, 342-354, 358-371, 373-385, 389-396, 398-405, 417-422, 426-430, 434-440, 442-449<br><b>(40%)</b>         | 302, 314-352, 360-385, 387-396, 417-421, 495-500<br><b>(31.6%)</b>          |
| <b>NSP5</b> (306)<br>(YP_009725301.1) | 13-26, 33-47, 65-86, 89-94, 101-118, 123-128, 141-162, 166-176, 196-215, 223-228, 246-251, 254-262, 280-285, 296-306<br><b>(56.2%)</b>                       | 103-107, 139-143, 155-159, 301-306<br><b>(6.86%)</b>               | 15-23, 30-38, 70-78, 80-90, 101-107, 109-121, 135-141, 143-166, 199-218, 221-225, 227-238, 254-269, 281-287, 295-301<br><b>(51.3%)</b> | 29-44, 56-60, 74-78, 84-89, 102-106, 112-117, 154-165, 200-212, 217-222, 231-235, 260-264<br><b>(27.45%)</b> | 16-24, 66-71, 112-117, 157-162, 199-212, 232-236, 302-306<br><b>(16.6%)</b> |
| <b>NSP6</b> (290)<br>(YP_009725302.1) | 15-31, 48-54, 72-82, 103-108, 113-129, 141-155, 165-                                                                                                         | 26-30, 35-39, 41-45, 77-84, 90-94, 120-125, 150-154, 165-          | 10-43, 45-72, 74-86, 88-102, 109-129, 139-156, 161-197,                                                                                | 11-26, 31-45, 47-61, 64-73, 76-86, 88-100, 112-118, 120-127, 138-155,                                        | 12-39, 43-59, 66-72, 78-89, 91-95, 115-125, 141-                            |

|                                        |                                                                   |                                                   |                                                                        |                                                                |                                                                    |
|----------------------------------------|-------------------------------------------------------------------|---------------------------------------------------|------------------------------------------------------------------------|----------------------------------------------------------------|--------------------------------------------------------------------|
|                                        | 226, 241-251, 275-290<br><b>(55.8%)</b>                           | 169, 171-181, 199-203, 211-219<br><b>(23.79%)</b> | 199-250, 269-281, 283-290<br><b>(82.41%)</b>                           | 162-170, 180-203, 208-246, 267-271, 273-277<br><b>(67.24%)</b> | 155, 163-172, 176-185, 187-204, 207-232, 237-245<br><b>(57.5%)</b> |
| <b>NSP7</b> (83)<br>(YP_009725303.1)   | 6-18, 28-33, 51-63<br><b>(38.55%)</b>                             | 14-18<br><b>(6%)</b>                              | 8-19, 29-33, 38-42, 50-63<br><b>(43.37%)</b>                           | 10-16, 27-31, 37-41, 53-61<br><b>(31.32%)</b>                  | 9-17, 30-34, 55-61<br><b>(25.3%)</b>                               |
| <b>NSP8</b> (198)<br>(YP_009725304.1)  | 31-36, 44-49, 81-88, 102-107, 114-172, 182-190<br><b>(42.92%)</b> | 129-133, 182-186<br><b>(5%)</b>                   | 5-9, 11-16, 34-38, 86-96, 122-132, 148-158, 184-191<br><b>(28.78%)</b> | 88-96, 115-122, 127-133, 151-156, 180-188<br><b>(19.69%)</b>   | 58-61, 89-93, 128-132, 147-151, 182-187<br><b>(10.6%)</b>          |
| <b>NSP9</b> (113)<br>(YP_009725305.1)  | 28-33, 61-68, 72-77, 85-90, 101-106<br><b>(28.31%)</b>            | -                                                 | 38-46, 64-68, 85-94, 100-110<br><b>(30.97%)</b>                        | 29-33, 40-44, 51-55, 86-92<br><b>(19.46%)</b>                  | 87-91<br><b>(4.42%)</b>                                            |
| <b>NSP10</b> (139)<br>(YP_009725306.1) | 9-18, 337-47, 50-58, 72-81, 98-103, 107-123<br><b>(45.32%)</b>    | 15-19<br><b>(3.59%)</b>                           | 10-22, 39-48, 54-58, 70-79, 94-99, 109-127<br><b>(45.32%)</b>          | 14-21, 42-47, 73-81, 117-122<br><b>(20.86%)</b>                | 13-20, 71-78, 116-122<br><b>(15.1%)</b>                            |
| <b>NSP11</b> (13)<br>(YP_009725312.1)  | 8-13<br><b>(46.1%)</b>                                            | 6-10<br><b>(38.46%)</b>                           | 6-13<br><b>(61.53%)</b>                                                | -                                                              | 8-13<br><b>(46.1%)</b>                                             |
| <b>NSP12</b> (932)<br>(YP_009725308.1) | 6-16, 25-32, 34-39, 41-47, 65-73, 75-81, 85-90, 111-              | 6-10, 34-38, 77-81, 110-114, 146-150, 203-        | 9-19, 29-37, 39-53, 67-76, 123-132, 142-150, 173-177, 186-             | 6-10, 30-37, 46-50, 67-73, 100-106, 120-133, 144-151,          | 201-205, 239-245, 308-323, 335-345,                                |

|                                                                                                                                                                                                                                                                                                                       |                                                                                                                                                               |                                                                                                                                                                                                                                                                                                      |                                                                                                                                                                                                                                                                                                                                                                |                                                                                                   |
|-----------------------------------------------------------------------------------------------------------------------------------------------------------------------------------------------------------------------------------------------------------------------------------------------------------------------|---------------------------------------------------------------------------------------------------------------------------------------------------------------|------------------------------------------------------------------------------------------------------------------------------------------------------------------------------------------------------------------------------------------------------------------------------------------------------|----------------------------------------------------------------------------------------------------------------------------------------------------------------------------------------------------------------------------------------------------------------------------------------------------------------------------------------------------------------|---------------------------------------------------------------------------------------------------|
| 116, 142-152, 171-176, 185-193, 198-207, 229-239, 243-249, 313-325, 329-347, 352-357, 359-369, 392-401, 404-411, 421-428, 435-440, 467-480, 490-498, 526-531, 535-540, 554-568, 577-592, 601-609, 632-638, 641-650, 659-664, 670-680, 689-710, 715-720, 762-790, 813-821, 826-831, 842-849, 855-865, 880-888, 925-932 | 207, 329-333, 337-341, 352-356, 371-375, 491-495, 559-563, 569-573, 585-590, 671-675, 692-697, 775-779, 784-788, 828-832, 843-847, 884-888<br><b>(11.48%)</b> | 192, 199-207, 218-222, 233-242, 244-250, 265-271, 283-287, 310-321, 329-338, 340-351, 366-377, 396-406, 422-430, 436-440, 464-480, 530-535, 538-547, 557-566, 582-594, 596-606, 628-643, 647-652, 662-676, 689-705, 742-792, 838-847, 855-867, 879-888, 899-905, 919-926, 928-932<br><b>(44.52%)</b> | 172-176, 184-188, 190-194, 202-206, 214-218, 238-247, 266-275, 281-292, 306-319, 331-336, 346-350, 370-375, 394-400, 405-409, 438-443, 454-460, 467-474, 492-496, 504-508, 513-517, 526-530, 544-548, 628-639, 650-655, 664-668, 725-733, 743-751, 753-758, 763-768, 784-789, 791-795, 826-830, 842-846, 854-862, 879-890, 900-907, 921-926<br><b>(33.15%)</b> | 395-399, 438-443, 469-474, 559-565, 691-701, 763-768, 784-791, 880-886, 902-906<br><b>(10.4%)</b> |
|-----------------------------------------------------------------------------------------------------------------------------------------------------------------------------------------------------------------------------------------------------------------------------------------------------------------------|---------------------------------------------------------------------------------------------------------------------------------------------------------------|------------------------------------------------------------------------------------------------------------------------------------------------------------------------------------------------------------------------------------------------------------------------------------------------------|----------------------------------------------------------------------------------------------------------------------------------------------------------------------------------------------------------------------------------------------------------------------------------------------------------------------------------------------------------------|---------------------------------------------------------------------------------------------------|

|                                        |                                                                                                                                                                                                                                                                                                                                                                                                                    |                                                                                                                                          |                                                                                                                                                                                                                                                                                                                                            |                                                                                                                                                                                                                                                             |                                                                                                                              |
|----------------------------------------|--------------------------------------------------------------------------------------------------------------------------------------------------------------------------------------------------------------------------------------------------------------------------------------------------------------------------------------------------------------------------------------------------------------------|------------------------------------------------------------------------------------------------------------------------------------------|--------------------------------------------------------------------------------------------------------------------------------------------------------------------------------------------------------------------------------------------------------------------------------------------------------------------------------------------|-------------------------------------------------------------------------------------------------------------------------------------------------------------------------------------------------------------------------------------------------------------|------------------------------------------------------------------------------------------------------------------------------|
|                                        | <b>(44.2%)</b>                                                                                                                                                                                                                                                                                                                                                                                                     |                                                                                                                                          |                                                                                                                                                                                                                                                                                                                                            |                                                                                                                                                                                                                                                             |                                                                                                                              |
| <b>NSP13 (601)</b><br>(YP_009725308.1) | 1-11, 24-50,<br>55-65, 67-74,<br>79-101, 106-<br>111, 120-<br>126, 144-<br>159, 179-<br>185, 187-<br>199, 205-<br>214, 216-<br>233, 235-<br>240, 245-<br>252, 262-<br>267, 289-<br>294, 300-<br>310, 330-<br>362, 366-<br>376, 382-<br>387, 394-<br>401, 421-<br>429, 447-<br>457, 474-<br>486, 491-<br>501, 508-<br>515, 520-<br>526, 528-<br>538, 541-<br>551, 560-<br>578, 587-<br>592, 596-601<br><b>(59%)</b> | 41-45, 191-<br>195, 255-<br>259, 266-<br>270, 295-<br>299, 395-<br>399, 421-<br>425, 478-<br>482, 494-<br>498, 542-546<br><b>(8.31%)</b> | 1-11, 24-34, 36-<br>46, 59-70, 83-<br>95, 107-111,<br>133-137, 146-<br>156, 177-186,<br>212-216, 219-<br>233, 243-253,<br>290-299, 301-<br>313, 319-323,<br>327-332, 351-<br>363, 367-377,<br>380-384, 394-<br>401, 420-<br>433,448-454,<br>471-484, 495-<br>501, 507-513,<br>522-525, 540-<br>549, 565-578,<br>585-590<br><b>(46.08%)</b> | 4-8, 18-33, 62-<br>66, 69-73,<br>120-124, 163-<br>167, 178-187,<br>223-228, 245-<br>251, 291-300,<br>303-308, 353-<br>359, 370-374,<br>395-399, 426-<br>430, 453-457,<br>470-478, 497-<br>501, 508-513,<br>542-547, 559-<br>565, 571-577<br><b>(24.45%)</b> | 2-9, 44-<br>48, 65-69,<br>222-230,<br>252-256,<br>292-299,<br>305-309,<br>355-361,<br>543-547,<br>571-575<br><b>(10.48%)</b> |

|                                                                            |                                                                                                                                                                                                                                                                                                                                                               |                                                                                                                                           |                                                                                                                                                                                                                                                                                   |                                                                                                                                                                                                                                                                                                                              |                                                                                                                     |
|----------------------------------------------------------------------------|---------------------------------------------------------------------------------------------------------------------------------------------------------------------------------------------------------------------------------------------------------------------------------------------------------------------------------------------------------------|-------------------------------------------------------------------------------------------------------------------------------------------|-----------------------------------------------------------------------------------------------------------------------------------------------------------------------------------------------------------------------------------------------------------------------------------|------------------------------------------------------------------------------------------------------------------------------------------------------------------------------------------------------------------------------------------------------------------------------------------------------------------------------|---------------------------------------------------------------------------------------------------------------------|
| <p style="text-align: center;"><b>NSP14 (527)</b><br/>(YP_009725309.1)</p> | <p>3-19, 24-33,<br/>35-43, 100-<br/>105, 108-<br/>127, 159-<br/>171, 179-<br/>187, 194-<br/>202, 205-<br/>211, 214-<br/>223, 229-<br/>236, 240-<br/>245, 259-<br/>265, 275-<br/>280, 285-<br/>290, 311-<br/>321, 325-<br/>333, 346-<br/>351, 377-<br/>386, 394-<br/>402, 416-<br/>421, 432-<br/>441, 443-<br/>448, 455-<br/>479, 502-514<br/><b>(47%)</b></p> | <p>38-42, 114-<br/>118, 160-<br/>164, 194-<br/>201, 232-<br/>236, 380-<br/>384, 417-<br/>421, 459-<br/>463, 491-495<br/><b>(9.1%)</b></p> | <p>9-13, 15-19, 52-<br/>65, 82-92, 107-<br/>120, 152-157,<br/>159-172, 178-<br/>202, 228-238,<br/>240-246, 271-<br/>296, 298-303,<br/>312-326, 363-<br/>372, 379-389,<br/>400-404, 431-<br/>436, 438-442,<br/>444-449, 461-<br/>466, 468-479,<br/>495-515<br/><b>(45.73%)</b></p> | <p>50-60, 71-75,<br/>81-89, 147-<br/>155, 159-169,<br/>181-188, 196-<br/>200, 207-211,<br/>225-229, 233-<br/>243, 245-249,<br/>258-262, 274-<br/>282, 284-288,<br/>290-294, 313-<br/>317, 348-352,<br/>365-370, 381-<br/>387, 397-401,<br/>403-407, 443-<br/>447, 491-497,<br/>506-513, 515-<br/>522<br/><b>(33.20%)</b></p> | <p>114-122,<br/>181-187,<br/>224-230,<br/>233-239,<br/>381-387,<br/>442-447,<br/>503-512<br/><b>(10.24%)</b></p>    |
| <p style="text-align: center;"><b>NSP15 (346)</b><br/>(YP_09725310.1)</p>  | <p>7-14, 22-43,<br/>51-56, 79-88,<br/>94-106, 114-<br/>123, 129-<br/>134, 139-<br/>156, 162-<br/>197, 231-<br/>240, 273-<br/>280, 285-</p>                                                                                                                                                                                                                    | <p>23-28, 76-80,<br/>82-86, 100-<br/>104, 119-<br/>123, 139-<br/>144, 164-<br/>169, 175-<br/>179, 184-<br/>188, 275-<br/>279, 301-307</p> | <p>1-7, 24-32, 35-<br/>39, 51-56, 68-<br/>77, 79-85, 96-<br/>106, 119-124,<br/>143-147, 163-<br/>174, 180-184,<br/>230-241, 245-<br/>256, 273-280,</p>                                                                                                                            | <p>55-59, 83-88,<br/>120-124, 132-<br/>136, 211-216,<br/>222- 226, 230-<br/>238, 249-253,<br/>277-281, 292-<br/>301, 326-333,<br/>339-343<br/><b>(21.38%)</b></p>                                                                                                                                                            | <p>82-86, 98-<br/>104, 117-<br/>122, 248-<br/>252, 292-<br/>296, 319-<br/>323, 327-<br/>332<br/><b>(10.98%)</b></p> |

|                                        |                                                                                                                                                           |                                                                           |                                                                                                                               |                                                                                                     |                                                             |
|----------------------------------------|-----------------------------------------------------------------------------------------------------------------------------------------------------------|---------------------------------------------------------------------------|-------------------------------------------------------------------------------------------------------------------------------|-----------------------------------------------------------------------------------------------------|-------------------------------------------------------------|
|                                        | 298, 301-306, 309-331, 336-342<br><b>(56.93%)</b>                                                                                                         | <b>(17.34%)</b>                                                           | 289-304, 306-334<br><b>(46.24%)</b>                                                                                           |                                                                                                     |                                                             |
| <b>NSP16</b> (298)<br>(YP_009725311.1) | 43-49, 53-58, 66-72, 78-84, 115-122, 124-131, 135-142, 148-158, 162-172, 190-198, 202-210, 225-230, 237-242, 258-263, 270-276, 286-295<br><b>(42.28%)</b> | 27-31, 48-52, 109-113, 124-129, 204-208, 225-229, 278-282<br><b>(12%)</b> | 38-61, 63-71, 84-89, 124-131, 149-161, 163-172, 179-197, 203-211, 222-233, 238-250, 252-261, 269-279, 290-294<br><b>(50%)</b> | 15-23, 48-59, 63-70, 84-90, 124-130, 149-159, 185-195, 204-211, 221-232, 269-274<br><b>(30.53%)</b> | 66-70, 150-156, 186-196, 206-210, 225-231<br><b>(16.1%)</b> |

**Supplementary table 4:** Predicted APRs in structural proteins of SARS-CoV.

| <b>SARS-CoV Protein (length in amino acids) (UniProt ID)</b> | <b>MetAmyl (% of APRs)</b>                                                                             | <b>FISH Amyloid (% of APRs)</b>                                                                           | <b>AGGRESCAN (% of APRs)</b>                                                                                                                        | <b>FoldAmyloid (% of APRs)</b>                                                                                 | <b>CamSol (Degree of hydrophobicity)</b>                                                                                                            |
|--------------------------------------------------------------|--------------------------------------------------------------------------------------------------------|-----------------------------------------------------------------------------------------------------------|-----------------------------------------------------------------------------------------------------------------------------------------------------|----------------------------------------------------------------------------------------------------------------|-----------------------------------------------------------------------------------------------------------------------------------------------------|
| <b>Spike Glycoprotein</b> (1255) (P59594)                    | 61-76, 87-92, 97-107, 111-130, 146-153, 159-173, 191-207, 211-216, 224-229, 231-239, 249-259, 271-276, | 3-10, 39-43, 58-62, 112-118, 160-164, 192-201, 252-256, 292-296, 352-357, 393-397, 403-407, 433-437, 500- | 1-12, 54-60, 62-68, 83-88, 97-106, 111-129, 137-142, 152-169, 189-201, 224-239, 247-258, 287-291, 310-316, 318-323, 325-334, 336-341, 349-370, 377- | 1-10, 52-64, 99-103, 123-128, 150-155, 183-187, 193-198, 232-237, 251-256, 261-265, 314-318, 353-363, 376-381, | 1-10, 59-66, 114-118, 158-162, 194-198, 250-256, 355-364, 418-422, 483-488, 494-501, 525-530, 578-584, 595-599, 657-663, 675-680, 697-706, 734-743, |

|                                       |                                                                                                                                                                                                                                                                                                                                                                                                                                                                                                                                                                                                            |                                                                                                                                                                                                                                                                                |                                                                                                                                                                                                                                                                                                                                                                                                                                                             |                                                                                                                                                                                                                                                                                                                |                                                                                                                      |
|---------------------------------------|------------------------------------------------------------------------------------------------------------------------------------------------------------------------------------------------------------------------------------------------------------------------------------------------------------------------------------------------------------------------------------------------------------------------------------------------------------------------------------------------------------------------------------------------------------------------------------------------------------|--------------------------------------------------------------------------------------------------------------------------------------------------------------------------------------------------------------------------------------------------------------------------------|-------------------------------------------------------------------------------------------------------------------------------------------------------------------------------------------------------------------------------------------------------------------------------------------------------------------------------------------------------------------------------------------------------------------------------------------------------------|----------------------------------------------------------------------------------------------------------------------------------------------------------------------------------------------------------------------------------------------------------------------------------------------------------------|----------------------------------------------------------------------------------------------------------------------|
|                                       | 287-295,<br>298-311,<br>313-323,<br>328-339,<br>344-374,<br>377-394,<br>399-408,<br>419-424,<br>428-433,<br>456-461,<br>482-503,<br>509-514,<br>523-530,<br>532-540,<br>573-586,<br>594-612,<br>624-633,<br>637-646,<br>659-667,<br>672-679,<br>685-690,<br>700-706,<br>708-725,<br>738-745,<br>763-768,<br>783-788,<br>804-812,<br>837-843,<br>851-865,<br>888-900,<br>912-927,<br>929-934,<br>940-945,<br>951-963,<br>973-980,<br>985-995,<br>7011-1019,<br>1038-1053,<br>1057-1063,<br>1074-1087,<br>1101-1119,<br>1141-1146,<br>1153-1163,<br>1197-1227,<br>1230-1237,<br>1245-1255<br><b>(52.19%)</b> | 504, 516-<br>520, 523-<br>530, 536-<br>540, 545-<br>549, 577-<br>585, 595-<br>599, 765-<br>769, 804-<br>808, 896-<br>900, 935-<br>939, 983-<br>987, 1041-<br>1050, 1075-<br>1079, 1093-<br>1097, 1109-<br>1115, 1157-<br>1162, 1188-<br>1192, 1210-<br>1214<br><b>(14.42%)</b> | 387, 415-425,<br>471-476, 478-<br>492, 494-506,<br>508-512, 532-<br>537, 576-585,<br>592-601, 637-<br>641, 652-665,<br>669-685, 690-<br>696, 698-709,<br>711-716, 718-<br>723, 733-741,<br>743-747, 775-<br>788, 799-815,<br>835-843, 846-<br>852, 854-878,<br>880-896, 943-<br>964, 982-995,<br>1026-1034,<br>1040-1050,<br>1073-1084,<br>1086-1093,<br>1095-1101,<br>1106-1119,<br>1153-1161,<br>1189-1194,<br>1196-1231,<br>1248-1255<br><b>(53.46%)</b> | 417-424,<br>438-444,<br>473-478,<br>493-503,<br>525-529,<br>595-599,<br>661-667,<br>675-679,<br>700-704,<br>720-725,<br>733-737,<br>762-766,<br>780-786,<br>801-807,<br>876-889,<br>975-981,<br>987-996,<br>1029-1033,<br>1042-1049,<br>1083-1087,<br>1090-1094,<br>1109-1114,<br>1192-1221<br><b>(21.44%)</b> | 854-858, 866-<br>871, 877-881,<br>986-992, 1041-<br>1050, 1076-<br>1086, 1109-<br>1114, 1193-1224<br><b>(16.09%)</b> |
| <b>Envelope<br/>(76)<br/>(P59637)</b> | 1-6, 9-63<br><b>(80.26%)</b>                                                                                                                                                                                                                                                                                                                                                                                                                                                                                                                                                                               | 10-14, 16-<br>23, 25-29<br><b>(23.68%)</b>                                                                                                                                                                                                                                     | 1-5, 11-53, 55-<br>62<br><b>(73.6%)</b>                                                                                                                                                                                                                                                                                                                                                                                                                     | 11-51, 56-60<br><b>(60.53%)</b>                                                                                                                                                                                                                                                                                | 12-37, 39-50,<br>54-59<br><b>(57.89%)</b>                                                                            |



|                                          |                                                                                                                                                                      |                                                                                               |                                                                                                    |                                                                                                                            |                                                           |
|------------------------------------------|----------------------------------------------------------------------------------------------------------------------------------------------------------------------|-----------------------------------------------------------------------------------------------|----------------------------------------------------------------------------------------------------|----------------------------------------------------------------------------------------------------------------------------|-----------------------------------------------------------|
| <b>Membrane</b><br>(221)<br>(P59596)     | 4-9, 20-27,<br>34-39, 42-<br>53, 59-72,<br>74-81, 83-<br>101, 117-<br>132, 135-<br>147, 166-<br>172, 191-<br>196, 215-<br>221<br><b>(55.2%)</b>                      | 24-28, 43-<br>48, 68-72,<br>98-102, 107-<br>111, 140-<br>144, 200-<br>204,<br><b>(16.28%)</b> | 18-37, 42-57,<br>59-107, 117-<br>121, 123-130,<br>134-147, 170-<br>180, 216-221<br><b>(58.37%)</b> | 17-38, 43-59,<br>61-75, 80-<br>104, 107-111,<br>117-121,<br>137-146,<br>175-179,<br>196-201,<br>217-221<br><b>(52.04%)</b> | 20-37, 45-78,<br>80-99<br><b>(32.57%)</b>                 |
| <b>Nucleocapsid</b><br>(422)<br>(P59595) | 13-18, 50-<br>59, 109-<br>114, 129-<br>136, 156-<br>162, 233-<br>240, 242-<br>252, 266-<br>276, 333-<br>338, 347-<br>338, 347-<br>356, 389-<br>397<br><b>(21.8%)</b> | 71-76, 160-<br>164, 239-<br>245, 349-<br>353, 386-390<br><b>(6.63%)</b>                       | 50-57, 108-<br>117, 127-138,<br>218-227, 311-<br>323, 328-336,<br>349-353<br><b>(15.87%)</b>       | 52-56, 86-90,<br>107-114,<br>131-135,<br>220-227,<br>314-318,<br>330-334,<br>351-356<br><b>(11.14%)</b>                    | 52-57, 108-114,<br>131-135, 331-<br>335<br><b>(5.45%)</b> |

**Supplementary table 5:** Predicted APRs in accessory proteins of SARS-CoV.

| <b>SARS-CoV</b><br><b>Proteins (length in</b><br><b>amino acids)</b><br><b>(UniProt ID)</b> | <b>MetAmyl</b><br><b>(% of APRs)</b>                                                                                                                                    | <b>FISH</b><br><b>Amyloid</b><br><b>(% of</b><br><b>APRs)</b>                              | <b>AGGRESCAN</b><br><b>(% of APRs)</b>                                                                    | <b>FoldAmyloid</b><br><b>(% of APRs)</b>                                                                                        | <b>CamSol</b><br><b>(% of APRs)</b>                                                                  |
|---------------------------------------------------------------------------------------------|-------------------------------------------------------------------------------------------------------------------------------------------------------------------------|--------------------------------------------------------------------------------------------|-----------------------------------------------------------------------------------------------------------|---------------------------------------------------------------------------------------------------------------------------------|------------------------------------------------------------------------------------------------------|
| <b>ORF3a</b><br>(274)<br>(P59632)                                                           | 7-16, 27-36,<br>45-67, 76-97,<br>103-119,<br>143-152,<br>161-174,<br>185-190,<br>196-213,<br>216-221,<br>229-237,<br>242-248,<br>250-255,<br>267-274<br><b>(60.58%)</b> | 49-55, 77-<br>81, 86-91,<br>104-114,<br>142-146,<br>214-220,<br>228-233<br><b>(17.15%)</b> | 1-16, 31-35,<br>37-41, 43-67,<br>69-132, 141-<br>150, 160-168,<br>198-216, 227-<br>236<br><b>(59.48%)</b> | 1-10, 43-57,<br>61-65, 69-73,<br>75-97, 103-<br>117, 119-132,<br>139-152,<br>154-159,<br>199-213,<br>229-235<br><b>(47.08%)</b> | 4-8, 42-57,<br>76-98, 104-<br>118, 126-<br>131, 143-<br>151, 199-<br>211, 228-234<br><b>(34.30%)</b> |
| <b>ORF3b</b><br>(154)<br>(P59633)                                                           | 3-37, 43-61,<br>67-76, 79-87,<br>116-121,<br>137-148                                                                                                                    | 16-25, 46-<br>50, 116-121<br><b>(13.63%)</b>                                               | 4-34, 44-67,<br>71-88, 93-97,<br>116-123<br><b>(55.84%)</b>                                               | 4-8, 12-21,<br>25-31, 46-52,<br>61-65, 75-89,                                                                                   | 7-30, 46-51,<br>81-86, 116-<br>122<br><b>(27.92%)</b>                                                |

|                                   |                                                  |                                                 |                                                            |                                                     |                                     |
|-----------------------------------|--------------------------------------------------|-------------------------------------------------|------------------------------------------------------------|-----------------------------------------------------|-------------------------------------|
|                                   | (59.09%)                                         |                                                 |                                                            | 112-125,<br>128-134<br>(45.45%)                     |                                     |
| <b>ORF6</b><br>(63)<br>(P59634)   | 4-26, 28-41<br>(58.73%)                          | 7-11, 14-18,<br>29-34<br>(25.39%)               | 1-39<br>(61.90%)                                           | 1-10, 12-40<br>(61.90%)                             | 1-19, 24-35<br>(49.20%)             |
| <b>ORF7a</b><br>(122)<br>(P59635) | 3-17, 23-32,<br>56-64, 100-<br>118<br>(43.44%)   | 5-11, 17-21,<br>101-105,<br>108-113<br>(18.85%) | 1-18, 26-33,<br>55-67, 101-118<br>(65.9%)                  | 1-13, 16-22,<br>63-67, 73-77,<br>99-117<br>(40.16%) | 1-15, 56-66,<br>100-115<br>(34.42%) |
| <b>ORF7b</b><br>(44)<br>(Q7TFA1)  | 5-12, 18-35<br>(59%)                             | 12-28<br>(38.63%)                               | 5-33<br>(65.9%)                                            | 5-32<br>(63.64%)                                    | 7-32<br>(59.09%)                    |
| <b>ORF8a</b><br>(39)<br>(Q7TFA0)  | 1-25<br>(61.53%)                                 | 2-6<br>(12.8%)                                  | 1-21<br>(53.8%)                                            | 1-22<br>(54.41%)                                    | 2-21<br>(51.28%)                    |
| <b>ORF8b</b><br>(84)<br>(Q80H93)  | 2-10, 26-32,<br>34-49, 73-81<br>(48.8%)          | 6-10<br>(5.95%)                                 | 1-9, 17-28, 33-<br>39, 54-63, 72-<br>80<br>(55.95%)        | 1-9, 18-23,<br>28-38, 56-64,<br>73-79<br>(50%)      | 17-25, 74-78<br>(16.66%)            |
| <b>ORF9b</b><br>(98)<br>(P59636)  | 4-9, 19-27,<br>41-48, 72-81,<br>90-98<br>(42.8%) | 41-46<br>(6.12%)                                | 12-17, 21-25,<br>45-50, 52-56,<br>75-80, 91-98<br>(36.73%) | 21-26, 43-49<br>(13.27%)                            | 73-79, 93-97<br>(12.24%)            |
| <b>ORF14</b><br>(70)<br>(Q7TLC7)  | 35-44, 49-54,<br>58-66<br>(35.71%)               | 36-44, 48-<br>52<br>(20%)                       | 35-41, 44-48,<br>50-57, 59-64<br>(37.14%)                  | 35-39, 51-60<br>(21.43%)                            | 33-40<br>(11.42%)                   |

**Supplementary table 6:** Predicted APRs in non-structural proteins of SARS-CoV.

| <b>SARS-CoV<br/>(UniProt ID:<br/>P0C6X7) Proteins<br/>(length in amino<br/>acids)</b> | <b>MetAmyl<br/>(% of APRs)</b>                                                                                               | <b>FISH<br/>Amyloid<br/>(% of<br/>APRs)</b>                                                                        | <b>AGGRESCAN<br/>(% of APRs)</b>                                                                                                                     | <b>FoldAmyloid<br/>(% of APRs)</b>                                                                                                                    | <b>CamSol<br/>(% of APRs)</b>                                                  |
|---------------------------------------------------------------------------------------|------------------------------------------------------------------------------------------------------------------------------|--------------------------------------------------------------------------------------------------------------------|------------------------------------------------------------------------------------------------------------------------------------------------------|-------------------------------------------------------------------------------------------------------------------------------------------------------|--------------------------------------------------------------------------------|
| <b>Nsp1</b><br>(180)                                                                  | 2-31, 50-55,<br>66-74, 82-90,<br>100-115<br>(38.88%)                                                                         | 4-11, 59-66,<br>105-109<br>(11.66%)                                                                                | 1-8, 20-31, 52-<br>58, 68-74, 85-<br>93, 98-108,<br>117-121<br>(32.77%)                                                                              | 2-7, 18-22,<br>25-29, 68-72,<br>104-109, 116-<br>124<br>(20%)                                                                                         | 15-20, 103-<br>109<br>(7.22%)                                                  |
| <b>Nsp2</b><br>(638)                                                                  | 1-6, 29-36,<br>46-53, 92-<br>108, 118-123,<br>149-154,<br>166-173, 182-<br>190, 225-239,<br>279-288,<br>291-312,<br>318-332, | 38-42, 100-<br>104, 168-<br>172, 292-<br>297, 318-<br>322, 326-<br>330, 362-<br>366, 413-<br>418, 447-<br>52, 458- | 97-104, 118-<br>124, 137-141,<br>182-188, 226-<br>242, 282-286,<br>291-324, 358-<br>371, 384-393,<br>400-425, 433-<br>445, 447-461,<br>464-484, 494- | 22-26, 48-52,<br>58-62, 92-96,<br>134-139, 150-<br>158, 227-236,<br>241-245, 271-<br>275, 285-289,<br>294-299, 365-<br>370, 398-406,<br>415-420, 431- | 227-236,<br>295-299,<br>413-424,<br>468-479,<br>496-501,<br>600-608<br>(8.46%) |

|                       |                                                                                                                                                                                                                                                                                                                                                                                                                |                                                                                                                                                                                                                                                                                                                                                                                                                   |                                                                                                                                                                                                                                                                                                                                                                                                                                                                                                                                       |                                                                                                                                                                                                                                                                                                                                                                                                                                                                                                                                       |                                                                                                                                                                                                                                                                                                                                                                                                   |
|-----------------------|----------------------------------------------------------------------------------------------------------------------------------------------------------------------------------------------------------------------------------------------------------------------------------------------------------------------------------------------------------------------------------------------------------------|-------------------------------------------------------------------------------------------------------------------------------------------------------------------------------------------------------------------------------------------------------------------------------------------------------------------------------------------------------------------------------------------------------------------|---------------------------------------------------------------------------------------------------------------------------------------------------------------------------------------------------------------------------------------------------------------------------------------------------------------------------------------------------------------------------------------------------------------------------------------------------------------------------------------------------------------------------------------|---------------------------------------------------------------------------------------------------------------------------------------------------------------------------------------------------------------------------------------------------------------------------------------------------------------------------------------------------------------------------------------------------------------------------------------------------------------------------------------------------------------------------------------|---------------------------------------------------------------------------------------------------------------------------------------------------------------------------------------------------------------------------------------------------------------------------------------------------------------------------------------------------------------------------------------------------|
|                       | 339-344,<br>348-354,<br>358-372,<br>384-394,<br>404-431,<br>437-442,<br>447-452,<br>454-462,<br>471-488,<br>494-506,<br>509-518,<br>525-533,<br>536-541,<br>557-564,<br>568-574,<br>576-581,<br>593-608<br><b>(48.74%)</b>                                                                                                                                                                                     | 462, 470-<br>480, 511-<br>515, 560-<br>564,<br><b>(11.59%)</b>                                                                                                                                                                                                                                                                                                                                                    | 506, 509-515,<br>523-534, 572-<br>576, 593-601,<br>603-612, 625-<br>632<br><b>(38.7%)</b>                                                                                                                                                                                                                                                                                                                                                                                                                                             | 435, 445-452,<br>466-475, 496-<br>501, 507-511,<br>527-531, 536-<br>540, 548-552,<br>606-612, 631-<br>635<br><b>(23.2%)</b>                                                                                                                                                                                                                                                                                                                                                                                                           |                                                                                                                                                                                                                                                                                                                                                                                                   |
| <b>Nsp3</b><br>(1922) | 1-10, 12-18,<br>21-28, 39-67,<br>,83-90, 103-<br>109, 151-157,<br>185-191,<br>197-207,<br>213-219,<br>257-263,<br>273-279,<br>309-314,<br>320-337,<br>342-350,<br>372-384,<br>393-405,<br>444-450,<br>452-462,<br>482-488,<br>508-516,<br>525-530,<br>549-561,<br>569-584,<br>588-597,<br>603-616,<br>628-646,<br>628-646,<br>662-667,<br>681-686,<br>691-697,<br>707-712,<br>724-736,<br>738-743,<br>752-757, | 5-9, 11-15,<br>196-205,<br>319-323,<br>331-335,<br>435-439,<br>455-459,<br>552-556,<br>577-581,<br>588-593,<br>682-686,<br>723-727,<br>762-766,<br>800-804,<br>932-927,<br>941-945,<br>987-991,<br>1045-1046,<br>1083-1087,<br>1115-1119,<br>1125-1130,<br>1149-1153,<br>1323-1327,<br>1373-1377,<br>1410-1414,<br>1548-1552,<br>1555-1559,<br>1592-1596,<br>1621-1625,<br>1697-1701,<br>1787-1791,<br>1799-1803, | 43-47, 52-67,<br>83-91, 102-<br>108, 144-148,<br>193-205, 215-<br>222, 258-267,<br>273-279, 302-<br>306, 308-317,<br>319-334, 345-<br>351, 393-397,<br>408-418, 444-<br>459, 480-485,<br>507-514, 526-<br>534, 549-562,<br>571-587, 589-<br>601, 608-613,<br>631-637, 643-<br>647, 660-665,<br>695-699, 713-<br>717, 719-734,<br>742-748, 774-<br>780, 819-825,<br>833-846, 868-<br>879, 905-912,<br>922-934, 937-<br>944, 958-968,<br>1022-1032,<br>1039-1046,<br>1113-1119,<br>1129-1134,<br>1149-1154,<br>1165-1174,<br>1229-1235, | 23-27, 53-58,<br>84-92, 101-<br>107, 200-205,<br>215-219, 289-<br>293, 303-307,<br>323-328, 331-<br>336, 343-350,<br>411-416, 443-<br>447, 455-459,<br>510-514, 529-<br>538, 547-559,<br>578-584, 591-<br>595, 608-613,<br>622-626, 670-<br>674, 683-687,<br>692-696, 728-<br>732, 776-780,<br>791-796, 802-<br>807, 833-843,<br>856-861, 868-<br>876, 892-896,<br>907-912, 926-<br>931, 1024-<br>1028, 1116-<br>1120, 1127-<br>1133, 1149-<br>1153, 1166-<br>1174, 1232-<br>1236, 1321-<br>1326, 1328-<br>1341, 1384-<br>1407, 1409- | 54-60, 85-89,<br>215-221,<br>322-328,<br>331-336,<br>510-514,<br>527-531,<br>577-583,<br>605-614,<br>744-748,<br>835-842,<br>869-875,<br>908-912,<br>943-947,<br>1150-1154,<br>1168-1172,<br>1326-1341,<br>1387-1414,<br>1447-1451,<br>1465-1472,<br>1476-1481,<br>1485-1503,<br>1505-1516,<br>1519-1531,<br>1541-1560,<br>1566-1570,<br>1697-1702,<br>1718-1723,<br>1831-1835<br><b>(12.90%)</b> |

|  |                                                                                                                                                                                                                                                                                                                                                                                                                                                                                                                                                                                                                                                                                                                    |                                            |                                                                                                                                                                                                                                                                                                                                                                                           |                                                                                                                                                                                                                                                                                                       |  |
|--|--------------------------------------------------------------------------------------------------------------------------------------------------------------------------------------------------------------------------------------------------------------------------------------------------------------------------------------------------------------------------------------------------------------------------------------------------------------------------------------------------------------------------------------------------------------------------------------------------------------------------------------------------------------------------------------------------------------------|--------------------------------------------|-------------------------------------------------------------------------------------------------------------------------------------------------------------------------------------------------------------------------------------------------------------------------------------------------------------------------------------------------------------------------------------------|-------------------------------------------------------------------------------------------------------------------------------------------------------------------------------------------------------------------------------------------------------------------------------------------------------|--|
|  | 760-766,<br>775-782,<br>8181-826,<br>833-840,<br>844-850,<br>868-885,<br>905-914,<br>918-927,<br>938-949,<br>952-967,<br>994-1001,<br>1018-1037,<br>1044-1051,<br>1102-1109,<br>1113-1119,<br>1124-1131,<br>1148-1162,<br>1182-1194,<br>1220-1237,<br>1240-1247,<br>1261-1266,<br>1279-1291,<br>1296-1302,<br>1306-1315,<br>1319-1345,<br>1359-1367,<br>1372-1378,<br>1383-1389,<br>1396-1416,<br>1420-1425,<br>1432-1438,<br>1444-1453,<br>1463-1473,<br>1475-1482,<br>1487-1492,<br>1501-1512,<br>1514-1519,<br>1525-1533,<br>1540-1560,<br>1562-1572,<br>1580-1590,<br>1592-1600,<br>1614-1625,<br>1645-1658,<br>1676-1683,<br>1695-1705,<br>1705-1723,<br>1735-1750,<br>1752-1765,<br>1769-1775,<br>1787-1814, | 1897-1871,<br>1909-1914,<br><b>(9.26%)</b> | 1258-1263,<br>1273-1292,<br>1294-1302,<br>1304-1310,<br>1323-1328,<br>1330-1341,<br>1360-1375,<br>1381-1418,<br>1440-1445,<br>1447-1456,<br>1462-1534,<br>1536-1562,<br>1564-1570,<br>1581-1585,<br>1587-1600,<br>1616-1624,<br>1648-1655,<br>1697-1704,<br>1715-1726,<br>1728-1735,<br>1747-1763,<br>1765-1776,<br>1783-1797,<br>1833-1838,<br>1866-1877,<br>1904-1922<br><b>(41.4%)</b> | 1414, 1447-<br>1452, 1477-<br>1482, 1484-<br>1501, 1504-<br>1532, 1538-<br>1559, 1568-<br>1572, 1591-<br>1596, 1609-<br>1613, 1647-<br>1651, 1660-<br>1665, 1678-<br>1682, 1697-<br>1702, 1718-<br>1733, 1790-<br>1794, 1811-<br>1816, 1831-<br>1836, 1868-<br>1873, 1897-<br>1903<br><b>(23.99%)</b> |  |
|--|--------------------------------------------------------------------------------------------------------------------------------------------------------------------------------------------------------------------------------------------------------------------------------------------------------------------------------------------------------------------------------------------------------------------------------------------------------------------------------------------------------------------------------------------------------------------------------------------------------------------------------------------------------------------------------------------------------------------|--------------------------------------------|-------------------------------------------------------------------------------------------------------------------------------------------------------------------------------------------------------------------------------------------------------------------------------------------------------------------------------------------------------------------------------------------|-------------------------------------------------------------------------------------------------------------------------------------------------------------------------------------------------------------------------------------------------------------------------------------------------------|--|

|                      |                                                                                                                                                                                                                                                             |                                                                                                                                                                                                                   |                                                                                                                                                                                                                                                      |                                                                                                                                                                                                                               |                                                                                                                                                                                   |
|----------------------|-------------------------------------------------------------------------------------------------------------------------------------------------------------------------------------------------------------------------------------------------------------|-------------------------------------------------------------------------------------------------------------------------------------------------------------------------------------------------------------------|------------------------------------------------------------------------------------------------------------------------------------------------------------------------------------------------------------------------------------------------------|-------------------------------------------------------------------------------------------------------------------------------------------------------------------------------------------------------------------------------|-----------------------------------------------------------------------------------------------------------------------------------------------------------------------------------|
|                      | 1823-1829,<br>1834-1839,<br>1857-1862,<br>1865-1871,<br>1897-1902,<br>1905-1917<br><b>(49.58%)</b>                                                                                                                                                          |                                                                                                                                                                                                                   |                                                                                                                                                                                                                                                      |                                                                                                                                                                                                                               |                                                                                                                                                                                   |
| <b>Nsp4</b><br>(500) | 1-8, 13-36,<br>53-58, 86-<br>104, 109-114,<br>120-137,<br>147-152,<br>154-161,<br>166-171,<br>208-218,<br>229-239,<br>250-278,<br>280-302,<br>307-312,<br>323-367,<br>372-387,<br>393-398,<br>402-412,<br>444-449,<br>483-488,<br>491-500<br><b>(56.2%)</b> | 22-26, 52-<br>56, 90-95,<br>117-121,<br>128-133,<br>229-233,<br>257-261,<br>264-268,<br>325-329,<br>336-347,<br>349-353,<br>358-362,<br>377-385,<br>406-410,<br>419-423,<br>444-448,<br>484-491<br><b>(20.2%)</b> | 1-28, 30-35,<br>90-103, 113-<br>122, 124-135,<br>137-159, 170-<br>181, 193-201,<br>203-217, 230-<br>240, 250-269,<br>275-307, 309-<br>313, 315-332,<br>334-338, 340-<br>370, 375-399,<br>401-427, 430-<br>436, 439-453,<br>494-500<br><b>(72.4%)</b> | 7-35, 72-76,<br>92-97, 99-<br>104, 118-127,<br>190-194, 211-<br>215, 253-257,<br>262-270, 290-<br>307, 319-333,<br>342-354, 358-<br>371, 373-387,<br>389-405, 417-<br>422, 426-430,<br>436-440, 442-<br>449<br><b>(39.2%)</b> | 3-8, 14-33,<br>90-94, 119-<br>124, 128-<br>132, 253-<br>258, 264-<br>272, 286-<br>302, 316-<br>335, 337-<br>354, 360-<br>387, 390-<br>395, 417-<br>421, 495-500<br><b>(31.4%)</b> |
| <b>Nsp5</b><br>(306) | 13-26, 35-47,<br>63-82, 89-94,<br>101-118,<br>123-128,<br>141-162,<br>166-176,<br>196-215,<br>223-228,<br>246-251,<br>254-262,<br>280-287,<br>296-306<br><b>(55.55%)</b>                                                                                    | 65-69, 103-<br>107, 139-<br>143, 155-<br>159, 301-<br>306<br><b>(8.49%)</b>                                                                                                                                       | 15-23, 31-35,<br>68-78, 80-84,<br>101-107, 109-<br>121, 143-166,<br>199-218, 221-<br>225, 227-238,<br>254-269, 281-<br>287, 295-301<br><b>(46.07%)</b>                                                                                               | 29-33, 36-44,<br>56-60, 74-78,<br>84-89, 102-<br>106, 112-117,<br>154-165, 200-<br>212, 217-222,<br>231-235, 260-<br>264<br><b>(26.8%)</b>                                                                                    | 16-24, 65-71,<br>112-117,<br>157-162,<br>201-212,<br>232-236,<br>302-306<br><b>(16.33%)</b>                                                                                       |
| <b>Nsp6</b><br>(290) | 6-11, 19-40,<br>45-52, 72-82,<br>113-118,<br>123-129,<br>141-155,<br>164-185,<br>187-197,<br>199-226,<br>241-251,<br>264-269,<br>283-290                                                                                                                    | 17-30, 33-<br>37, 41-45,<br>77-84, 90-<br>94, 120-<br>125, 150-<br>154, 171-<br>183, 211-<br>219,<br><b>(24.13%)</b>                                                                                              | 9-43, 45-72,<br>74-86, 88-102,<br>110-129, 139-<br>156, 161-197,<br>199-250, 267-<br>281, 283-290<br><b>(83.44%)</b>                                                                                                                                 | 11-26, 31-38,<br>40-45, 47-60,<br>64-73, 76-86,<br>88-99, 112-<br>127, 138-155,<br>162-170, 180-<br>203, 208-246,<br>267-271, 273-<br>277<br><b>(66.56%)</b>                                                                  | 12-29, 31-40,<br>43-58, 66-73,<br>77-89, 91-95,<br>115-125,<br>141-153,<br>163-172,<br>176-204,<br>207-232,<br>237-245<br><b>(57.93%)</b>                                         |

|                       |                                                                                                                                                                                                                                                                                                                                                                     |                                                                                                                                                                                                                                                                                            |                                                                                                                                                                                                                                                                                                                                                                                                                                                                    |                                                                                                                                                                                                                                                                                                                                                                                                                                                                              |                                                                                                                                                   |
|-----------------------|---------------------------------------------------------------------------------------------------------------------------------------------------------------------------------------------------------------------------------------------------------------------------------------------------------------------------------------------------------------------|--------------------------------------------------------------------------------------------------------------------------------------------------------------------------------------------------------------------------------------------------------------------------------------------|--------------------------------------------------------------------------------------------------------------------------------------------------------------------------------------------------------------------------------------------------------------------------------------------------------------------------------------------------------------------------------------------------------------------------------------------------------------------|------------------------------------------------------------------------------------------------------------------------------------------------------------------------------------------------------------------------------------------------------------------------------------------------------------------------------------------------------------------------------------------------------------------------------------------------------------------------------|---------------------------------------------------------------------------------------------------------------------------------------------------|
|                       | <b>(55.51%)</b>                                                                                                                                                                                                                                                                                                                                                     |                                                                                                                                                                                                                                                                                            |                                                                                                                                                                                                                                                                                                                                                                                                                                                                    |                                                                                                                                                                                                                                                                                                                                                                                                                                                                              |                                                                                                                                                   |
| <b>Nsp7</b><br>(83)   | 6-18, 28-33,<br>51-63<br><b>(38.55%)</b>                                                                                                                                                                                                                                                                                                                            | 14-18<br><b>(6%)</b>                                                                                                                                                                                                                                                                       | 8-19, 29-33,<br>38-42, 50-63<br><b>(43.37%)</b>                                                                                                                                                                                                                                                                                                                                                                                                                    | 10-16, 27-31,<br>37-41, 53-61<br><b>(31.33%)</b>                                                                                                                                                                                                                                                                                                                                                                                                                             | 9-17, 30-34,<br>55-61<br><b>(25.30%)</b>                                                                                                          |
| <b>Nsp8</b><br>(198)  | 31-36, 44-49,<br>81-88, 102-<br>107, 114-124,<br>126-135,<br>145-172,<br>182-190<br><b>(42.42%)</b>                                                                                                                                                                                                                                                                 | 182-186<br><b>(3.62%)</b>                                                                                                                                                                                                                                                                  | 5-9, 11-15, 34-<br>38, 86-96, 122-<br>132, 148-158,<br>184-191<br><b>(28.2%)</b>                                                                                                                                                                                                                                                                                                                                                                                   | 88-96, 115-<br>122, 127-131,<br>151-156, 180-<br>188<br><b>(18.69%)</b>                                                                                                                                                                                                                                                                                                                                                                                                      | 89-93, 128-<br>133, 147-<br>151, 182-187<br><b>(11.11%)</b>                                                                                       |
| <b>Nsp9</b><br>(113)  | 28-33, 61-68,<br>72-77, 85-90,<br>101-106<br><b>(28.31%)</b>                                                                                                                                                                                                                                                                                                        | -                                                                                                                                                                                                                                                                                          | 39-45, 64-68,<br>85-94, 100-110<br><b>(30.08%)</b>                                                                                                                                                                                                                                                                                                                                                                                                                 | 29-33, 40-44,<br>51-55, 86-92<br><b>(19.47%)</b>                                                                                                                                                                                                                                                                                                                                                                                                                             | 87-91<br><b>(4.42%)</b>                                                                                                                           |
| <b>Nsp10</b><br>(139) | 9-18, 37-47,<br>50-58, 72-81,<br>98-103, 107-<br>123<br><b>(45.32%)</b>                                                                                                                                                                                                                                                                                             | 15-19<br><b>(3.59%)</b>                                                                                                                                                                                                                                                                    | 10-22, 39-48,<br>54-58, 70-79,<br>94-99, 113-127<br><b>(42.44%)</b>                                                                                                                                                                                                                                                                                                                                                                                                | 14-20, 42-47,<br>73-81, 117-<br>122<br><b>(20.14%)</b>                                                                                                                                                                                                                                                                                                                                                                                                                       | 13-19, 73-78,<br>116-122<br><b>(14.38%)</b>                                                                                                       |
| <b>NSP11</b><br>(13)  | 4-13<br><b>(76.9%)</b>                                                                                                                                                                                                                                                                                                                                              | 6-10<br><b>(38.46%)</b>                                                                                                                                                                                                                                                                    | 6-13<br><b>(61.53%)</b>                                                                                                                                                                                                                                                                                                                                                                                                                                            | 6-10<br><b>(38.46%)</b>                                                                                                                                                                                                                                                                                                                                                                                                                                                      | 8-13<br><b>(46.1%)</b>                                                                                                                            |
| <b>Nsp12</b><br>(932) | 4-16, 25-32,<br>34-39, 41-47,<br>66-73, ,85-<br>91, 93-98,<br>111-116,<br>142-152,<br>171-176,<br>185-193,<br>198-207,<br>220-239,<br>243-49, 313-<br>325, 329-347,<br>352-357,<br>359-369,<br>392-401,<br>404-411,<br>421-428,<br>435-440,<br>467-480,<br>490-498,<br>526-531,<br>535-540,<br>554-568,<br>577-592,<br>601-609,<br>632-638,<br>659-664,<br>670-680, | 34-38, 77-<br>81, 110-<br>114, 146-<br>150, 203-<br>207, 230-<br>234, 329-<br>333, 337-<br>341, 352-<br>356, 371-<br>375, 491-<br>495, 559-<br>563, 569-<br>573, 585-<br>590, 671-<br>675, 692-<br>697, 775-<br>779, 784-<br>788, 828-<br>832, 843-<br>847, 884-<br>888<br><b>(11.48%)</b> | 7-19, 29-37,<br>39-53, 66-75,<br>89-93, 97-103,<br>123-132, 142-<br>150, 173-177,<br>187-192, 199-<br>207, 218-226,<br>233-242, 244-<br>250, 265-271,<br>282-287, 310-<br>321, 329-338,<br>340-351, 366-<br>377, 396-406,<br>422-430, 436-<br>440, 464-480,<br>530-535, 538-<br>547, 557-566,<br>582-594, 596-<br>607, 628-638,<br>662-676, 689-<br>705, 742-763,<br>773-792, 838-<br>847, 855-867,<br>879-888, 899-<br>905, 919-926,<br>928-932<br><b>(44.7%)</b> | 6-10, 30-37,<br>46-50, 67-73,<br>99-105, 120-<br>133, 144-151,<br>172-176, 190-<br>194, 202-206,<br>214-218, 238-<br>247, 266-275,<br>280-292, 306-<br>319, 331-336,<br>346-350, 370-<br>375, 394-400,<br>405-409, 438-<br>443, 454-460,<br>467-474, 492-<br>496, 504-508,<br>513-517, 526-<br>530, 544-548,<br>628-639, 650-<br>655, 664-668,<br>725-733, 743-<br>751, 753-758,<br>783-789, 791-<br>795, 826-830,<br>842-846, 854-<br>862, 879-890,<br>900-907, 921-<br>926 | 239-245,<br>308-320,<br>335-345,<br>395-399,<br>438-443,<br>469-474,<br>560-565,<br>691-701,<br>785-791,<br>880-886,<br>902-906<br><b>(9.01%)</b> |

|                       |                                                                                                                                                                                                                                                                                                                                                                                                         |                                                                                                                                              |                                                                                                                                                                                                                                                                                                                                           |                                                                                                                                                                                                                                                            |                                                                                                                                |
|-----------------------|---------------------------------------------------------------------------------------------------------------------------------------------------------------------------------------------------------------------------------------------------------------------------------------------------------------------------------------------------------------------------------------------------------|----------------------------------------------------------------------------------------------------------------------------------------------|-------------------------------------------------------------------------------------------------------------------------------------------------------------------------------------------------------------------------------------------------------------------------------------------------------------------------------------------|------------------------------------------------------------------------------------------------------------------------------------------------------------------------------------------------------------------------------------------------------------|--------------------------------------------------------------------------------------------------------------------------------|
|                       | 689-710,<br>715-720,<br>742-747,<br>761-769,<br>773-780,<br>782-790,<br>813-821,<br>842-849,<br>855-865,<br>880-888,<br>925-932<br><b>(44.52%)</b>                                                                                                                                                                                                                                                      |                                                                                                                                              |                                                                                                                                                                                                                                                                                                                                           | <b>(32.19%)</b>                                                                                                                                                                                                                                            |                                                                                                                                |
| <b>Nsp13</b><br>(601) | 1-11, 24-50,<br>55-65, 67-74,<br>79-101, 106-<br>111, 120-126,<br>144-159,<br>179-185,<br>187-199,<br>205-214,<br>216-233,<br>235-240,<br>245-252,<br>262-267,<br>289-294,<br>300-310,<br>330-336,<br>346-376,<br>382-387,<br>394-401,<br>421-429,<br>447-457,<br>474-486,<br>491-501,<br>508-515,<br>520-526,<br>528-538,<br>541-551,<br>560-568,<br>570-578,<br>587-592,<br>596-601<br><b>(58.9%)</b> | 41-45, 191-<br>195, 255-<br>259, 266-<br>270, 295-<br>299, 395-<br>399, 421-<br>425, 478-<br>482, 494-<br>498, 542-<br>546<br><b>(8.31%)</b> | 1-11, 24-34,<br>36-46, 59-70,<br>83-95, 107-<br>111, 133-137,<br>146-156, 177-<br>186, 212-216,<br>219-233, 243-<br>253, 290-299,<br>301-313, 319-<br>323, 327-332,<br>351-363, 367-<br>377, 380-384,<br>394-401, 420-<br>433, 448-454,<br>471-484, 495-<br>501, 507-513,<br>522-528, 540-<br>549, 565-578,<br>585-590<br><b>(46.08%)</b> | 4-8, 18-33,<br>62-66, 69-73,<br>120-124, 163-<br>167, 178-187,<br>223-228, 245-<br>251, 291-300,<br>303-308, 353-<br>359, 370-374,<br>395-399, 426-<br>430, 453-457,<br>470-478, 497-<br>501, 508-513,<br>542-547, 559-<br>565, 571-577<br><b>(24.46%)</b> | 2-9, 44-48,<br>65-69, 222-<br>230, 252-<br>256, 292-<br>299, 305-<br>309, 354-<br>361, 543-<br>547, 571-575<br><b>(10.48%)</b> |
| <b>Nsp14</b><br>(527) | 3-19, 24-43,<br>100-105,<br>108-128,<br>159-171,<br>179-187,<br>194-202,<br>205-211,<br>214-224,                                                                                                                                                                                                                                                                                                        | 38-42, 114-<br>118, 160-<br>164, 194-<br>201, 232-<br>236, 293-<br>297, 380-<br>384, 417-<br>421, 459-                                       | 9-19, 28-38,<br>52-65, 82-92,<br>107-120, 152-<br>157, 159-172,<br>178-202, 228-<br>238, 240-246,<br>271-296, 312-<br>326, 363-369,                                                                                                                                                                                                       | 50-60, 71-75,<br>81-89, 147-<br>155, 159-169,<br>181-188, 196-<br>200, 225-229,<br>233-243, 245-<br>249, 274-282,<br>284-288, 313-                                                                                                                         | 28-32, 114-<br>122, 181-<br>187, 226-<br>230, 233-<br>239, 380-<br>387, 442-<br>447, 503-512<br><b>(10.81%)</b>                |

|                       |                                                                                                                                                                                               |                                                                                                                                                             |                                                                                                                                                                                              |                                                                                                                                                   |                                                                                     |
|-----------------------|-----------------------------------------------------------------------------------------------------------------------------------------------------------------------------------------------|-------------------------------------------------------------------------------------------------------------------------------------------------------------|----------------------------------------------------------------------------------------------------------------------------------------------------------------------------------------------|---------------------------------------------------------------------------------------------------------------------------------------------------|-------------------------------------------------------------------------------------|
|                       | 228-236,<br>240-245,<br>275-280,<br>285-290,<br>307-322,<br>325-333,<br>346-351,<br>377-386,<br>395-402,<br>416-421,<br>434-439,<br>443-448,<br>455-479,<br>502-512<br><b>(56.9%)</b>         | 463, 507-<br>511<br><b>(10.05%)</b>                                                                                                                         | 379-389, 396-<br>404, 444-449,<br>461-466, 468-<br>479, 496-515<br><b>(44.78%)</b>                                                                                                           | 317, 348-352,<br>365-370, 381-<br>387, 396-401,<br>403-407, 443-<br>447, 472-477,<br>492-497, 506-<br>513, 515-522<br><b>(30.36%)</b>             |                                                                                     |
| <b>Nsp15</b><br>(346) | 5-14, 22-43,<br>51-56, 79-88,<br>94-106, 116-<br>125, 129-134,<br>139-153,<br>160-187,<br>190-197,<br>231-240,<br>273-280,<br>285-298,<br>301-306,<br>309-331,<br>336-342<br><b>(56.64%)</b>  | 23-28, 34-<br>43, 65-69,<br>76-80, 82-<br>86, 95-104,<br>119-123,<br>139-144,<br>164-169,<br>175-179,<br>181-186,<br>275-279,<br>301-307<br><b>(23.41%)</b> | 1-7, 24-33, 35-<br>40, 51-56, 68-<br>77, 79-85, 96-<br>106, 116-124,<br>143-148, 162-<br>177, 180-184,<br>216-222, 230-<br>237, 245-254,<br>273-280, 289-<br>304, 306-334<br><b>(49.44%)</b> | 55-59, 83-88,<br>120-124, 132-<br>136, 212-216,<br>222-226, 230-<br>238, 249-253,<br>277-281, 292-<br>301, 326-333,<br>339-343<br><b>(21.09%)</b> | 82-86, 97-<br>102, 118-<br>122, 248-<br>252, 291-<br>296, 319-323<br><b>(9.53%)</b> |
| <b>Nsp16</b><br>(298) | 34-39, 43-49,<br>53-58, 66-72,<br>78-84, 115-<br>122, 124-131,<br>148-157,<br>162-172,<br>190-198,<br>2020-208,<br>225-230,<br>237-242,<br>258-263,<br>270-275,<br>285-297<br><b>(41.27%)</b> | 27-31, 48-<br>52, 109-<br>113, 124-<br>129, 204-<br>208, 225-<br>229, 278-<br>282,<br><b>(9.04%)</b>                                                        | 38-61, 63-71,<br>84-89, 124-<br>131, 149-161,<br>163-172, 179-<br>197, 203-211,<br>225-233, 238-<br>250, 252-260,<br>270-279, 290-<br>294<br><b>(48.32%)</b>                                 | 15-23, 48-59,<br>63-70, 84-90,<br>124-130, 149-<br>156, 185-195,<br>226-232, 269-<br>274<br><b>(25.17%)</b>                                       | 50-62, 66-70,<br>150-156,<br>186-196,<br>225-231<br><b>(14.42%)</b>                 |

**Supplementary table 7:** NetChop 3.1 prediction of 20S proteasome cleavage site in structural proteins of SARS-CoV-2. The red colored residues represent the cleavage site while the underlined and bold residues are APRs predicted by FISH Amyloid server.



| Protein Name | Distribution of predicted 20s proteasome cleavage sites                                                                                                                                                                                                                                                                                                                                                                                                                                                                                                                                                                                                                                                                                                                                                                                                                                                                                                                                                                                                                                                                                                                                                                                                                                                                                                                                                                                                                                                                                                                                                                                                                                                                                                                                                                                                                                                                                                  | Distribution of cleavage sites in aggregation prone regions (APR)                                     |
|--------------|----------------------------------------------------------------------------------------------------------------------------------------------------------------------------------------------------------------------------------------------------------------------------------------------------------------------------------------------------------------------------------------------------------------------------------------------------------------------------------------------------------------------------------------------------------------------------------------------------------------------------------------------------------------------------------------------------------------------------------------------------------------------------------------------------------------------------------------------------------------------------------------------------------------------------------------------------------------------------------------------------------------------------------------------------------------------------------------------------------------------------------------------------------------------------------------------------------------------------------------------------------------------------------------------------------------------------------------------------------------------------------------------------------------------------------------------------------------------------------------------------------------------------------------------------------------------------------------------------------------------------------------------------------------------------------------------------------------------------------------------------------------------------------------------------------------------------------------------------------------------------------------------------------------------------------------------------------|-------------------------------------------------------------------------------------------------------|
| Spike        | <p>1-MFVFLVLLPLVSSQCVNLTTRTQQLPPAYTN-30<br/> 31-SFTRGVYYPDKVFRSSVLHSTQDLFLPFFS-60<br/> 61-NVTWFHAIHVSGTNGTKRFDNPVLPFNDGV-90<br/> 91-YFASTEKSNIIRGWIFGTTLDSTKQSLLIY-120<br/> 121-NNATNVVIKVCDFQFCNDPFLGVYYHKNNK-150<br/> 151-SWMESEFRVYSSANNCTFEYVSQPFLMDLE-180<br/> 181-GKQGNFKNLREFVFNIDGYEKIYSKHTPI-210<br/> 211-NLVRDLPQGFSALEPLVDLPIGINITRFQT-240<br/> 241-LLALHRSYLTPGDSSSGWTAGAAAYYVGYL-270<br/> 271-QPRTFLLKYNENGTITDAVDCALDPLSETK-300<br/> 301-CTLKSFVTEKGIYQTSNFRVQPTEIVRFP-330<br/> 331-NITNLCPFGEVFNATRFASVYAWNRRKRISN-360<br/> 361-CVADYSVLYNSASESTFKCYGVSPTKLNLDL-390<br/> 391-CFTNVYADSFVIRGDEVROIAPGQTGKIAD-420<br/> 421-YNKLPDDFTGCVIAWNSNNLDSKVGGNYN-450<br/> 451-YLRYLFRKSNLKPFERDISTEIQAGSTPC-480<br/> 481-NGVEGFNCYFPLQSYGFQPTNGVGYQPYRV-510<br/> 511-VVLSFELLHAPATVCGPKKSTNLVKNKCVN-540<br/> 541-FNFNGLTGTGVLTESNKKFLPFQFGRDIA-570<br/> 571-DTTDAVRDPQTEILDITPCSEGGVSVITP-600<br/> 601-GTNTSNQVAVLYQDVNCTEVPVAIHADQLT-630<br/> 631-PTWRVYSTGSNVFQTRAGCLIGAEHVNNNSY-660<br/> 661-ECDIPIGAGICASYQTQTNPRRARSVASQ-690<br/> 691-SIIAYTMSLGAENSVAYSNSIAIPTNFTI-720<br/> 721-SVTTEILPVSMTKTSVDCTMYICGDSTEC-750<br/> 751-NLLQYGSFCTQLNRALTGIAVEQDKNTQE-780<br/> 781-VFAQVKQIYKTPPIKDFGGFNFSQILPDPS-810<br/> 811-KPSKRSFIEDLLFNKVTLADAGFIKQYGDC-840<br/> 841-LGDIAARDLICAQKFNGLTVLPPLTDEMI-870<br/> 871-AQYTSALLAGTITSGWTFGAGAALQIPFAM-900<br/> 901-QMAYRFNGIGVTQNVLYENQKLIANQFNSA-930<br/> 931-IGKIQDSLSTASALGKLQDVVNQNAQALN-960<br/> 961-TLVKQLSSNFGAISSVLNDILSRDKVEAE-990<br/> 991-VQIDRLITGRLOSLOQTYVTQQLIRAAEIRAS-1020<br/> 1021-ANLAATKMSECVLGQSKRVDFCGKGYHLM-1050<br/> 1051-FPQSA PHGVVFLHVTYVPAQEKNF T TAPAI-1080<br/> 1081-CHDGKAHFPREGVVFVSNGTHWFVTQRNFYE-1110<br/> 1111-PQIITTDNTFVSGNCDVVIGIVNNTVYDPL-1140<br/> 1141-QPELDSFKEELDKYFKNHTSPDVDLGDIG-1170<br/> 1171-INASVVNIQKEIDRLNEVAKNLNESLIDLQ-1200<br/> 1201-ELGKYEQYIKWPWYIWLGFIAGLIAIVMVT-1230<br/> 1231-IMLCCMTSCCCLKGCCSCGSCCKFDEDD-1260<br/> 1261-EPVLKGVKLLHYT-1273</p> | <p>Total sites: 196 (15%)<br/> Sites within APR: 34 (17.34%)<br/> Sites outside APR: 162 (82.65%)</p> |
| Envelope     | <p>1-MYSFVSEETGLIVNSVLLFLAFVVFLLVT-30<br/> 31-LAILTALRLCA YCCNIVN VSLVKP S F Y V Y S-60</p>                                                                                                                                                                                                                                                                                                                                                                                                                                                                                                                                                                                                                                                                                                                                                                                                                                                                                                                                                                                                                                                                                                                                                                                                                                                                                                                                                                                                                                                                                                                                                                                                                                                                                                                                                                                                                                                              | <p>Total sites: 17 (22%)</p>                                                                          |

|                     |                                                                                                                                                                                                                                                                                                                                                                                                                                                                                                                                                                                                                                             |                                                                                                    |
|---------------------|---------------------------------------------------------------------------------------------------------------------------------------------------------------------------------------------------------------------------------------------------------------------------------------------------------------------------------------------------------------------------------------------------------------------------------------------------------------------------------------------------------------------------------------------------------------------------------------------------------------------------------------------|----------------------------------------------------------------------------------------------------|
|                     | 61-RVKNLNSSRVPDLLV-75                                                                                                                                                                                                                                                                                                                                                                                                                                                                                                                                                                                                                       | Sites within APR: 6<br>(35.30%)<br>Sites outside APR: 11<br>(64.70%)                               |
| <b>Membrane</b>     | 1-MADSNGTITVEELKKLLEQWNLVIGFLFLT-30<br>31-WICLLQFAYANRN <u>RFLYIIKLIFLWLL</u> WPV-60<br>61-TLACFVLA <u>AVYRI</u> NWITGGIAIAMACLVGL-90<br>91-MWLSYFIAS <u>FRLE</u> FARTRSMWSENPETNILL-120<br>121- <u>NVPL</u> HGTILTRPLLESELVIGAVILRGHLR-150<br>151- <u>IAGHHLGR</u> CDIKDLPKEITVATSR <u>TL</u> SYK-180<br>181-LGASQRVAGDSGFAA <u>YSRYRIGN</u> YKLN <u>TDH</u> -210<br>211-SSSSDN <u>IALLVQ</u> -222                                                                                                                                                                                                                                         | Total sites: 58 (26%)<br>Sites within APR: 16<br>(27.59%)<br>Sites outside APR: 42<br>(72.41%)     |
| <b>Nucleocapsid</b> | 1-MSDNGPQNQRNAPRITFGGPSDSTGSNQNG-30<br>31-ERSGARSKQRRPQGLPNNTASWFTALTQH-60<br>61-KEDLKFRGQGVPIINTNSSPDDQIGYYRRA-90<br>91-TRRIRGGDGKMKDLSRWYFYLLGTGPEAG-120<br>121-LPYGANKDGIWVATEGALNTPKDHIGTRN-150<br>151-PANNAAIV <u>LQLPQ</u> GTTLPKGFYAEGSRGGS-180<br>181-QASSRSSSRNSSRNSTPGSSRGTSARM-210<br>211-AGNGGDAALALLLLDRLNQLESKMSGK <u>GQQ</u> -240<br>241- <u>QOGQ</u> TVTKKSAEASKKPRQKRTATKAYNV-270<br>271-TQAFGRRGPEQTQGNFGDQELIRQGTDYKH-300<br>301-WPQIAQFAPSASAFFGMSRIGMEVTPSGTW-330<br>331-LTYTGAIKLDDKDPNFK <u>DOVIL</u> LNKHIDAY-360<br>361-KTFPTEPKKDKKKKADETQALPQ <u>ROKKQ</u> -390<br>391-TVTLPAADLDDFS <u>KQLQQ</u> SMSSADSTQA-419 | Total sites: 39<br>(9.30%)<br>Sites within APR: 4<br>(10.25%)<br>Sites outside APR: 35<br>(89.74%) |

**Supplementary table 8:** NetChop 3.1 prediction of 20S proteasome cleavage site in accessory proteins of SARS-CoV-2. The red colored residues represent the cleavage site while the underlined and bold residues are APRs predicted by FISH Amyloid server.

| Protein Name | Distribution of predicted 20s proteasome cleavage sites                                                                                                                                                                                                                                                                                                                                                                 | Distribution of cleavage sites in aggregation prone regions (APR)                               |
|--------------|-------------------------------------------------------------------------------------------------------------------------------------------------------------------------------------------------------------------------------------------------------------------------------------------------------------------------------------------------------------------------------------------------------------------------|-------------------------------------------------------------------------------------------------|
| <b>ORF3A</b> | 1-MDLFMRIFTIGTVTLKQGEIKDATPSDFVR-30<br>31-ATATIPIQASLPFGWLVIGVALLAVFQSAS-60<br>61-KIITLKKRWQLALSKGVHFVCNLLL <u>LFVT</u> V-90<br>91-YSHLLLVAAGLEAPFLYLYALVYFLOSINF-120<br>121- <u>VRIMRL</u> WLCWKCRSKNPLLYDANYFLCWH-150<br>151-TNCYDYCIPYNSVTSSIVITSGDGTTPIS-180<br>181-EHDYQIGGYTEKWESEGVKDCVVLHSYFTSD-210<br>211-Y <u>QLY</u> STQLSTDTGVEHVTFIYNKIVDEP-240<br>241-EEHVQIHTIDGSSGVNPNVMEPIYDEPTTT-270<br>271-TSVPL-275 | Total sites: 50 (18.18%)<br>Sites within APR: 17<br>(34.0%)<br>Sites outside APR: 33<br>(66.0%) |
| <b>ORF3B</b> | 1-MMPTIFAGILIVTTIVYLTIV-22                                                                                                                                                                                                                                                                                                                                                                                              | Total sites: 6 (27.2%)                                                                          |

|              |                                                                                                                                                                                                |                                                                                                  |
|--------------|------------------------------------------------------------------------------------------------------------------------------------------------------------------------------------------------|--------------------------------------------------------------------------------------------------|
|              |                                                                                                                                                                                                | Sites within APR: 2<br>(33.33%)<br>Sites outside APR: 4<br>(66.66%)                              |
| <b>ORF6</b>  | 1-MFHLVDFQVTIAE <u>ILLI</u> MRTFKVSIWNLD-30<br>31- <u>YIINLI</u> KNLSKSLTENKYSQLDEEQPMEI-60<br>61-D                                                                                            | Total sites: 10 (16.39%)<br>Sites within APR: 6<br>(60.0%)<br>Sites outside APR: 4<br>(40%)      |
| <b>ORF7A</b> | 1-MKI <u>LFLAL</u> ITLATCE <u>LYHYQ</u> ECVRGTTVL-30<br>31-LKEPCSSGTYEENSPFHPLADNKFALTCFS-60<br>61-TQFAFACPDGVKHVYQLRARSVSPKLFIRQ-90<br>91-EEVQELYSP <u>IFLIVA</u> IVFITLCFTLKRKT-120<br>121-E | Total sites: 20 (16.52%)<br>Sites within APR: 9<br>(45.0%)<br>Sites outside APR: 11<br>(55.0%)   |
| <b>ORF7B</b> | 1-MIELSLIDFYLC <u>FLAFL</u> FLVLI <u>MLIIF</u> WF-30<br>31-SLELQDHNETCHA-43                                                                                                                    | Total sites: 19 (44.18%)<br>Sites within APR: 12<br>(63.16%)<br>Sites outside APR: 7<br>(36.84%) |
| <b>ORF8</b>  | 1-MKFLVFLGIITTVAAFHQECSLQSQCTQHQP-30<br>31-YVVDDPCPIHFYSKWYIRVGARKSAPLIEL-60<br>61-CVDEAGSKSPIQYIDIGNYTVSCLPFTINC-90<br>91-QEPKLGSLVVRCSFYED <u>FLEY</u> HDVRVVLDF-120<br>121-I                | Total sites: 19 (15.70%)<br>Sites within APR: 5<br>(26.31%)<br>Sites outside APR: 14<br>(73.68%) |
| <b>ORF9B</b> | 1-MDPKISEMHPALRLVDPQIQLA VTRMENA V-30<br>31-GRDQNNVGP <u>KVYPII</u> LRLGSPSLNMARKT-60<br>61-LNSLEDKAFQLTPIAVQMTKLATTEELPDE-90<br>91-FVVVTVK-97                                                 | Total sites: 12 (12.37%)<br>Sites within APR: 1<br>(8.33%)<br>Sites outside APR: 11<br>(91.66%)  |
| <b>ORF10</b> | 1-MGYINVFAFPFTIYSLLLCRMNSRNYIAQV-30<br>31- <u>DVVN</u> FNLT-38                                                                                                                                 | Total sites: 9 (23.68%)<br>Sites within APR: 2<br>(22.22%)<br>Sites outside APR: 7<br>(77.77%)   |
| <b>ORF14</b> | 1-MLQSCYNFLKEQHQCQKASTQKGAEAAVKPL-30<br>31-LVPHHVVA <u>TVQEI</u> QLQA AVGELLLLEWLAM-60<br>61-AVMLLLLCCCLTD-73                                                                                  | Total sites: 13 (17.80%)<br>Sites within APR: 1<br>(7.69%)<br>Sites outside APR: 12<br>(92.31%)  |

**Supplementary table 9:** NetChop 3.1 prediction of 20S proteasome cleavage site in non-structural proteins of SARS-CoV-2. The red colored residues represent the cleavage site while the underlined and bold residues are APRs predicted by FISH Amyloid server.

| Protein Name | Distribution of predicted 20s proteasome cleavage sites                      | Distribution of cleavage sites in aggregation prone regions (APR) |
|--------------|------------------------------------------------------------------------------|-------------------------------------------------------------------|
| <b>NSP1</b>  | 1-MESLVPGFNEKTHVQLSLPVLQVRDVLVRG-30<br>31-FGDSVEEVLSEARQHLLKDGTCGLVEVEKGV-60 | Total sites: 19 (10.5%)                                           |

|             |                                                                                                                                                                                                                                                                                                                                                                                                                                                                                                                                                                                                                                                                                                                                                                                                                                                                                                                                                                                                                                                                                                                                                                                                                                                                                                                                                                                                                                                                                                                                                                                                         |                                                                                                                         |
|-------------|---------------------------------------------------------------------------------------------------------------------------------------------------------------------------------------------------------------------------------------------------------------------------------------------------------------------------------------------------------------------------------------------------------------------------------------------------------------------------------------------------------------------------------------------------------------------------------------------------------------------------------------------------------------------------------------------------------------------------------------------------------------------------------------------------------------------------------------------------------------------------------------------------------------------------------------------------------------------------------------------------------------------------------------------------------------------------------------------------------------------------------------------------------------------------------------------------------------------------------------------------------------------------------------------------------------------------------------------------------------------------------------------------------------------------------------------------------------------------------------------------------------------------------------------------------------------------------------------------------|-------------------------------------------------------------------------------------------------------------------------|
|             | <p>61-LPOLEQPYVFIK<u>R</u>SDARTAPHGHVMVELVA-90<br/> 91-ELEGIOYGR<u>S</u>GETLGVLVPHVGEIPVAYRK-120<br/> 121-VLLRKNGNKGAGGHSYGADLKSFDLGDELG-150<br/> 151-TDPYEDFQENWNTKHSSGVTR<u>ELM</u>RELNGG-180</p>                                                                                                                                                                                                                                                                                                                                                                                                                                                                                                                                                                                                                                                                                                                                                                                                                                                                                                                                                                                                                                                                                                                                                                                                                                                                                                                                                                                                     | <p>Sites within APR: 1<br/> (5.26%)<br/> Sites outside APR: 18<br/> (94.74%)</p>                                        |
| <p>NSP2</p> | <p>1-AYTRYVDNNFCGPDGYPLECIKDLLA<u>R</u>AGK-30<br/> 31-ASCTLSEQLD<u>F</u>IDTKRGVYCCREHEHEIAW-60<br/> 61-YTERSEKSYELQTPFEIKLAKK<u>F</u>DTFN<u>G</u>EC-90<br/> 91-PNFV<u>F</u>PLNSIIKTIQPRVEKKKLD<u>G</u>FMGRI-120<br/> 121-RSVYPVASPNECNQM<u>C</u>LSTLMKCDHCGETS-150<br/> 151-WQTGDFVKATCEFCGTENLTKEGATTCGYL-180<br/> 181-PQNA<u>V</u>VKIYCPACHNSEVGPEHSLAEYHNE-210<br/> 211-SGLKTILRKGGRTIAFGGCVFSYV<u>G</u>CHNKC-240<br/> 241-AYWVPRASANIGCNHT<u>G</u>VVGE<u>G</u>SEGLNDNL-270<br/> 271-LEILQKEKVNINIVGDFKLN<u>E</u>IAIILASF-300<br/> 301-SASTSAFVETV<u>K</u>GLDYKAFKQIV<u>E</u>SCGNFK-330<br/> 331-VTKGKAKKGAWNIGE<u>Q</u>SILSPLYAFASEA-360<br/> 361-AR<u>V</u>RSI<u>F</u>SR<u>T</u>LETAQNSVRVLQKAAITIL-390<br/> 391-DGISQYSLRLIDAM<u>M</u>FTSDLATNNLV<u>V</u>MAY-420<br/> 421-ITGGV<u>V</u>Q<u>L</u>TSQWLT<u>N</u>IEGTVYEKLKPVLDW-450<br/> 451-LEEK<u>F</u>KE<u>G</u>VE<u>F</u>LRDGWEI<u>V</u>K<u>F</u>ISTCACEIV-480<br/> 481-GGQIVTCAKEIKES<u>V</u>OT<u>F</u>FKLVNKFLALCA-510<br/> 511-DSIIIGGAKLKALNLGET<u>F</u>VTHSKGLYRK-540<br/> 541-VKSRE<u>T</u>GLLMPLKAPKEI<u>I</u>LE<u>G</u>ETLPTE-570<br/> 571-VLTEE<u>V</u>LKTGDLQPLEQ<u>P</u>TS<u>E</u>AVEAPLVG-600<br/> 601-TPVC<u>I</u>NGLM<u>L</u>LEIKDTEKYCALAPNMM<u>V</u>TN-630<br/> 631-NT<u>F</u>TLKGG-638</p>                                                                                                                                                                                                                                                                                                                                     | <p>Total sites: 76<br/> (11.91%)<br/> Sites within APR: 7<br/> (9.21%)<br/> Sites outside APR: 69<br/> (90.79%)</p>     |
| <p>NSP3</p> | <p>1-APTK<u>V</u>TFGDDT<u>V</u>IEVQGYKS<u>V</u>NITFELDER-30<br/> 31-IDKVL<u>N</u>EKCSAYT<u>V</u>ELGTEVNEFACVVADA-60<br/> 61-VIKTLQPV<u>S</u>ELLTPLGIDLDEWS<u>M</u>ATY<u>L</u>F-90<br/> 91-DESGEFL<u>A</u>SHMY<u>C</u>SFYPPDEDEEEGDCEE-120<br/> 121-EEFEPSTQY<u>E</u>YGTEDDYQGKPLEFGATSAA-150<br/> 151-LQPEEQEEDWLD<u>D</u>DSQQT<u>V</u>GQDGS<u>E</u>DNQ-180<br/> 181-TTTI<u>Q</u>TIVEVQP<u>L</u>EMELTP<u>V</u>Q<u>T</u>IEVNS<u>F</u>-210<br/> 211-<u>S</u>G<u>Y</u>L<u>K</u>L<u>T</u><u>D</u>N<u>V</u><u>I</u>I<u>K</u>N<u>A</u>DIV<u>E</u>EAKKVKPTV<u>V</u>-240<br/> 241-<u>N</u>A<u>A</u>N<u>V</u><u>Y</u>L<u>K</u>H<u>G</u>G<u>V</u>A<u>G</u>ALNKATNNAMQVESD-270<br/> 271-DYI<u>A</u>TNGPLKVGGSCVLSGHNLAKHCLHVV-300<br/> 301-GPNVNKGEDIQLLKSAY<u>E</u>NFNQHEVLL<u>A</u>PL-330<br/> 331-LSAGIFGADPIHSLRVC<u>V</u>DTV<u>R</u>TNVY<u>L</u>AVF-360<br/> 361-<u>D</u>KNLY<u>D</u>KL<u>V</u>SS<u>F</u>LEM<u>K</u>SE<u>K</u>OVE<u>Q</u>KIAEIPK-390<br/> 391-EEVKPFITESKPSVEQRKQDDKKIKACVEE-420<br/> 421-VTTTLEETKFL<u>T</u>EN<u>L</u>LLY<u>I</u>DINGNLHP<u>D</u>SA-450<br/> 451-<u>T</u>L<u>V</u>SD<u>I</u>DITFLK<u>K</u>DAPY<u>V</u>GDV<u>V</u>QEG<u>V</u>L<u>T</u>A-480<br/> 481-VVIPTKKAGGTTEMLAKALRKVP<u>T</u>D<u>N</u>Y<u>I</u>TT-510<br/> 511-<u>Y</u>PGQ<u>L</u>NGYTV<u>E</u>EAKTVLKKCK<u>S</u>AF<u>Y</u>ILPS-540<br/> 541-IISNEKQEILGT<u>V</u>SWNL<u>R</u>EMLAHA<u>E</u>TR<u>K</u>L-570<br/> 571-MPVC<u>V</u>ETKA<u>I</u>V<u>S</u>T<u>I</u>Q<u>R</u>K<u>Y</u>KGIK<u>I</u>QEG<u>V</u><u>V</u><u>D</u><u>Y</u>-600<br/> 601-GAR<u>F</u>Y<u>F</u>YTSKTT<u>V</u>ASLINTL<u>N</u>DLNETLV<u>T</u>M-630</p> | <p>Total sites: 293<br/> (15.05%)<br/> Sites within APR: 51<br/> (17.40%)<br/> Sites outside APR: 242<br/> (82.60%)</p> |

631-PLGYVTHGLNLEEAARYMRS LKVPATVSVS-660  
661-SPDAVTAYNGYLTSSSKTPEEHFIETISLA-690  
691-GSYKDWSYSGQSTQLGIEFLKRGDKSVYYT-720  
721-SNPTTFHLDGEVITFDNLKTL LSLREVRTI-750  
751-KVFTTVDNINLHTQVV DMSMTYGQQFGPTY-780  
781-LDGADVTKIKPHNSHEGKTFYVLPNDDTLR-810  
811-VEAFEYYHTTDP SFLGRYMSALNHTKKWKY-840  
841-PQVNGLT SIKWADNNCYLATALTLQQIEL-870  
871-KFNPPALQDAYYRARAGEAANFCALILAYC-900  
901-NKTVGELGDVRETMSYLFQHANLDSCKRVL-930  
931-NVVCKTCGQQQTTLKGVEAVMYMGTLSYEQ-  
960  
961-FKKGVQIPCTCGKQATKYL VQQESPFVMM S-990  
991-APPAQYELKHGTFTCA SEYTGNYQCGHYKH-  
1020  
1021-ITSKETLYCIDGALLTKSSEYKGPITDV FY-1050  
1051-KENSYTTTIKPVTYKLDGVVCTEIDPKLDN-  
1080  
1081-YYK KDNSYFTEQPIDLVPNQYPNA SFDNF-  
1110  
1111-KFVCDNIK FADDLNQLTG YKKPASRELKVT-  
1140  
1141-FFPDLNGDVVAIDYKHYTPSFKKGAKLLHK-  
1170  
1171-PIVWHVNNATNKATYKPNTWCIRCLWSTKP-  
1200  
1201-VETSNSFDVLKSEDAQGM DN LACEDLK PVS-  
1230  
1231-EEVVENPTIQKDVLECNVKTTEVVGD IIL-1260  
1261-KPANNSLKITEEVGHTDLM AAYVDNSSLTI-  
1290  
1291-KKPNELSRVLGLKTLATHGLAAVNSVPWDT-  
1320  
1321-IANYAKPFLNKVVS TTTNIVTRCLNRVCTN-  
1350  
1351-YMPYFFLLLQLCTFTRSTNSRIKASMP TT-1380  
1381-IAKNTVKSVGKFCLEASFNYLKS PNFSKLI-1410  
1411-NIIWFLLLSVCLGSLIYSTAA LGVLM SNL-1440  
1441-GMP SYCTGYREGYLNSTNVTIATYCTGSIP-1470  
1471-CSVCLSGLDSDTYP SLETIQITISSFKWD1500  
1501-LTAFGLVAEWFLAYILFTRFFYV LGLAAIM-  
1530  
1531-QLFFSYFAVHFISNSWLMWLIINLVQMAPI-  
1560  
1561-SAMVRMYIFFASFYYVWKS YVHVVDGCNSS-  
1590  
1591-TCMMC YKRN RATRVECTTIVNGVR RSFYVY-  
1620  
1621-ANGGKGFCCLKHNWNCVNC DTFCAGSTFISD-  
1650  
1651-EVARDLSLQFKRPINPTDQSSYIVDSVTVK-1680

|                                   |                                                                                                                                                                                                                                                                                                                                                                                                                                                                                                                                                                                                                                                                                                                                                                                                                                                                                                                                                                                                                                                                                                                                                                                                                                                                                                                                                                                                                                                                     |                                                                                                                                      |
|-----------------------------------|---------------------------------------------------------------------------------------------------------------------------------------------------------------------------------------------------------------------------------------------------------------------------------------------------------------------------------------------------------------------------------------------------------------------------------------------------------------------------------------------------------------------------------------------------------------------------------------------------------------------------------------------------------------------------------------------------------------------------------------------------------------------------------------------------------------------------------------------------------------------------------------------------------------------------------------------------------------------------------------------------------------------------------------------------------------------------------------------------------------------------------------------------------------------------------------------------------------------------------------------------------------------------------------------------------------------------------------------------------------------------------------------------------------------------------------------------------------------|--------------------------------------------------------------------------------------------------------------------------------------|
|                                   | <p>1681-NGSIHL YFDKAGQKTYERHLSHFVNLDNL-1710<br/> 1711-RANNTKGS L <u>PINVI</u> VFDGKSKCEESSAKSA-1740<br/> 1741-SVYYSQLMCQPILLDQALVSDVGDSAEVA-1770<br/> 1771-VKM <u>FDAYVNT</u> FSSSTFNVPMEK L KTLVATAE-1800<br/> 1801-AELAKN <u>VSLDNV</u> <u>LSTFI</u> SAARQGFV DSDVE-1830<br/> 1831-TKD VVECL <u>LKLSHQ</u> SDIEVTGDSCN <u>NYMLTY</u> -1860<br/> 1861-NKVENMTPRDLGACIDCS ARHINAQVAKSH-1890<br/> 1891-NIALIWN <u>VKDFMS</u> LSEQLRKQIRSAAKKNN-1920<br/> 1921-LPFK <u>LTCAT</u> TRQ <u>VVNV</u> VTTKIALKGG-1946</p>                                                                                                                                                                                                                                                                                                                                                                                                                                                                                                                                                                                                                                                                                                                                                                                                                                                                                                                                                  |                                                                                                                                      |
| <p align="center"><b>NSP4</b></p> | <p>1-KIVNNWLKQLIK <u>VTLVFLF</u> <u>VAAIF</u> FYLITPV-30<br/> 31-HVMSKHTDF <u>SSEII</u> GYKAIDG <u>GVTRDI</u> AST-60<br/> 61-DTC <u>FANKHAD</u> FDTWFS <u>QRGGS</u> YTNDAKACPL-90<br/> 91-IAAVIT <u>RE</u> VGFV <u>VPGLPG</u> TIL <u>RRTNG</u> <u>GDFLH</u> -120<br/> 121-<u>FLPRV</u> <u>FSAVGNIC</u> YTPSKLIE YTD FATSAC-150<br/> 151-VLAAECTIFKDASGKPVYCY <u>YD</u> TNVLEGSV-180<br/> 181-A <u>YESLR</u> PDTRY <u>V</u> LMDGSIIQFPNTYLEGSV-210<br/> 211-RV <u>VTTFD</u> SEY <u>CRHGT</u> CERSEAGVC <u>V</u> STSGR-240<br/> 241-WV <u>LNN</u> DYYRSL <u>PGVFC</u> <u>GVD</u> AVN <u>LL</u> TNMFTP-270<br/> 271-LIQPIGALDISASIVAG <u>GIVAIV</u> VTCL <u>LAYY</u> -300<br/> 301-<u>FM</u> <u>FRRA</u> FGEYSHV <u>VAFNTLL</u> FLMSFTVLC-330<br/> 331-LTPV <u>YSFL</u> <u>PGVYS</u> <u>VIYLYL</u> TFYLTND <u>V</u> SFL-360<br/> 361-<u>AHIQ</u> <u>WVM</u> FTPLVPFWITIA <u>YIIC</u> ISTKHF-390<br/> 391-<u>YWF</u> FS <u>NYL</u> <u>KRRV</u> <u>V</u> <u>FNG</u> <u>V</u> <u>S</u> <u>F</u> <u>S</u> <u>T</u> <u>F</u> <u>E</u> <u>E</u> <u>A</u> <u>A</u> <u>L</u> <u>C</u> <u>T</u> <u>F</u> -420<br/> 421-<u>LLN</u> <u>KEM</u> YL <u>K</u> <u>L</u> <u>R</u> <u>S</u> <u>D</u> <u>V</u> <u>L</u> <u>L</u> <u>P</u> <u>L</u> <u>T</u> <u>Q</u> <u>Y</u> <u>N</u> <u>R</u> <u>Y</u> <u>L</u> <u>A</u> <u>L</u> <u>Y</u> <u>N</u> <u>K</u> -450<br/> 451-<u>YKY</u> FSGAMDTTSYRE <u>AAC</u> CHLAKALNDFSN-480<br/> 481-SG <u>SDVLY</u> <u>QPPQ</u> TSITS AVLQ-500</p> | <p align="center">Total sites: 109<br/> (21.8%)<br/> Sites within APR: 20<br/> (18.34%)<br/> Sites outside APR: 89<br/> (81.66%)</p> |
| <p align="center"><b>NSP5</b></p> | <p>1-SGFRK <u>MA</u> FSGKVEGCMVQ <u>V</u> TCGTTTL <u>NGL</u> -30<br/> 31-WLDDV <u>VY</u> CPRHVICTSEDMLNPNY <u>ED</u> LLIR-60<br/> 61-KSN <u>HN</u> FLV <u>QA</u> GNVQLRVIGH <u>S</u> MQNCVLK <u>LK</u> -90<br/> 91-VDTANPKTPK <u>YKF</u> <u>VRIQ</u> PGQT <u>F</u> SVLACYNG-120<br/> 121-SPSGVYQ <u>CAM</u> <u>RPN</u> FTIK <u>G</u> <u>S</u> <u>FL</u> <u>NG</u> SCGSVGF-150<br/> 151-NIDY <u>DC</u> <u>V</u> <u>S</u> <u>F</u> <u>C</u> <u>M</u> <u>H</u> <u>H</u> <u>M</u> <u>E</u> <u>L</u> <u>P</u> <u>T</u> <u>G</u> <u>V</u> <u>H</u> <u>A</u> <u>G</u> <u>T</u> <u>D</u> <u>L</u> <u>E</u> <u>G</u> <u>N</u> -180<br/> 181-FYGP <u>FV</u> DRQTAQAAGTDTTIT <u>V</u> NV <u>LAW</u> LYA-210<br/> 211-AVING <u>DR</u> WFL <u>NR</u> FTTL <u>N</u> DFNLVAMKY <u>NYE</u> -240<br/> 241-PLT <u>Q</u> <u>D</u> <u>H</u> <u>V</u> <u>D</u> <u>I</u> <u>L</u> <u>G</u> <u>P</u> <u>L</u> <u>S</u> <u>A</u> <u>Q</u> <u>T</u> <u>G</u> <u>I</u> <u>A</u> <u>V</u> <u>L</u> <u>D</u> <u>M</u> <u>C</u> <u>A</u> <u>S</u> <u>L</u> <u>K</u> <u>E</u> -270<br/> 271-LLQNGMNGR <u>TIL</u> GSALLE <u>D</u> EFTPF <u>D</u> <u>V</u> <u>R</u> <u>Q</u> <u>C</u> -300<br/> 301-<u>SG</u> <u>V</u> <u>T</u> <u>F</u> <u>Q</u> -306</p>                                                                                                                                                                                                                                          | <p align="center">Total sites: 45<br/> (14.70%)<br/> Sites within APR: 4<br/> (8.88%)<br/> Sites outside APR: 41<br/> (91.12%)</p>   |
| <p align="center"><b>NSP6</b></p> | <p>1-SAVK <u>R</u> <u>T</u> <u>I</u> <u>K</u> <u>G</u> <u>T</u> <u>H</u> <u>H</u> <u>W</u> <u>L</u> <u>L</u> <u>T</u> <u>I</u> <u>L</u> <u>T</u> <u>S</u> <u>L</u> <u>L</u> <u>V</u> <u>L</u> <u>V</u> <u>O</u> <u>S</u> <u>T</u> <u>Q</u> -30<br/> 31-<u>W</u> <u>S</u> <u>L</u> <u>F</u> <u>F</u> <u>F</u> <u>L</u> <u>Y</u> <u>E</u> <u>N</u> <u>A</u> <u>F</u> <u>L</u> <u>P</u> <u>F</u> <u>A</u> <u>M</u> <u>G</u> <u>I</u> <u>A</u> <u>M</u> <u>S</u> <u>A</u> <u>F</u> <u>A</u> <u>M</u> <u>M</u> <u>F</u> <u>V</u> -60<br/> 61-KHKHAF <u>L</u> <u>C</u> <u>L</u> <u>F</u> <u>L</u> <u>P</u> <u>S</u> <u>L</u> <u>A</u> <u>T</u> <u>V</u> <u>A</u> <u>Y</u> <u>F</u> <u>N</u> <u>M</u> <u>V</u> <u>Y</u> <u>M</u> <u>P</u> <u>A</u> <u>S</u> <u>W</u> -90<br/> 91-<u>V</u> <u>M</u> <u>R</u> <u>I</u> <u>M</u> <u>T</u> <u>W</u> <u>L</u> <u>D</u> <u>M</u> <u>V</u> <u>D</u> <u>T</u> <u>S</u> <u>L</u> <u>S</u> <u>G</u> <u>F</u> <u>L</u> <u>K</u> <u>D</u> <u>C</u> <u>V</u> <u>M</u> <u>Y</u> <u>A</u> <u>S</u> <u>A</u> <u>V</u> -120</p>                                                                                                                                                                                                                                                                                                                                                                                                             | <p align="center">Total sites: 92<br/> (31.72%)<br/> Sites within APR: 30<br/> (32.60%)<br/> Sites outside APR: 62<br/> (67.40%)</p> |

|              |                                                                                                                                                                                                                                                                                                                                                                                                                                                                                                                                                                                                                                                                                                                                                                                                                                                                                                                                                                                                       |                                                                                                              |
|--------------|-------------------------------------------------------------------------------------------------------------------------------------------------------------------------------------------------------------------------------------------------------------------------------------------------------------------------------------------------------------------------------------------------------------------------------------------------------------------------------------------------------------------------------------------------------------------------------------------------------------------------------------------------------------------------------------------------------------------------------------------------------------------------------------------------------------------------------------------------------------------------------------------------------------------------------------------------------------------------------------------------------|--------------------------------------------------------------------------------------------------------------|
|              | <p>121-<b>VLLIL</b>MTARTVYDDGARRVWTLMNVLTL<b>VY</b>-150</p> <p>151-<b>KVYY</b>GNALDQAISM<b>WAL</b>IISVTSN<b>YSGVVT</b>-180</p> <p>181-<b>TVMFL</b>ARGIV<b>FM</b>CV<b>EYCP</b>I<b>FFIT</b>GN<b>TLQ</b>CI-210</p> <p>211-<b>MLVYCFLGY</b>FCT<b>CY</b>GL<b>FCLLN</b>RY<b>FRL</b>TLG-240</p> <p>241-<b>VYDYL</b>VSTQ<b>EFR</b>YMNSQGLLPPKNSIDAFK-270</p> <p>271-L<b>NIKLL</b>GVGGKPCIKVATVQ-290</p>                                                                                                                                                                                                                                                                                                                                                                                                                                                                                                                                                                                                       |                                                                                                              |
| <b>NSP7</b>  | <p>1-SKMSDVKCTSVVL<b>LSVLQQL</b>RV<b>ESS</b>SKL<b>WA</b>-30</p> <p>31-QCV<b>QL</b>HNDILL<b>AK</b>DTTEAF<b>EK</b>M<b>V</b>SLLSV<b>LL</b>-60</p> <p>61-SMQGAVDINKL<b>CE</b>EMLDN<b>R</b>ATLQ-83</p>                                                                                                                                                                                                                                                                                                                                                                                                                                                                                                                                                                                                                                                                                                                                                                                                     | <p>Total sites: 9 (10.84%)</p> <p>Sites within APR: 1 (11.11%)</p> <p>Sites outside APR: 8 (88.89%)</p>      |
| <b>NSP8</b>  | <p>1-AIASEFSSLPSY<b>AA</b>FATA<b>QEA</b>YEQAVANGD-30</p> <p>31-SEVVLK<b>KLK</b>SLN<b>VAK</b>SEFDRDAAM<b>QR</b>KLE-60</p> <p>61-KMADQAM<b>TQ</b>MY<b>KQ</b>AR<b>SE</b>DKRAK<b>VTS</b>AM<b>QTM</b>-90</p> <p>91-L<b>FTML</b>R<b>KL</b>DNDALNNI<b>IN</b>AR<b>DGC</b>VPLN<b>II</b>-120</p> <p>121-PLTTAA<b>KL</b>M<b>VV</b>IPD<b>YNT</b>Y<b>KNT</b>CDGTT<b>FTYA</b>-150</p> <p>151-SALWEIQ<b>VV</b>D<b>AD</b>SKIV<b>QL</b>SEISMDNS<b>PNL</b>-180</p> <p>181-A<b>WPLIV</b>TAL<b>R</b>ANSA<b>VKL</b>Q-198</p>                                                                                                                                                                                                                                                                                                                                                                                                                                                                                               | <p>Total sites: 20 (10.10%)</p> <p>Sites within APR: 2 (10.0%)</p> <p>Sites outside APR: 18 (90.0%)</p>      |
| <b>NSP9</b>  | <p>1-NNELSPVAL<b>RQ</b>MS<b>CA</b>AGTTQTACTDDN<b>ALA</b>-30</p> <p>31-<b>YY</b>NTTKGGRFV<b>LAL</b>LSDLQDL<b>KWA</b>RF<b>PKSD</b>-60</p> <p>61-GTGT<b>IY</b>TELEPPCR<b>FV</b>TDTPKGPK<b>VKYL</b>YF-90</p> <p>91-<b>IKGL</b>NNLN<b>RGM</b>VLGSLAATV<b>R</b>LQ-113</p>                                                                                                                                                                                                                                                                                                                                                                                                                                                                                                                                                                                                                                                                                                                                   | <p>Total sites: 16 (14.15%)</p> <p>Sites within APR: 0 (0.0%)</p> <p>Sites outside APR: 16 (100%)</p>        |
| <b>NSP10</b> | <p>1-AGNATEVPANSTV<b>LSFCA</b>F<b>AV</b>DA<b>AKA</b>Y<b>KDY</b>-30</p> <p>31-LASGGQPITNC<b>VKML</b>CTHTGTG<b>QAI</b>TV<b>PE</b>-60</p> <p>61-ANMD<b>QES</b>FGGAS<b>CLY</b>CR<b>CH</b>IDHPN<b>PKGFC</b>-90</p> <p>91-DLKGKY<b>VQ</b>IP<b>TC</b>ANDPV<b>GFTL</b>KNTV<b>CTVC</b>-120</p> <p>121-<b>GMW</b>K<b>GY</b>GCSCD<b>QL</b>REP<b>MLQ</b>-139</p>                                                                                                                                                                                                                                                                                                                                                                                                                                                                                                                                                                                                                                                  | <p>Total sites: 17 (12.23%)</p> <p>Sites within APR: 2 (11.76%)</p> <p>Sites outside APR: 15 (88.24%)</p>    |
| <b>NSP11</b> | <p>1-SADA<b>QSFL</b>NGFAV-13</p>                                                                                                                                                                                                                                                                                                                                                                                                                                                                                                                                                                                                                                                                                                                                                                                                                                                                                                                                                                      | <p>Total sites: 2 (15.38%)</p> <p>Sites within APR: 1 (50%)</p> <p>Sites outside APR: 1 (50%)</p>            |
| <b>NSP12</b> | <p>1-SADA<b>QSFLNR</b>VCGV<b>SAA</b>RLTPCGTGTSTDV-30</p> <p>31-<b>VYRA</b>F<b>DIY</b>NDKVAG<b>FA</b>K<b>FL</b>KT<b>NCC</b>RF<b>QEKD</b>-60</p> <p>61-EDDN<b>LID</b>SY<b>FVVKRH</b>T<b>S</b>NY<b>QHE</b>TIY<b>NLL</b>-90</p> <p>91-KDCPAV<b>AK</b>HDF<b>FKFR</b>IDG<b>DMVPH</b>ISRQ<b>RLT</b>-120</p> <p>121-KYT<b>MAD</b>L<b>VYAL</b>R<b>H</b>FDEGN<b>CD</b>TLKE<b>ILVTYN</b>-150</p> <p>151-<b>CCDD</b>DF<b>NK</b>KDWYDFVEN<b>PDIL</b>R<b>VYAN</b>L<b>GE</b>-180</p> <p>181-RVR<b>Q</b>ALL<b>KT</b>V<b>Q</b>FC<b>DAM</b>R<b>NAGIVGVLT</b>LD<b>NQ</b>-210</p> <p>211-DLNGNWYDFGDFIQTT<b>PG</b>SGVP<b>VVDSY</b>Y<b>SL</b>-240</p> <p>241-L<b>MPIL</b>T<b>L</b>RAL<b>TA</b>ESH<b>V</b>DTDLTK<b>PYIK</b>W<b>DL</b>-270</p> <p>271-<b>LK</b>YDFTEER<b>LKL</b>F<b>DRY</b>FK<b>YWD</b>Q<b>TY</b>HP<b>NCVN</b>-300</p> <p>301-CLDDRCIL<b>HCA</b>N<b>FNV</b>L<b>F</b>ST<b>VFP</b>P<b>TS</b>FG<b>PLV</b>-330</p> <p>331-<b>RKIF</b>V<b>DG</b>V<b>PFV</b>V<b>STGY</b>H<b>REL</b>G<b>VVHN</b>Q<b>DVN</b>-360</p> | <p>Total sites: 155 (16.63%)</p> <p>Sites within APR: 21 (13.54%)</p> <p>Sites outside APR: 134 (86.46%)</p> |

|              |                                                                                                                                                                                                                                                                                                                                                                                                                                                                                                                                                                                                                                                                                                                                                                                                                                                                                                                                                                                                                                                                                                                                                           |                                                                                                                       |
|--------------|-----------------------------------------------------------------------------------------------------------------------------------------------------------------------------------------------------------------------------------------------------------------------------------------------------------------------------------------------------------------------------------------------------------------------------------------------------------------------------------------------------------------------------------------------------------------------------------------------------------------------------------------------------------------------------------------------------------------------------------------------------------------------------------------------------------------------------------------------------------------------------------------------------------------------------------------------------------------------------------------------------------------------------------------------------------------------------------------------------------------------------------------------------------|-----------------------------------------------------------------------------------------------------------------------|
|              | <p>361-LHSSRLSFKE<u>LLVYA</u>ADPAMHAASGNLLLD-390<br/> 391-KRTTCFSVAAL<u>TNNV</u>AFQTVKPGNFNKDFY-420<br/> 421-DFAVSKGFFKEGSSVELKHFFFAQDGNAAI-450<br/> 451-<u>SDYDYRYN</u>LPTMCDIRQLLFVVEVVDK<del>YF</del>-480<br/> 481-DCYDGGCINAN<u>QVIV</u>NNLDKSAGFPFNK<del>WG</del>-510<br/> 511-KARLYYDSMSYEDQDALFA<del>YTKR</del>NVIPTIT-540<br/> 541-<u>QMNLKYAISAKNR</u>ARTVAGV<u>SICSTM</u>TN<u>RQ</u>-570<br/> 571-<u>FHQKLLKSIAATR</u>GATV<u>VIGT</u>SKFYGGWHN-600<br/> 601-MLKTVYSDVENPHLMGWDYPKCDRAMPNML-<br/> 630<br/> 631-RIMASLVLAR<u>KHTTCCSL</u>SHRFYRLANECA-660<br/> 661-QVLSEMVCMCG<u>GSLYV</u>KPGGTSSGDATTA<del>YA</del>-<br/> 690<br/> 691-<u>NSVFNIC</u>QAVTANVNALLSTDG<del>NKIADKY</del>V-720<br/> 721-<u>RNLQHRLYECLY</u>RNRD<del>VD</del>TDFVNEFYAYLR-750<br/> 751-KHFSMMILSDDAVVCFNSTYASQGLV<u>ASIK</u>-780<br/> 781-NFK<u>SVLYYQ</u>NNVFMSEAKCW<u>TET</u>DLTKGPH-810<br/> 811-EFCSQHTMLVKQGDDYV<u>YLPYP</u>DPSRILGA-840<br/> 841-GC<u>FVDDI</u>VKT<u>DG</u>TLMIERFVSLAIDAYPLT-870<br/> 871-KHPNQEYADV<u>FHLYLQYIRKLH</u><u>DEL</u>TGHML-900<br/> 901-<u>DMYSV</u>MLTNDNTSR<del>Y</del>WEPEFYEA<del>MY</del>TPHTV-<br/> 930<br/> 931-LQ-932</p> |                                                                                                                       |
| <p>NSP13</p> | <p>1-AVGACVLCNSQTS<u>LRCGACI</u>RRPFLCCKCC-30<br/> 31-YDHVISTSHK<u>LVL</u>SVNPYVCNAPGCDVTDV-60<br/> 61-TQLYLGGMSYCKSHKPPISFPLCANGQVF-90<br/> 91-GLYKNTCVGSDN<u>VTDF</u>NAIATCDW<u>TN</u>AGDY-120<br/> 121-ILANTCTERLKLFAAETLKATEETFKLSYG-150<br/> 151-IATVREVLSDRELHLSWEVKGPRPPLNRNY-180<br/> 181-VFTGYRVTKNSKVQIGEYTF<u>EKG</u>DYGDVAVV-210<br/> 211-YRGTTTYKLVGDYFVLT<u>SHTV</u>MPLSAPTL-240<br/> 241-VPQEHYVRITGLYPTLN<u>IS</u>DEFSSNV<u>ANYQ</u>-270<br/> 271-KVGMQKYSTLQPPGTGKSHFAIGL<u>LAL</u>YYP-300<br/> 301-SARIVYTACSHAADV<u>DALCE</u>KALKYLPIDKC-330<br/> 331-SRIIPARARVECFDKFKVNSTLEQYVFCTV-360<br/> 361-NALPETTADIVV<u>FDEIS</u>MATNYDLSVVNAR-390<br/> 391-LRAKH<u>YVYI</u>GDPAQLPAPRTLLTKGTLEPE-420<br/> 421-<u>YFNSV</u>CRLMKTIGPDM<u>FLG</u>TCRRCPAEIVD-450<br/> 451-TVSA<u>LVY</u>DNKLKAHKDKSAQC<u>FKM</u>FYK<u>GVI</u>-<br/> 480<br/> 481-<u>THD</u>VSSAINR<u>PQIGVV</u>REFLTRNPAWRKAV-510<br/> 511-FISPYNSQNAVASKILGLPTQTVDSSQGSE-540<br/> 541-YDYV<u>IF</u>TQTTETAHSCNVNRFNVAITRAKV-570<br/> 571-GILC<u>MS</u>DRDLYDKLQFTSLEIPRRNVATL-600<br/> 601-Q</p>                                                                              | <p>Total sites: 86<br/> (14.30%)<br/> Sites within APR: 9<br/> (10.47%)<br/> Sites outside APR: 77<br/> (89.53%)</p>  |
| <p>NSP14</p> | <p>1-AENV<u>TGL</u>FKDCSKVITGLHPTQAP<u>THL</u>SVD-30<br/> 31-TKFKTEGL<u>CV</u>DIPGIPKDMTYRRLISMMGF-60<br/> 61-KMNYQVNGYPNMFITREAIRHVR<u>AWI</u>GFD-90<br/> 91-VEGCHATREAVGTNLPLQLG<u>FSTG</u>VNLVAV-120<br/> 121-PTGYVDTPNNTDFSRVSAKPPPGDQFKHLI-150<br/> 151-PLMYKGLPWNV<u>VRI</u>KIVQMLSDTLKNLSDR-180</p>                                                                                                                                                                                                                                                                                                                                                                                                                                                                                                                                                                                                                                                                                                                                                                                                                                                | <p>Total sites: 99<br/> (18.78%)<br/> Sites within APR: 11<br/> (11.11%)<br/> Sites outside APR: 88<br/> (88.89%)</p> |





|                 |        |        |      |        |        |        |        |        |
|-----------------|--------|--------|------|--------|--------|--------|--------|--------|
| <b>SP-CoV2</b>  | 1668.1 | 1548.3 | 1241 | 1387   | 1670   | 1554.2 | 1228.3 | 1402.6 |
| <b>FP1-CoV</b>  | 1663   | 1560   | NC   | NC     | 1671.2 | 1562.5 | NC     | NC     |
| <b>FP2-CoV</b>  | 1665.9 | 1551.7 | 1250 | 1390.4 | 1672.2 | 1556.1 | 1236.9 | 1399.3 |
| <b>FP1-CoV2</b> | 1657.4 | 1554.5 | NC   | 1389   | 1672.7 | 1556   | 1235   | 1399   |
| <b>FP2-CoV2</b> | 1655.8 | 1554   | 1229 | 1385.5 | 1673.1 | 1552.2 | 1232.2 | 1396   |
| <b>ORF10</b>    | 1665.6 | 1565   | NC   | NC     | 1673.2 | 1566.2 | NC     | 1405.1 |

\*NC stands for not clear.

**Supplementary table 11.** Information of peptides and proteins used for *in vitro* aggregation assay.

| <b>Protein and peptide</b>   | <b>UniProt ID</b> | <b>Sequence</b>                                      | <b>Solvent</b>                                   | <b>Concentration used for <i>in vitro</i> aggregation</b> |
|------------------------------|-------------------|------------------------------------------------------|--------------------------------------------------|-----------------------------------------------------------|
| <b>SARS-CoV</b>              |                   |                                                      |                                                  |                                                           |
| S fusion peptide 1 (FP1-CoV) | P59594            | NH <sub>2</sub> -<br>SFIEDLLFNKVTLADAGF<br>MKQY-COOH | Water                                            | 1 mg/ml                                                   |
| S fusion peptide 2 (FP2-CoV) | P59594            | NH <sub>2</sub> -<br>KQYGECLGDINARDLICA<br>QKF-COOH  | Water                                            | 1 mg/ml                                                   |
| NSP11-CoV                    | P0C6U8            | NH <sub>2</sub> -SADASTFLNGFAV-<br>COOH              | 20 mM Sodium phosphate buffer (pH 7.4)           | 3 mg/ml                                                   |
| <b>SARS-CoV-2</b>            |                   |                                                      |                                                  |                                                           |
| S signal peptide (SP-CoV2)   | P0DTC2            | NH <sub>2</sub> -MFVFLVLLPLVS-<br>COOH               | 50% DMSO and 50% 20 mM phosphate buffer (pH 7.4) | 0.5 mg/ml                                                 |

|                                        |                    |                                                                         |                                                                |         |
|----------------------------------------|--------------------|-------------------------------------------------------------------------|----------------------------------------------------------------|---------|
| S fusion peptide 1 (FP1-CoV2)          | P0DTC2             | NH <sub>2</sub> -<br>SFIEDLLFNKVTLADAGFI<br>KQY-COOH                    | 50% DMSO and<br>50% 20 mM<br>phosphate buffer<br>(pH 7.4)      | 1 mg/ml |
| S fusion peptide 2 (FP2-CoV2)          | P0DTC2             | NH <sub>2</sub> -<br>KQYGDCLGDIAARDLICA<br>QKF-COOH                     | 10% DMSO and<br>90% 20 mM<br>phosphate buffer<br>(pH 7.4)      | 1 mg/ml |
| ORF10<br>(full-length protein)         | YP_009725<br>255.1 | NH <sub>2</sub> -<br>MGYINVFAFPFTIYSLLLC<br>RMNSRNYIAQVDVNFN<br>LT-COOH | 60% DMSO and<br>40% 20 mM<br>phosphate buffer<br>(pH 7.4)      | 1 mg/ml |
| NSP6-p<br>(Residues 91-112<br>of NSP6) | P0DTC1             | NH <sub>2</sub> -<br>VMRIMTWLDMVDTSLSG<br>FKLKD-COOH                    | 8% DMSO and<br>92% 20 mM<br>phosphate buffer<br>(pH 7.4)       | 1 mg/ml |
| NSP11-CoV2<br>(full-length)            | P0DTC1             | NH <sub>2</sub> -SADAQSFLNGFAV-<br>COOH                                 | 20 mM phosphate<br>buffer (pH 7.4)<br>containing 50 mM<br>NaCl | 3 mg/ml |

**Supplementary table 12.** Information of peptides given in mass spectrometry data in Supplementary Dataset.

| Name of the peptide | Sample name        | Sample ID     | Purity | Molecular Weight (Da) |
|---------------------|--------------------|---------------|--------|-----------------------|
| SP-CoV2             | CV2_Signal Peptide | U1200FK090-6  | 92.6%  | 1377.78               |
| FP1-CoV             | CoV1_S_FP1         | U083MGG030-1  | 97.5%  | 2550.93               |
| FP2-CoV             | CoV1_S_FP2         | U083MGG030-3  | 90.7%  | 2385.73               |
| FP1-CoV2            | Fusion Peptide 1   | U1200FK090-3  | 79%    | 2532.90               |
| FP2-CoV2            | Fusion Peptide 2   | U1200FK090-5  | Crude  | 2328.68               |
| ORF10               | Cov_ORF10          | A3893-6       | Crude  | 4449.24               |
| NSP6-p              | NSP6_90-112        | U521TFI050-14 | 88.5%  | 2587.10               |
| NSP11-CoV           | NSP11_CoV1         | U083MGG030-5  | 92.9%  | 1299.39               |
| NSP11-CoV2          | NSP11              | U4944FD210-1  | 72.9%  | 1326.42               |

### Supplementary Figures:

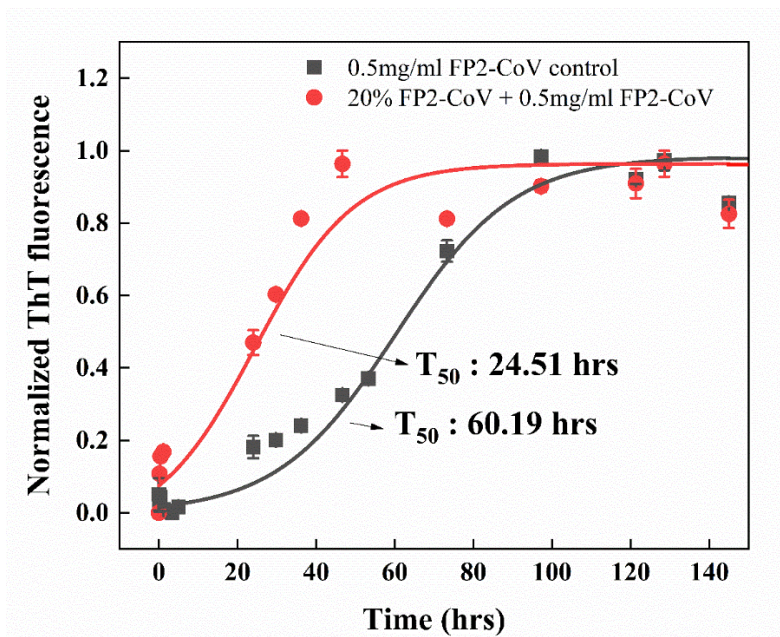

**Supplementary figure 1. Self-seeding activity of FP2-CoV peptide aggregates.** At 0.5 mg/ml concentration, the FP2-CoV peptide aggregation process has a  $T_{50}$  value of  $60.19 \pm \text{NC}$  hrs (at 1 mg/ml concentration,  $T_{50}$  is  $47.64 \pm 3.75$  hrs, as reported in the main manuscript). Upon addition of 20% FP2-CoV seeds (sonicated preformed amyloid fibrils), its  $T_{50}$  decreases to  $24.51 \pm \text{NC}$  hrs. The kinetics reactions are monitored using ThT fluorescence intensity at 490 nm, where dot (FP2-CoV + FP2-CoV seeds) and square symbols (FP2-CoV control) indicate the average value of two technical replicates and the error bar represents SEM of these replicates. The black- and red-coloured lines indicate the sigmoidal fittings of data points which determines the  $T_{50}$  values. These results show that the seeds catalyze the aggregation of peptides into amyloids. NC stands for not calculated. The source data are given in the Source Data file.

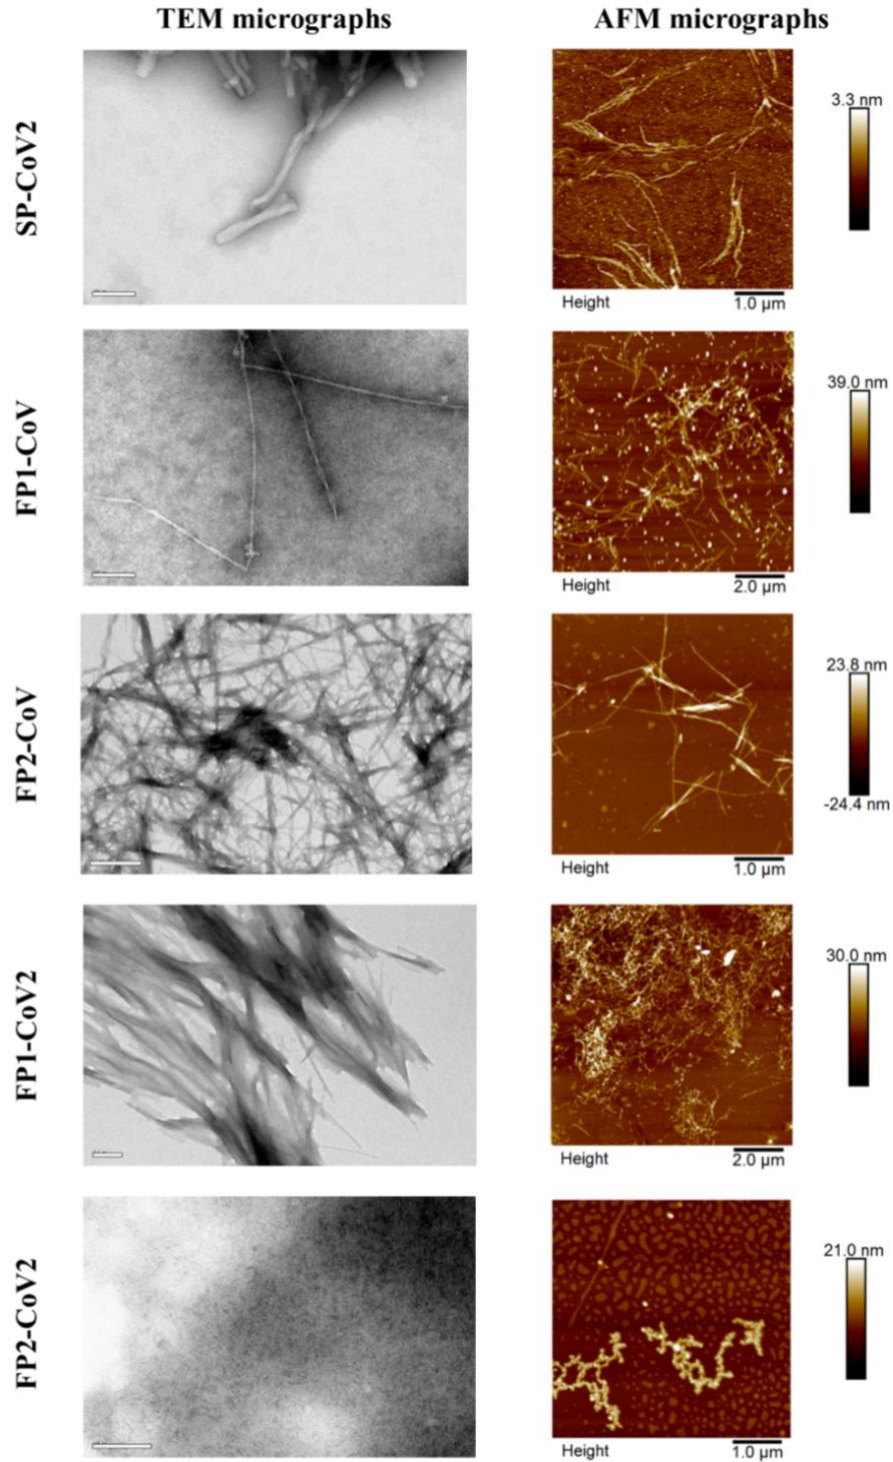

**Supplementary figure 2. TEM and AFM micrographs of SARS-CoV and SARS-CoV-2 peptides.** For TEM images, the scale bar represents 100 nm for SP-CoV2, FP1-CoV, and FP2-CoV2, 500 nm for FP2-CoV, and 200 nm for FP1-CoV2 peptide aggregates, respectively.

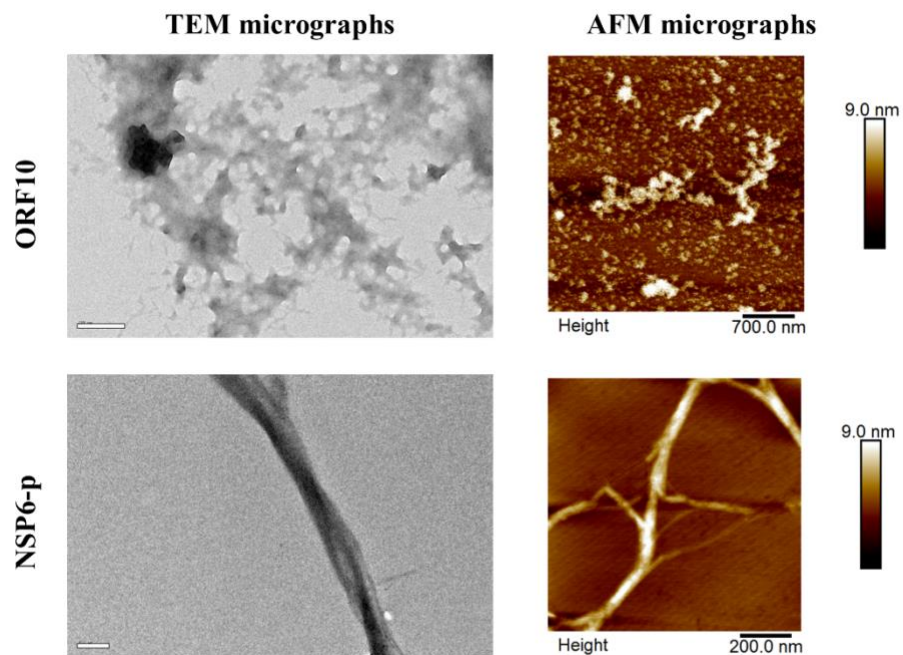

**Supplementary figure 3. TEM and AFM micrographs of SARS-CoV-2 peptides.** For TEM images, the scale bar represents 200 nm for ORF10 and NSP6-p peptide aggregates.

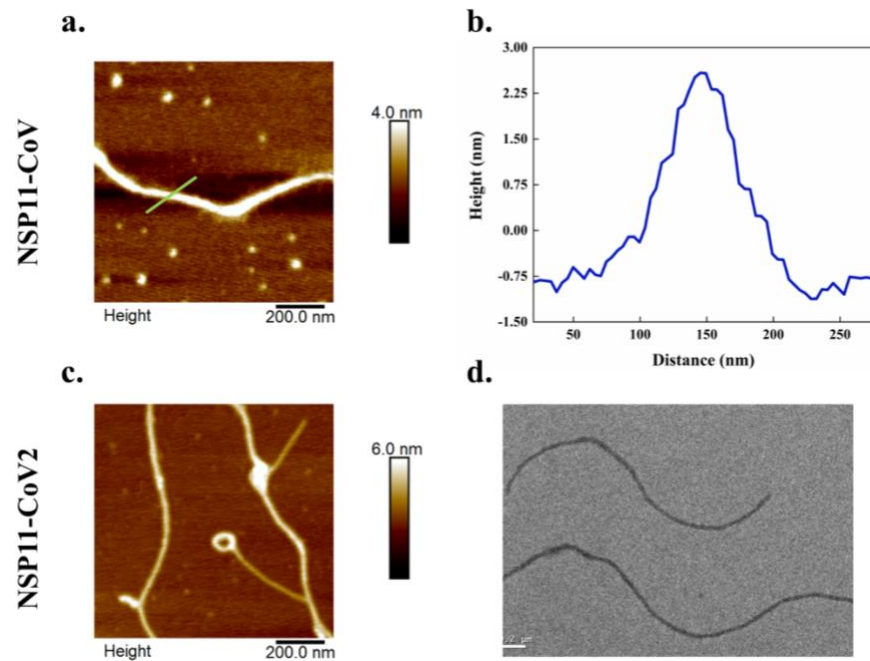

**Supplementary figure 4.** (a) AFM image of NSP11-CoV fibril. (b) Height profile of NSP11-CoV fibril shown with a green-colored line in panel a. (c) AFM image of NSP11-CoV2 fibrils. (d) HR-TEM micrograph of NSP11-CoV2; scale bar represents 200 nm. The source data are given in the Source Data file.

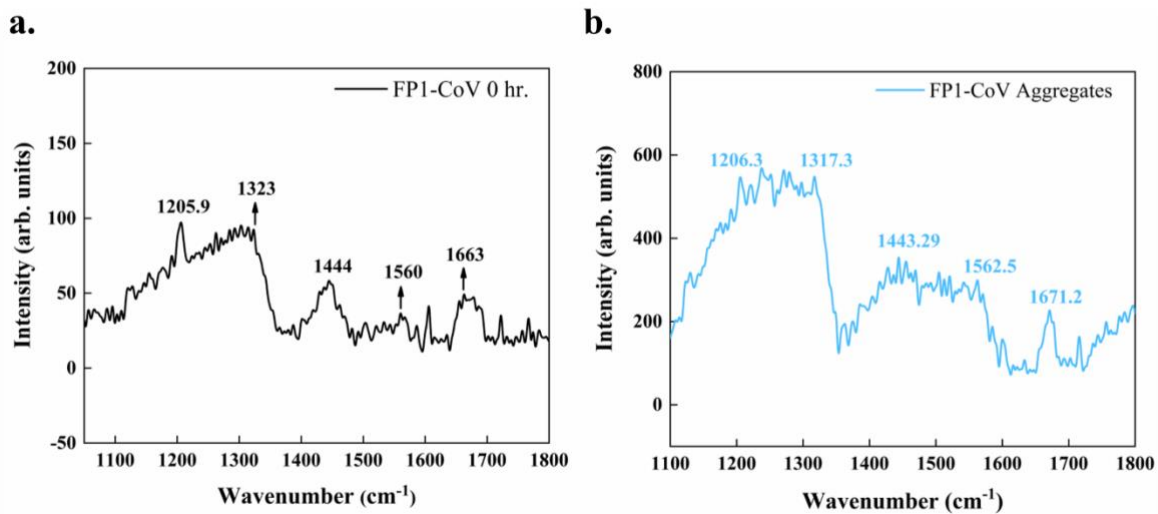

**Supplementary figure 5.** Raman spectra of monomer (a) and aggregates (b) of FP1-CoV. The spectral data was smoothed with 10 points using the FFT filter function. The source data are given in the Source Data file. Arb. units are arbitrary units.
