# Supplementary material
Source: PubMed Central journal article supplement (PMC9941124)
Supplement: 41467_2023_36234_MOESM3_ESM.pdf [file 41467_2023_36234_MOESM3_ESM.pdf]

## Description of Additional Supplementary Files

### Supplementary Data 1

- Mass spectrometry data of all peptides
