# Supplementary material
Source: PubMed Central journal article supplement (PMC9941124)
Supplement: 41467_2023_36234_MOESM4_ESM.pdf [file 41467_2023_36234_MOESM4_ESM.pdf]

Sample Name :CV2\_Signal Peptide  
 Sample ID :U1200FK090-6  
 Time Processed :1:40:56 PM  
 Month-Day-Year Processed :12/26/2020

Pump A : 0.065% trifluoroacetic in 100% water (v/v)  
 Pump B : 0.05% trifluoroacetic in 100% acetonitrile (v/v)  
 Total Flow:1 ml/min  
 Wavelength:220 nm

| Time  | Module     | Command | Value |
|-------|------------|---------|-------|
| 0.01  | Pumps      | B.Conc  | 5     |
| 25.00 | Pumps      | B.Conc  | 65    |
| 25.01 | Pumps      | B.Conc  | 95    |
| 26.00 | Pumps      | B.Conc  | 95    |
| 27.01 | Pumps      | B.Conc  | 5     |
| 35.00 | Controller | Stop    |       |

<<Column Performance>>

<Detector A>

Column : Inertsil ODS-3 4.6 x 250 mm

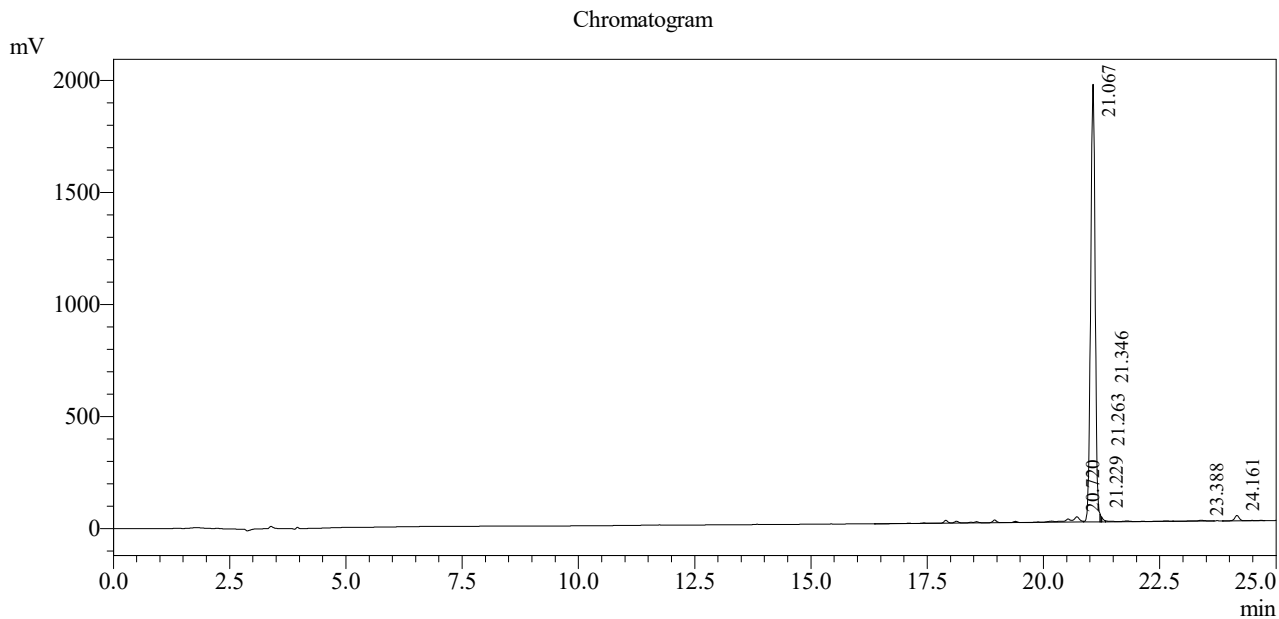

1 Detector A Channel 1 / 220nm

Peak Table

Detector A Channel 1 220nm

| Peak# | Ret. Time | Area     | Height  | Area %  |
|-------|-----------|----------|---------|---------|
| 1     | 20.720    | 675983   | 23657   | 4.759   |
| 2     | 21.067    | 13160527 | 1952551 | 92.643  |
| 3     | 21.229    | 51728    | 30595   | 0.364   |
| 4     | 21.263    | 48912    | 18384   | 0.344   |
| 5     | 21.346    | 81610    | 4022    | 0.574   |
| 6     | 23.388    | 33037    | 3120    | 0.233   |
| 7     | 24.161    | 153773   | 23290   | 1.082   |
| Total |           | 14205570 | 2055619 | 100.000 |

# Mass Spectrum

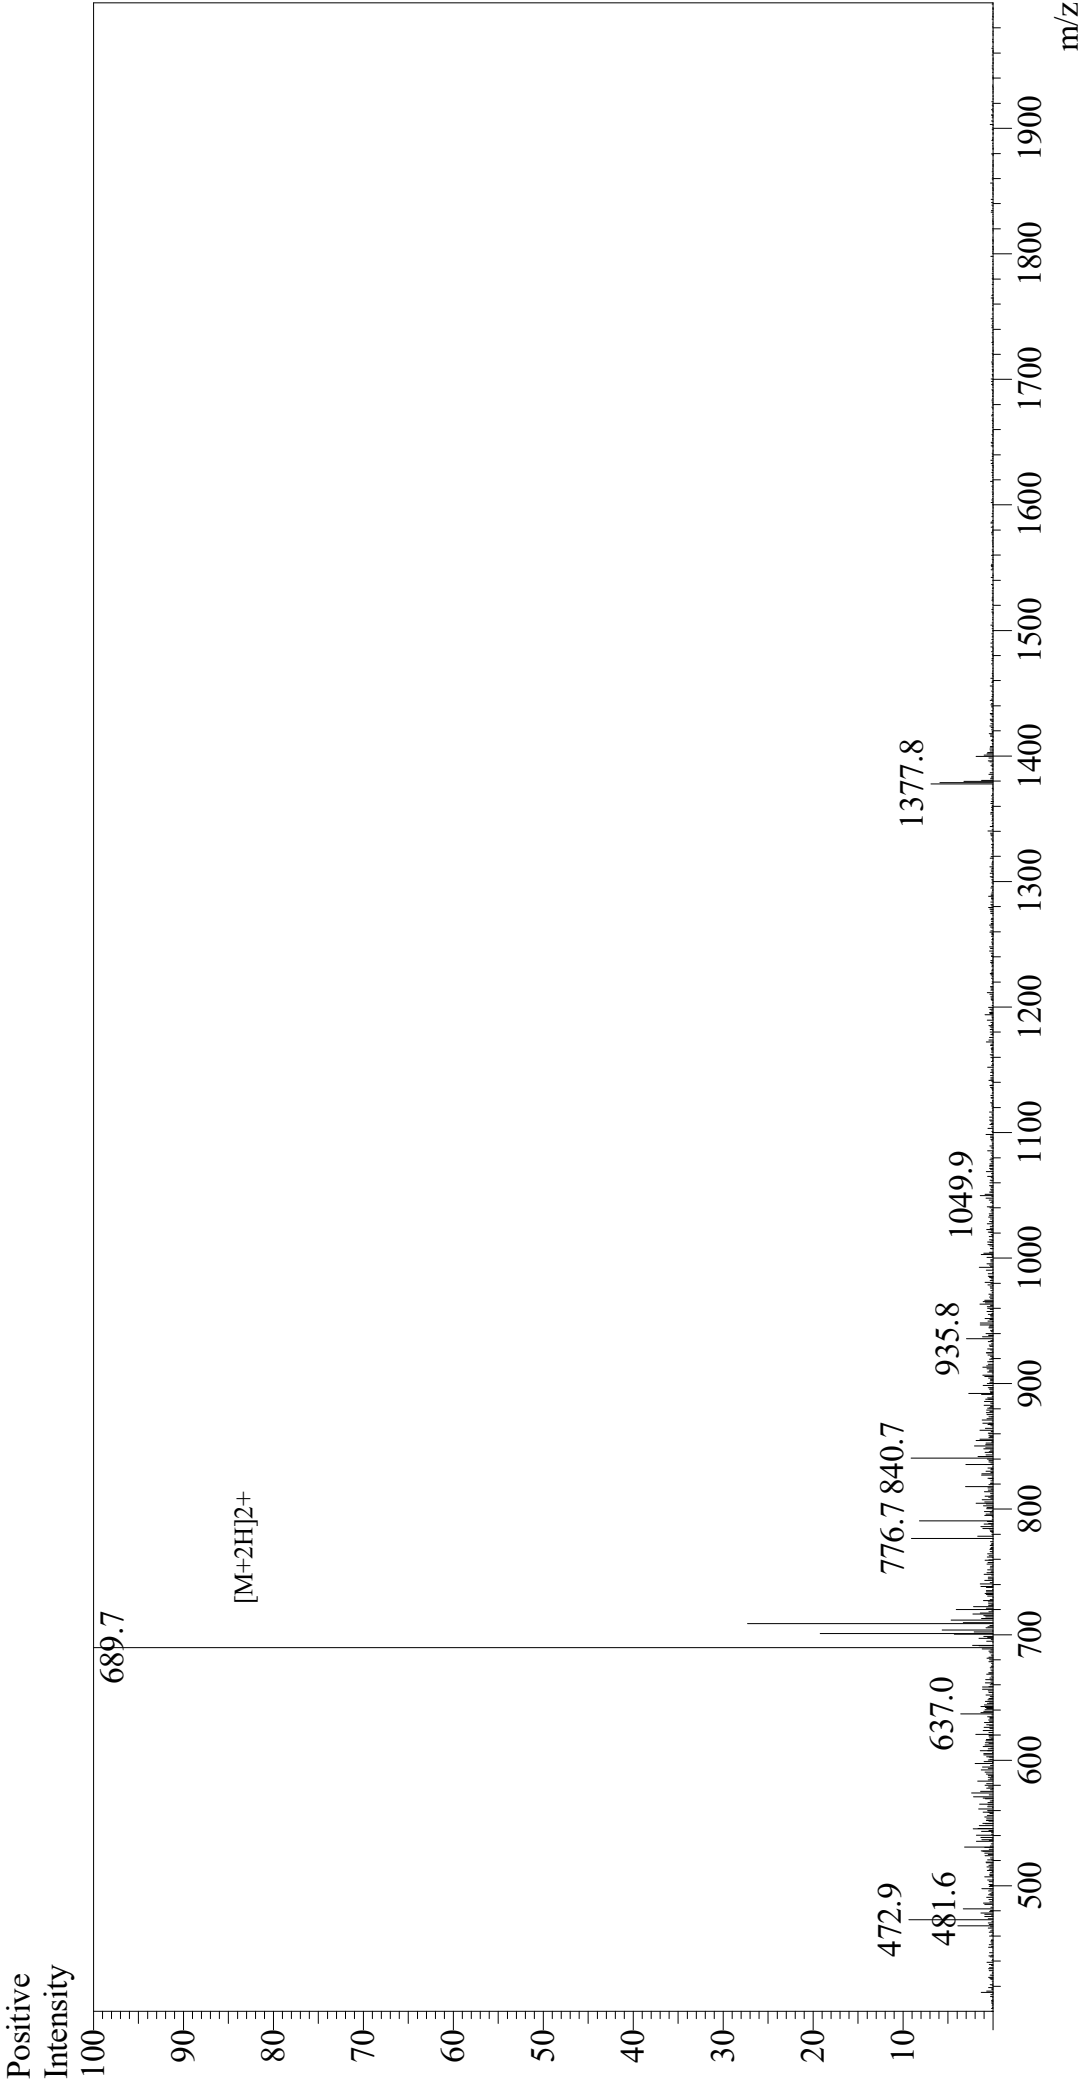

Sample Information  
Month-Day Processed : 12/26/20  
Time Processed : 3:37:21 PM  
Injection Volume : 0.4  
Sample Name : CV2\_Signal Peptide  
Sample ID : U1200FK090-6  
Theoretical MW : 1377.78  
Observed MW : 1377.4

Interface : ESI  
Nebulizing Gas Flow : 1.5L/min  
CDL Temp : 250  
Block Temp : 200

Equipment : GK11010007  
Interface Bias : +4.5 kV  
Drying Gas Flow : 5 L/min  
T.Flow : 0.2 ml/min  
B.conc : 50% H2O/50% MeOH

Sample Name :CoV1\_S\_FP1  
 Sample ID :U083MGG030-1  
 Time Processed :2:07:07 AM  
 Month-Day-Year Processed :09/07/2021

Pump A : 0.065% trifluoroacetic in 100% water (v/v)  
 Pump B : 0.05% trifluoroacetic in 100% acetonitrile (v/v)  
 Total Flow:1 ml/min  
 Wavelength:220 nm

<<LC Time Program>>

| Time  | Module     | Command | Value |
|-------|------------|---------|-------|
| 0.01  | Pumps      | B.Conc  | 5     |
| 25.00 | Pumps      | B.Conc  | 65    |
| 25.01 | Pumps      | B.Conc  | 95    |
| 27.00 | Pumps      | B.Conc  | 95    |
| 27.01 | Pumps      | B.Conc  | 5     |
| 35.00 | Pumps      | B.Conc  | 5     |
| 35.01 | Controller | Stop    |       |

<<Column Performance>>

<Detector A>

Column :Inertsil ODS-3 4.6 x 250 mm  
 Equipment: ZJ21010026

<Chromatogram>

mV

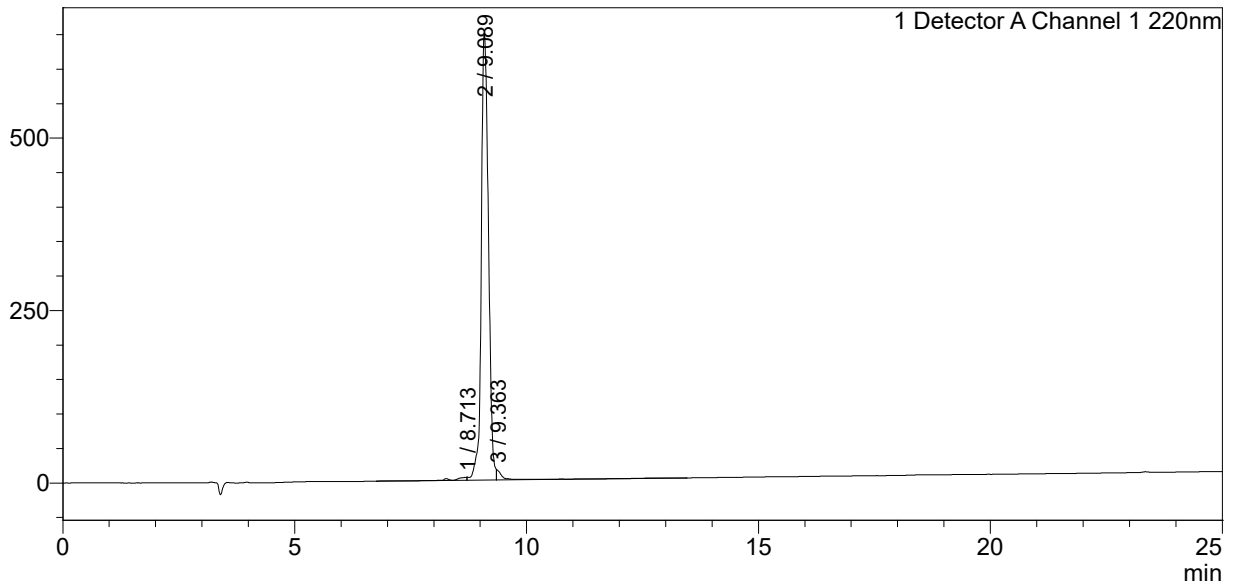

<Peak Table>

Detector A Channel 1 220nm

| Peak# | Ret. Time | Area    | Height | Area%   |
|-------|-----------|---------|--------|---------|
| 1     | 8.713     | 67324   | 4305   | 0.946   |
| 2     | 9.089     | 6933708 | 647309 | 97.456  |
| 3     | 9.363     | 113673  | 14864  | 1.598   |
| Total |           | 7114705 | 666479 | 100.000 |

Sample Name :CoV1\_S\_FP2  
 Sample ID :U083MGG030-3  
 Time Processed :9:53:08 AM  
 Month-Day-Year Processed :08/30/2021

Pump A : 0.065% trifluoroacetic in 100% water (v/v)  
 Pump B : 0.05% trifluoroacetic in 100% acetonitrile (v/v)  
 Total Flow:1 ml/min  
 Wavelength:220 nm

<<LC Time Program>>

| Time  | Module     | Command | Value |
|-------|------------|---------|-------|
| 0.01  | Pumps      | B.Conc  | 5     |
| 25.00 | Pumps      | B.Conc  | 65    |
| 25.01 | Pumps      | B.Conc  | 95    |
| 27.00 | Pumps      | B.Conc  | 95    |
| 27.01 | Pumps      | B.Conc  | 5     |
| 35.00 | Pumps      | B.Conc  | 5     |
| 35.01 | Controller | Stop    |       |

<<Column Performance>>

<Detector A>

Column :Inertsil ODS-3 4.6 x 250 mm  
 Equipment: ZJ21010026

<Chromatogram>

mV

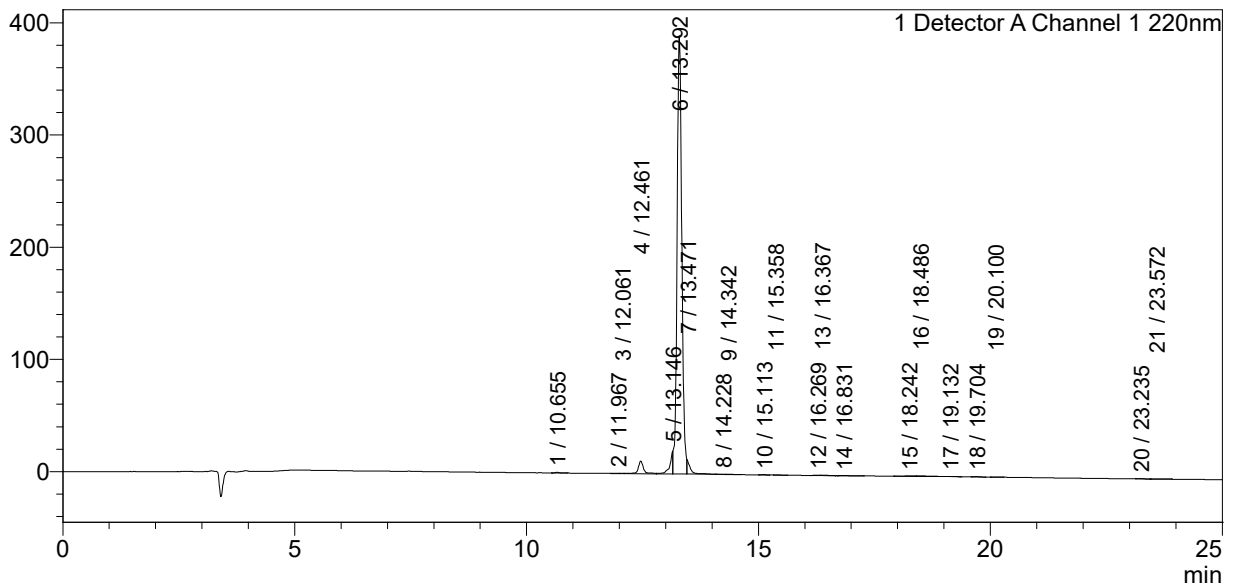

<Peak Table>

Detector A Channel 1 220nm

| Peak# | Ret. Time | Area    | Height | Area%  |
|-------|-----------|---------|--------|--------|
| 1     | 10.655    | 4016    | 588    | 0.130  |
| 2     | 11.967    | 1298    | 150    | 0.042  |
| 3     | 12.061    | 1125    | 204    | 0.037  |
| 4     | 12.461    | 90028   | 11203  | 2.922  |
| 5     | 13.146    | 87896   | 19076  | 2.852  |
| 6     | 13.292    | 2795913 | 390881 | 90.732 |
| 7     | 13.471    | 60288   | 12105  | 1.956  |
| 8     | 14.228    | 2004    | 248    | 0.065  |
| 9     | 14.342    | 2307    | 254    | 0.075  |
| 10    | 15.113    | 3469    | 440    | 0.113  |
| 11    | 15.358    | 1852    | 171    | 0.060  |
| 12    | 16.269    | 2615    | 277    | 0.085  |
| 13    | 16.367    | 3665    | 302    | 0.119  |
| 14    | 16.831    | 2134    | 122    | 0.069  |
| 15    | 18.242    | 6856    | 346    | 0.222  |
| 16    | 18.486    | 7927    | 421    | 0.257  |

| Peak# | Ret. Time | Area    | Height | Area%   |
|-------|-----------|---------|--------|---------|
| 17    | 19.132    | 1170    | 89     | 0.038   |
| 18    | 19.704    | 2703    | 374    | 0.088   |
| 19    | 20.100    | 1211    | 161    | 0.039   |
| 20    | 23.235    | 1896    | 272    | 0.062   |
| 21    | 23.572    | 1129    | 111    | 0.037   |
| Total |           | 3081506 | 437794 | 100.000 |

# Mass Spectrum

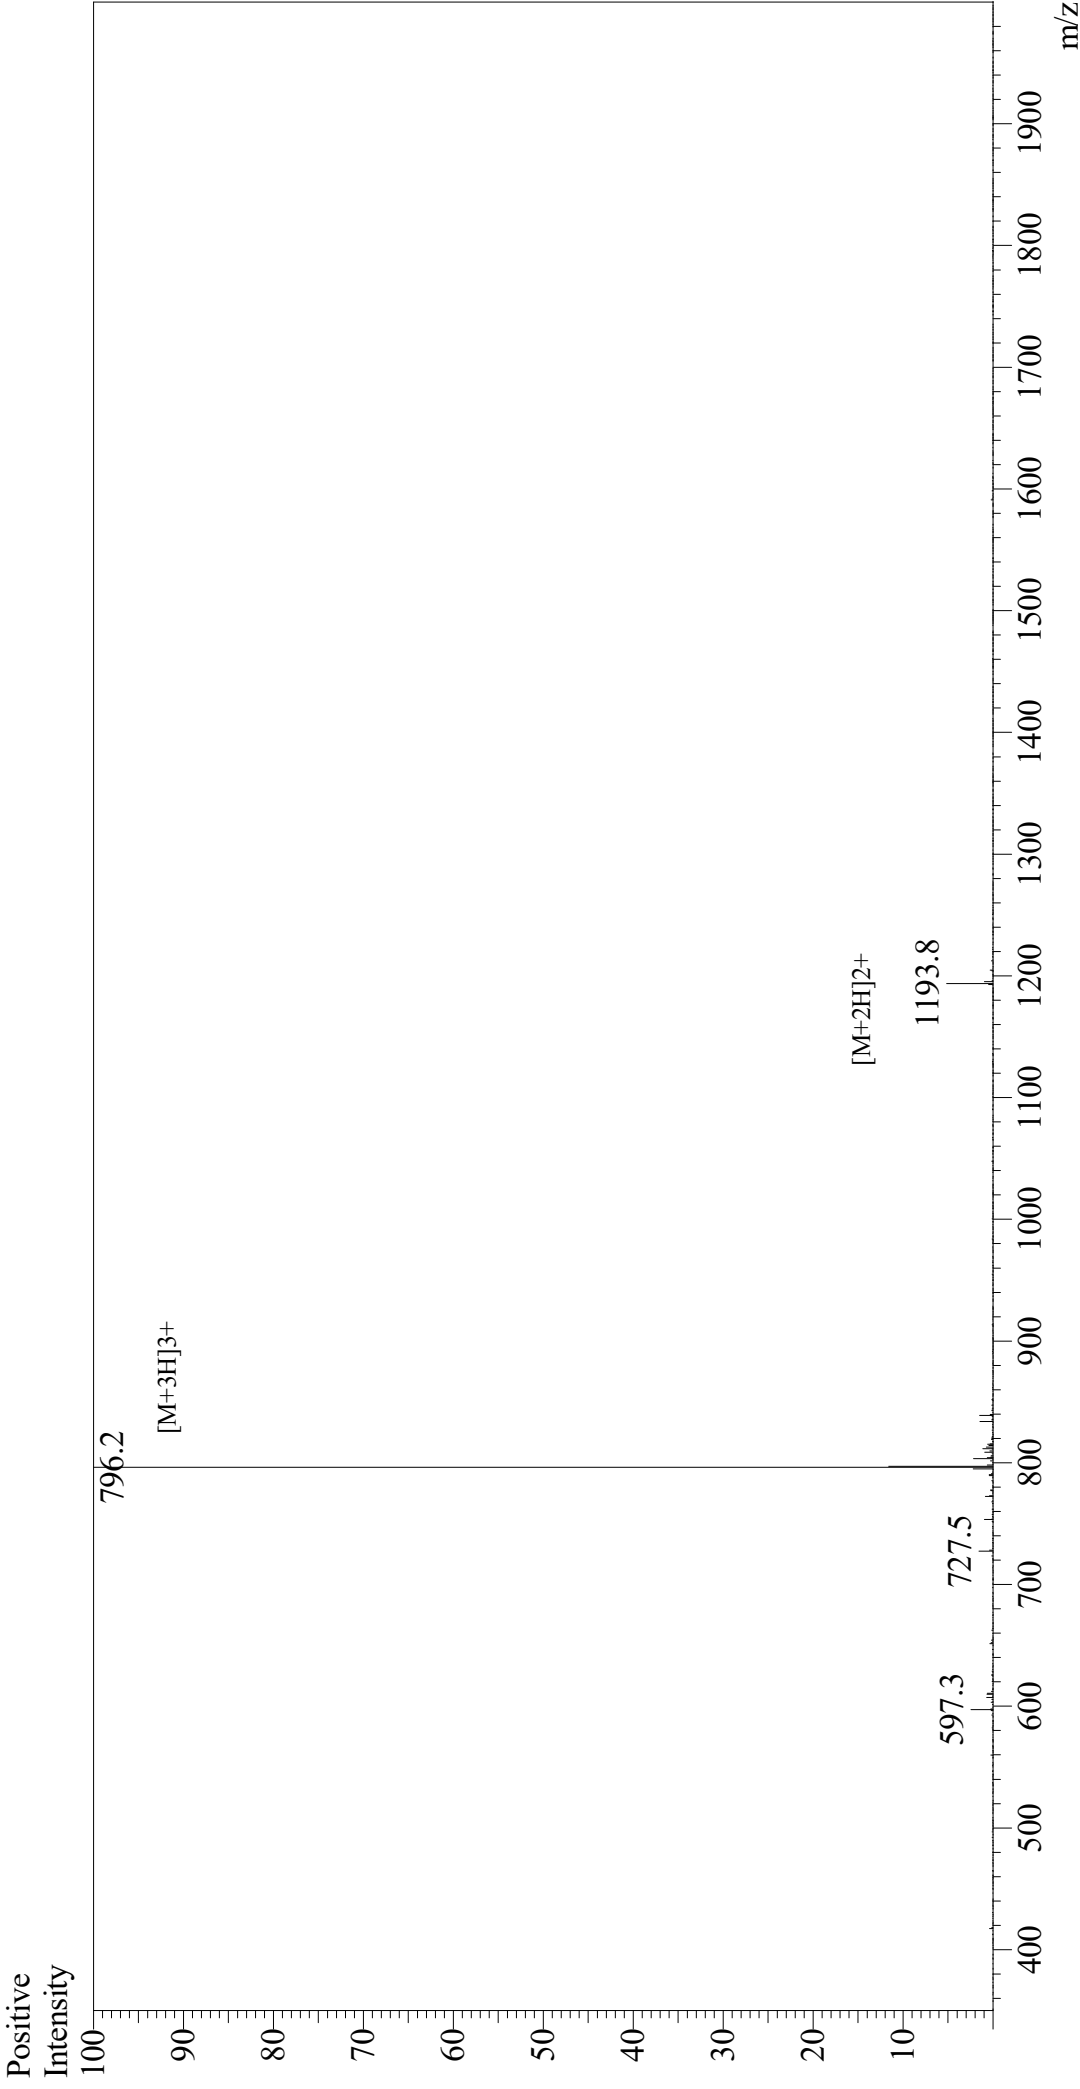

Sample Information  
Month-Day Processed : 08/30/21  
Time Processed : 10:23:21  
Injection Volume : 0.2  
Sample Name : CoV1\_S\_FP2  
Sample ID : U083MGG030-3  
Theoretical MW : 2385.73  
Observed MW : 2385.6

Interface : ESI  
Nebulizing Gas Flow : 1.5L/min  
CDL Temp : 250  
Block Temp : 200

Equipment : ZJ21010035  
Interface Bias : +4.5 kV  
Drying Gas Flow : 5 L/min  
T.Flow : 0.2 ml/min  
B.conc : 50%H2O/50%MeOH

Sample Name : Fusion Peptide 1  
 Sample ID : U1200FK090-3  
 Time Processed: 5:45:03  
 Year-Month-Day: 2020/12/22

Pump A : 0.065% trifluoroacetic in 100% water (v/v)  
 Pump B : 0.05% trifluoroacetic in 100% acetonitrile (v/v)  
 Total Flow: 1 ml/min  
 <<Detector A>>  
 Wavelength Ch1 : 220 nm

<<LC Time Program>>

| Time  | Module     | Command         | Value | Comment |
|-------|------------|-----------------|-------|---------|
| 0.01  | Pumps      | Solvent B Conc. | 5     |         |
| 25.00 | Pumps      | Solvent B Conc. | 65    |         |
| 25.01 | Pumps      | Solvent B Conc. | 95    |         |
| 27.00 | Pumps      | Solvent B Conc. | 95    |         |
| 27.01 | Pumps      | Solvent B Conc. | 5     |         |
| 33.00 | Pumps      | Solvent B Conc. | 5     |         |
| 33.01 | Controller | Stop            |       |         |

<<Column Performance>>

<Detector A>  
 Column : Inertsil ODS-3 4.6 x 250 mm  
 Equipment: ZJ19010015

<Chromatogram>

mV

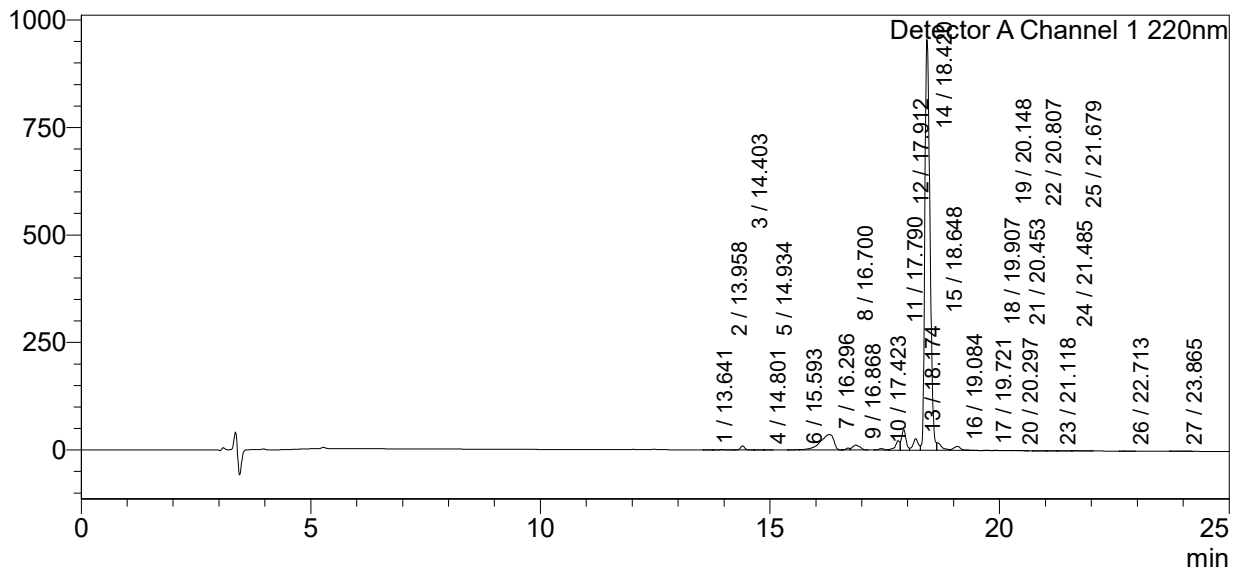

<Peak Table>

Detector A Channel 1 220nm

| Peak# | Ret. Time | Area    | Height | Area%  |
|-------|-----------|---------|--------|--------|
| 1     | 13.641    | 549     | 71     | 0.006  |
| 2     | 13.958    | 5769    | 573    | 0.062  |
| 3     | 14.403    | 59162   | 9554   | 0.633  |
| 4     | 14.801    | 1242    | 174    | 0.013  |
| 5     | 14.934    | 1901    | 263    | 0.020  |
| 6     | 15.593    | 6414    | 792    | 0.069  |
| 7     | 16.296    | 739070  | 35992  | 7.911  |
| 8     | 16.700    | 27938   | 4589   | 0.299  |
| 9     | 16.868    | 130079  | 11559  | 1.392  |
| 10    | 17.423    | 31077   | 3665   | 0.333  |
| 11    | 17.790    | 150201  | 22176  | 1.608  |
| 12    | 17.912    | 322498  | 47775  | 3.452  |
| 13    | 18.174    | 214324  | 26783  | 2.294  |
| 14    | 18.420    | 7383210 | 955236 | 79.030 |

| Peak# | Ret. Time | Area    | Height  | Area%   |
|-------|-----------|---------|---------|---------|
| 15    | 18.648    | 127048  | 17223   | 1.360   |
| 16    | 19.084    | 107560  | 9371    | 1.151   |
| 17    | 19.721    | 5330    | 874     | 0.057   |
| 18    | 19.907    | 3602    | 610     | 0.039   |
| 19    | 20.148    | 1669    | 196     | 0.018   |
| 20    | 20.297    | 1323    | 194     | 0.014   |
| 21    | 20.453    | 3525    | 451     | 0.038   |
| 22    | 20.807    | 1712    | 276     | 0.018   |
| 23    | 21.118    | 1211    | 118     | 0.013   |
| 24    | 21.485    | 5821    | 399     | 0.062   |
| 25    | 21.679    | 6498    | 570     | 0.070   |
| 26    | 22.713    | 1989    | 266     | 0.021   |
| 27    | 23.865    | 1518    | 139     | 0.016   |
| Total |           | 9342241 | 1149889 | 100.000 |



# Mass Spectrum

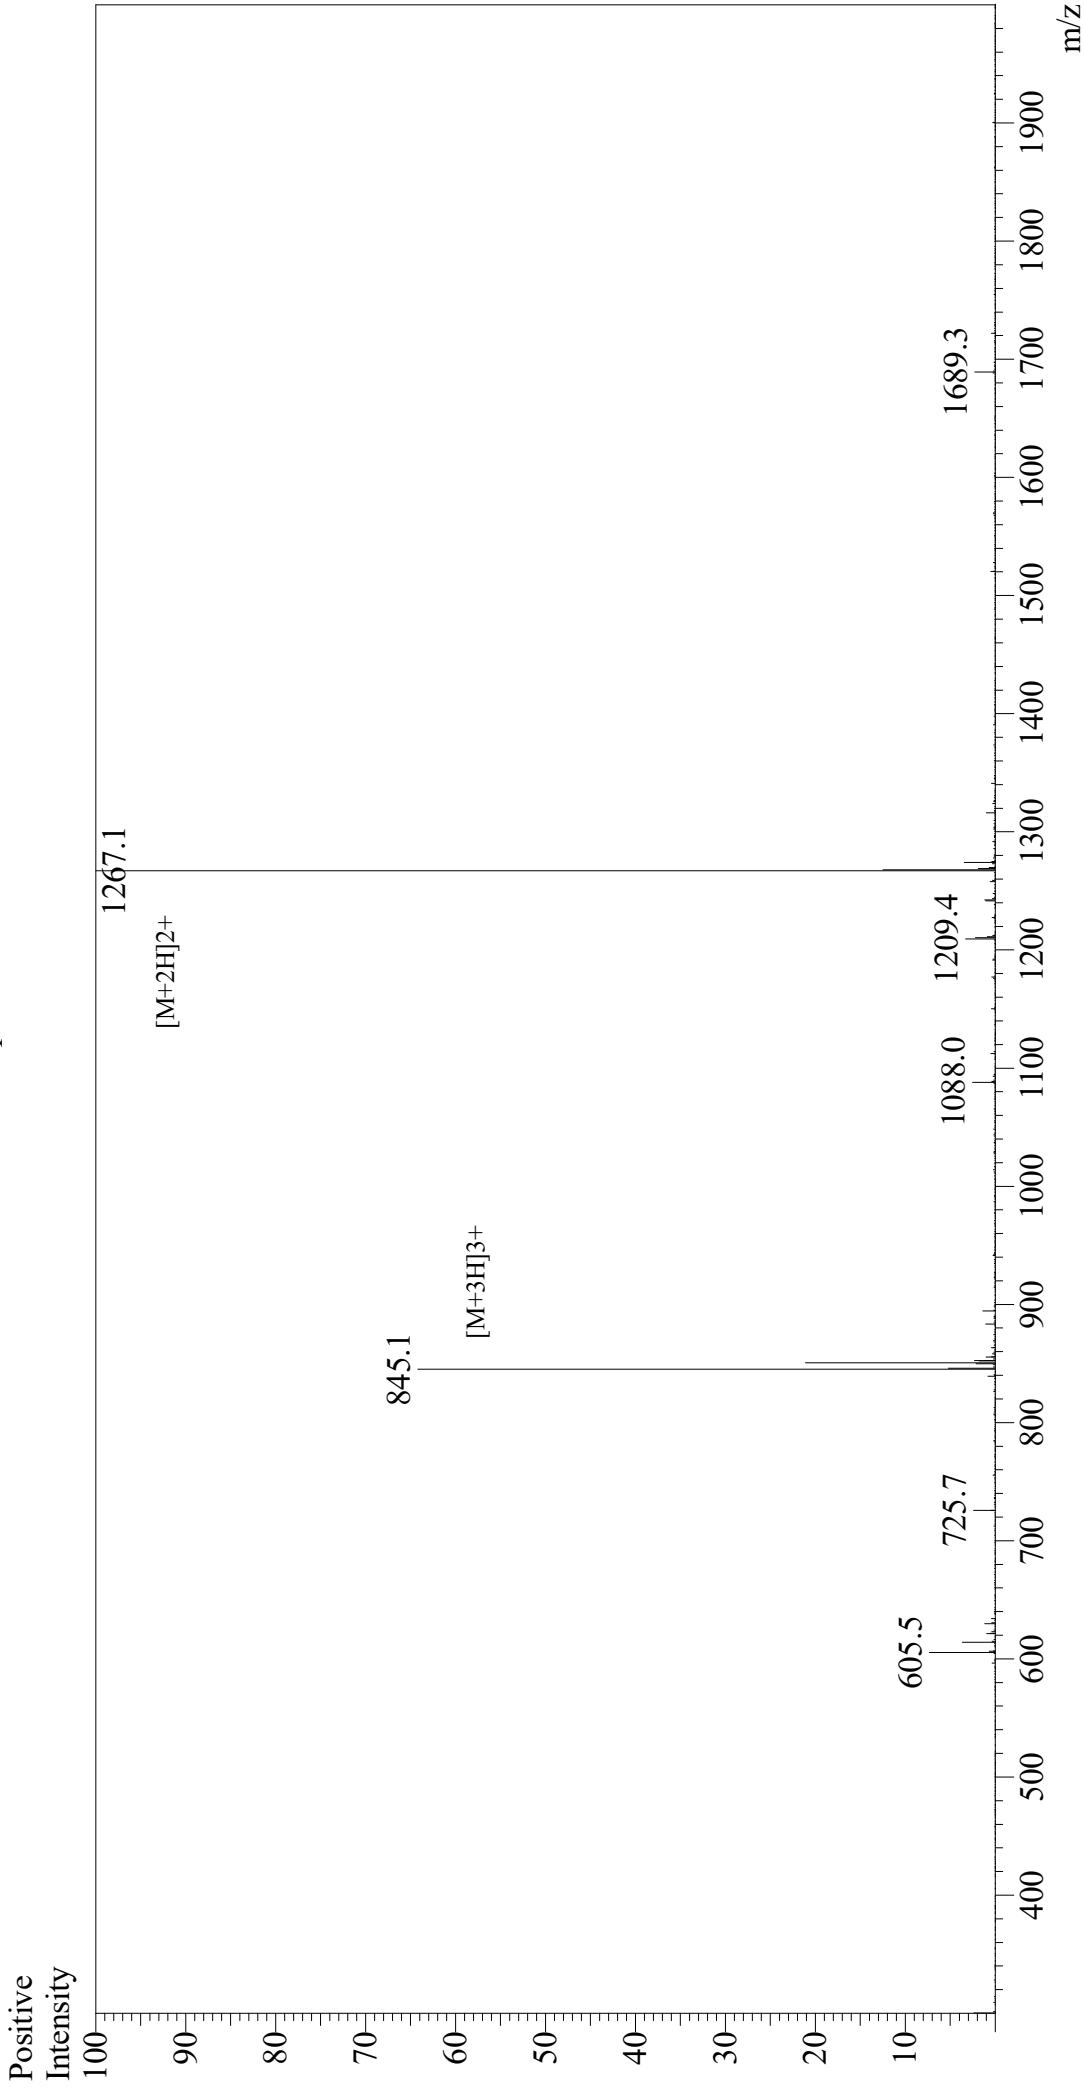

Sample Information  
Month-Day Processed : 12/21/20  
Time Processed : 8:15:42 PM  
Injection Volume : 0.4  
Sample Name : Fusion Peptide 1  
Sample ID : U1200FK090-3  
Theoretical MW : 2532.90  
Observed MW : 2532.2

Interface : ESI  
Nebulizing Gas Flow : 1.5L/min  
CDL Temp : 250  
Block Temp : 200

Equipment : GK11010007  
Interface Bias : +4.5 kV  
Drying Gas Flow : 5 L/min  
T.Flow : 0.2 ml/min  
B.conc : 50% H2O/50% MeOH

Sample Name : Fusion Peptide 2  
 Sample ID : U1200FK090-5  
 Time Processed : 1:23:04 AM  
 Month-Day-Year Processed : 12/05/2020

Pump A : 0.065% trifluoroacetic in 100% water (v/v)  
 Pump B : 0.05% trifluoroacetic in 100% acetonitrile (v/v)  
 Total Flow: 1 ml/min  
 Wavelength: 220 nm

<<LC Time Program>>

| Time  | Module     | Command | Value |
|-------|------------|---------|-------|
| 0.01  | Pumps      | B.Conc  | 5     |
| 25.00 | Pumps      | B.Conc  | 65    |
| 25.01 | Pumps      | B.Conc  | 95    |
| 27.00 | Pumps      | B.Conc  | 95    |
| 27.01 | Pumps      | B.Conc  | 5     |
| 35.00 | Pumps      | B.Conc  | 5     |
| 35.00 | Controller | Stop    |       |

<<Column Performance>>

<Detector A>

Column : Inertsil ODS-3 4.6 x 250 mm  
 Equipment: ZJ19010324

<Chromatogram>

mV

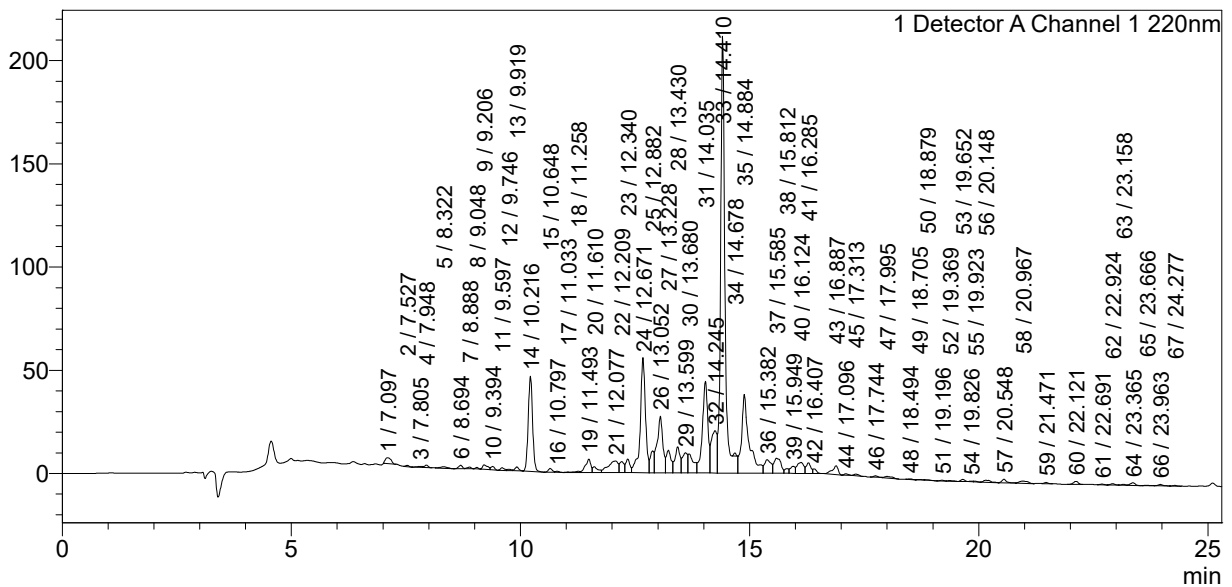

<Peak Table>

Detector A Channel 1 220nm

| Peak# | Ret. Time | Area   | Height | Area% |
|-------|-----------|--------|--------|-------|
| 1     | 7.097     | 25071  | 2866   | 0.549 |
| 2     | 7.527     | 2759   | 640    | 0.060 |
| 3     | 7.805     | 4382   | 508    | 0.096 |
| 4     | 7.948     | 7114   | 1299   | 0.156 |
| 5     | 8.322     | 9436   | 823    | 0.206 |
| 6     | 8.694     | 10297  | 1739   | 0.225 |
| 7     | 8.888     | 5162   | 819    | 0.113 |
| 8     | 9.048     | 3271   | 753    | 0.072 |
| 9     | 9.206     | 17137  | 2157   | 0.375 |
| 10    | 9.394     | 9263   | 1655   | 0.203 |
| 11    | 9.597     | 7804   | 1281   | 0.171 |
| 12    | 9.746     | 4343   | 611    | 0.095 |
| 13    | 9.919     | 11151  | 1921   | 0.244 |
| 14    | 10.216    | 306857 | 46106  | 6.715 |
| 15    | 10.648    | 11130  | 1835   | 0.244 |
| 16    | 10.797    | 2645   | 479    | 0.058 |

| Peak# | Ret. Time | Area    | Height | Area%   |
|-------|-----------|---------|--------|---------|
| 17    | 11.033    | 1075    | 212    | 0.024   |
| 18    | 11.258    | 4443    | 569    | 0.097   |
| 19    | 11.493    | 52199   | 6473   | 1.142   |
| 20    | 11.610    | 21771   | 2789   | 0.476   |
| 21    | 12.077    | 86378   | 5624   | 1.890   |
| 22    | 12.209    | 35365   | 5335   | 0.774   |
| 23    | 12.340    | 42018   | 6583   | 0.920   |
| 24    | 12.671    | 445420  | 55747  | 9.747   |
| 25    | 12.882    | 60282   | 10572  | 1.319   |
| 26    | 13.052    | 239662  | 27373  | 5.245   |
| 27    | 13.228    | 78111   | 10951  | 1.709   |
| 28    | 13.430    | 97129   | 12619  | 2.126   |
| 29    | 13.599    | 74494   | 9732   | 1.630   |
| 30    | 13.680    | 78610   | 9146   | 1.720   |
| 31    | 14.035    | 366917  | 44330  | 8.029   |
| 32    | 14.245    | 173797  | 20473  | 3.803   |
| 33    | 14.410    | 1393324 | 211646 | 30.491  |
| 34    | 14.678    | 5388    | 1544   | 0.118   |
| 35    | 14.884    | 436584  | 38086  | 9.554   |
| 36    | 15.382    | 65499   | 6568   | 1.433   |
| 37    | 15.585    | 78243   | 7283   | 1.712   |
| 38    | 15.812    | 13498   | 2288   | 0.295   |
| 39    | 15.949    | 24610   | 3419   | 0.539   |
| 40    | 16.124    | 53929   | 5306   | 1.180   |
| 41    | 16.285    | 36565   | 5136   | 0.800   |
| 42    | 16.407    | 11502   | 2214   | 0.252   |
| 43    | 16.887    | 37903   | 4330   | 0.829   |
| 44    | 17.096    | 4476    | 708    | 0.098   |
| 45    | 17.313    | 5687    | 784    | 0.124   |
| 46    | 17.744    | 4244    | 674    | 0.093   |
| 47    | 17.995    | 9268    | 743    | 0.203   |
| 48    | 18.494    | 2197    | 353    | 0.048   |
| 49    | 18.705    | 1037    | 182    | 0.023   |
| 50    | 18.879    | 1386    | 186    | 0.030   |
| 51    | 19.196    | 2589    | 390    | 0.057   |
| 52    | 19.369    | 2654    | 336    | 0.058   |
| 53    | 19.652    | 5724    | 983    | 0.125   |
| 54    | 19.826    | 1376    | 275    | 0.030   |
| 55    | 19.923    | 1525    | 326    | 0.033   |
| 56    | 20.148    | 10713   | 966    | 0.234   |
| 57    | 20.548    | 10939   | 1684   | 0.239   |
| 58    | 20.967    | 12977   | 1077   | 0.284   |
| 59    | 21.471    | 3559    | 591    | 0.078   |
| 60    | 22.121    | 10865   | 1497   | 0.238   |
| 61    | 22.691    | 2196    | 363    | 0.048   |
| 62    | 22.924    | 4003    | 620    | 0.088   |
| 63    | 23.158    | 2487    | 398    | 0.054   |
| 64    | 23.365    | 9370    | 1260   | 0.205   |
| 65    | 23.666    | 1020    | 134    | 0.022   |
| 66    | 23.963    | 4921    | 677    | 0.108   |
| 67    | 24.277    | 1900    | 291    | 0.042   |
| Total |           | 4569652 | 597339 | 100.000 |

# Mass Spectrum

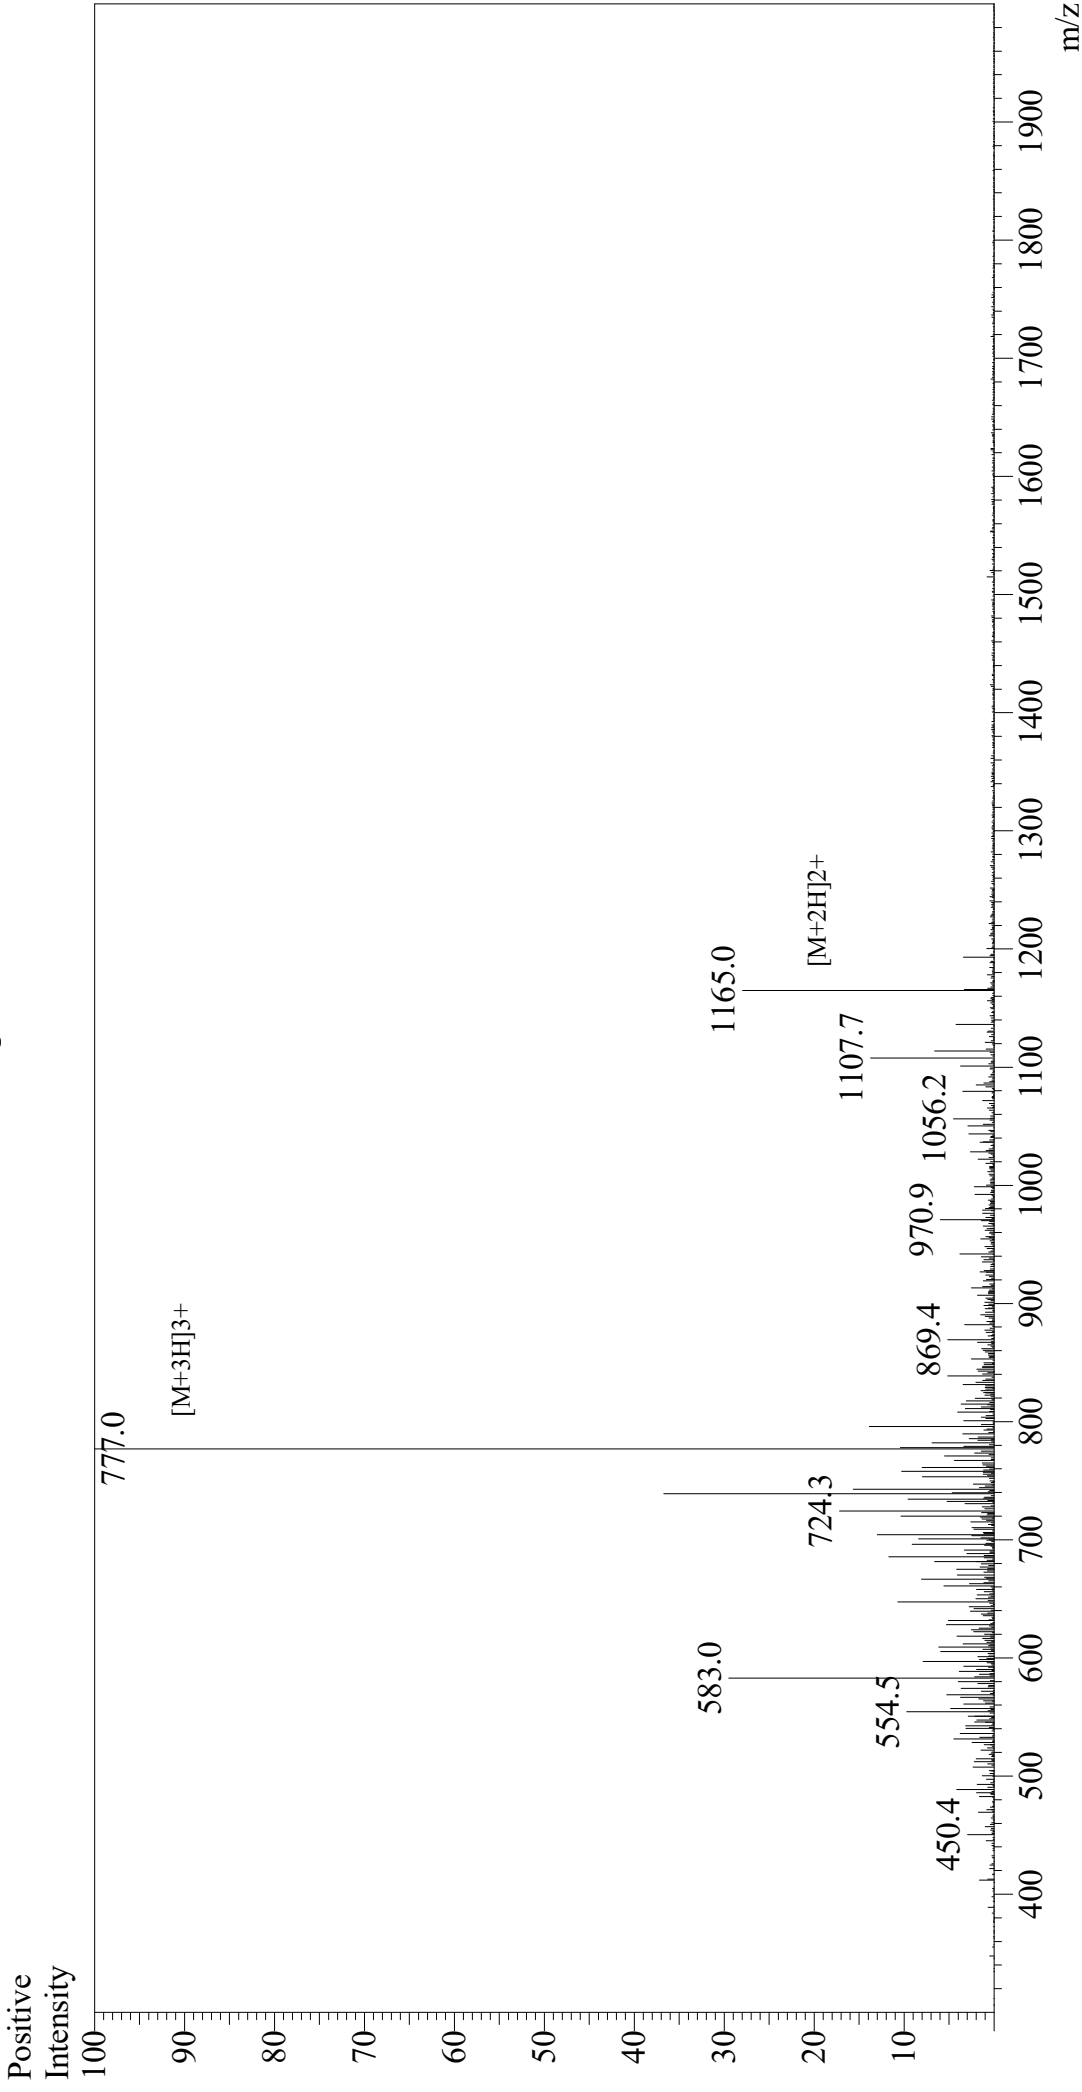

Sample Information  
Month-Day Processed : 12/11/20  
Time Processed : 5:15:54 PM  
Injection Volume : 0.4  
Sample Name : Fusion Peptide 2  
Sample ID : U1200FK090-5  
Theoretical MW : 2328.68  
Observed MW : 2328.0

Interface : ESI  
Nebulizing Gas Flow : 1.5L/min  
CDL Temp : 250  
Block Temp : 200

Equipment : GK11010007  
Interface Bias : +4.5 kV  
Drying Gas Flow : 5 L/min  
T.Flow : 0.2 ml/min  
B.conc : 50% H<sub>2</sub>O/50% MeOH

# Applied Biosystems Voyager System 1150

Voyager Spec #1=>AdvBC(2,0,5,0,1)=>NR(22,00)=>AdvBC(2,0,5,0,1)[BP = 4449.2, 3839]

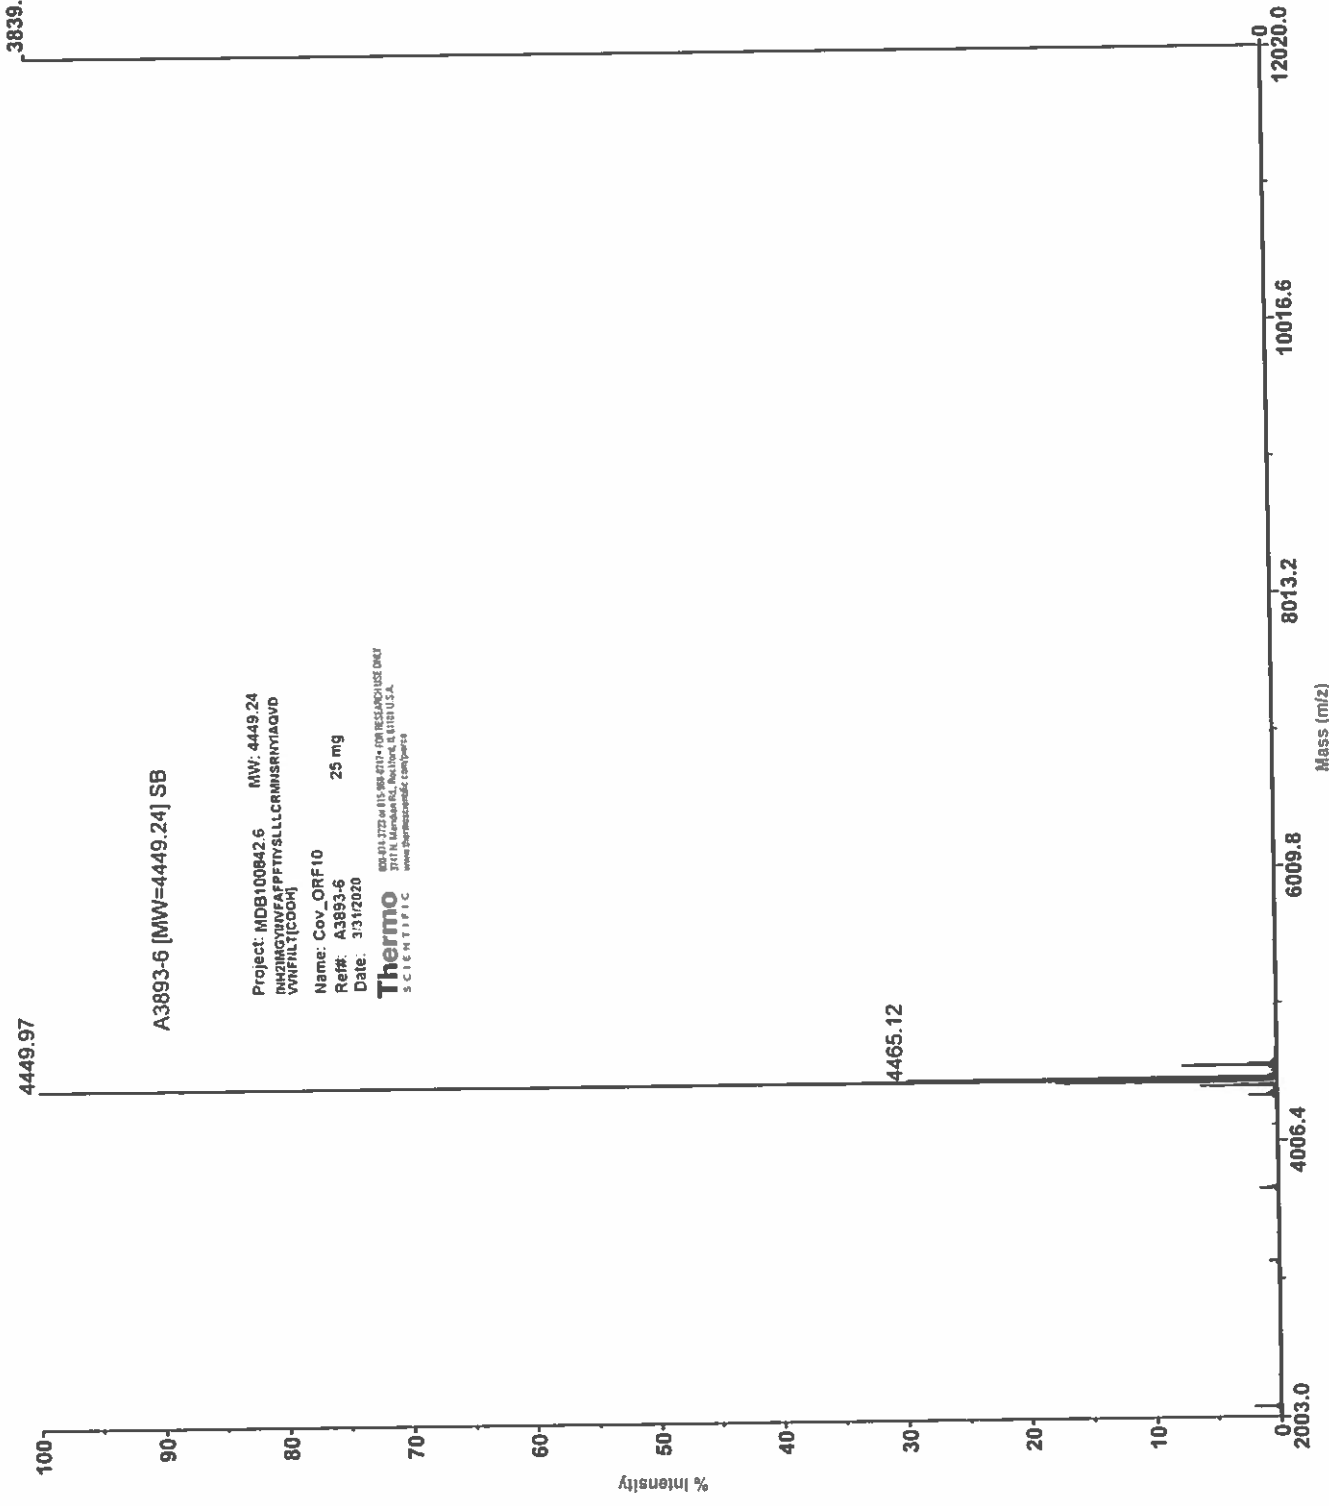

A3893-6 [MW=4449.24] SB

Project: MDB100842.6 MW: 4449.24  
 INH2MGVWVFAFFFTYVLLLCRMNSRYIAQVD  
 VVNFILYTCOOA  
 Name: CoV\_ORF10 25 mg  
 Ref#: A3893-6  
 Date: 3/3/2020

**Thermo**  
 SCIENTIFIC  
 800.31.2722 or 615.984.0174 FOR RESEARCH USE ONLY  
 3717 N. Ardenway Rd., Northvale, NJ 07647 U.S.A.  
 www.thermoscientific.com/pep1

Mode of operation: Linear  
 Extraction mode: Delayed  
 Polarity: Negative  
 Acquisition control: Manual

Accelerating voltage: 20000 V  
 Grid voltage: 94%  
 Guide wire 0: 0.05%  
 Extraction delay time: 500 nsec

Acquisition mass range: 2000 - 12000 Da  
 Number of laser shots: 100/spectrum  
 Laser intensity: 2487  
 Laser Rep Rate: 3.0 Hz  
 Calibration type: Default  
 Calibration matrix: a-Cyano-4-hydroxycinnamic acid  
 Low mass gate: Off

Digitizer start time: 28.428  
 Bin size: 2 nsec  
 Number of data points: 20500  
 Vertical scale: 200 mV  
 Vertical offset: 0%  
 Input bandwidth: 150 MHz

Sample well: 24  
 Plate ID: 100 WELL PLATE  
 Serial number: 1150  
 Instrument name: Voyager-DE  
 Plate type filename: C:\VOYAGER\100 well plate.plt  
 Lab name: PE Biosystems

Absolute x-position: 16821.4  
 Absolute y-position: 35822.2  
 Relative x-position: -6.07651  
 Relative y-position: -1325.32  
 Shots in spectrum: 12  
 Source pressure: 1.66e-007  
 Mirror pressure: 0  
 TC2 pressure: 0.01982  
 TIS gate width: 30  
 TIS flight length: 940

Sample Name :NSP6\_90-112 **Please read 90-112 as 91-112.**  
 Sample ID :U521TFI050-14  
 Time Processed: 2:28:28 PM  
 Month-Day-Year Processed :11/13/2020

Pump A : 0.065% trifluoroacetic in 100% water (v/v)  
 Pump B : 0.05% trifluoroacetic in 100% acetonitrile (v/v)  
 Total Flow:1 ml/min  
 Wavelength:220 nm

<<LC Time Program>>

| Time  | Module     | Command         | Value |
|-------|------------|-----------------|-------|
| 0.01  | Pumps      | Solvent B Conc. | 5     |
| 25.00 | Pumps      | Solvent B Conc. | 65    |
| 25.01 | Pumps      | Solvent B Conc. | 95    |
| 27.00 | Pumps      | Solvent B Conc. | 95    |
| 27.01 | Pumps      | Solvent B Conc. | 5     |
| 33.00 | Pumps      | Solvent B Conc. | 5     |
| 33.00 | Controller | Stop            |       |

<<Column Performance>>

<Detector A>

Column : Inertsil ODS-3 4.6 x 250 mm  
 Equipment:ZJ19010325

<Chromatogram>

mV

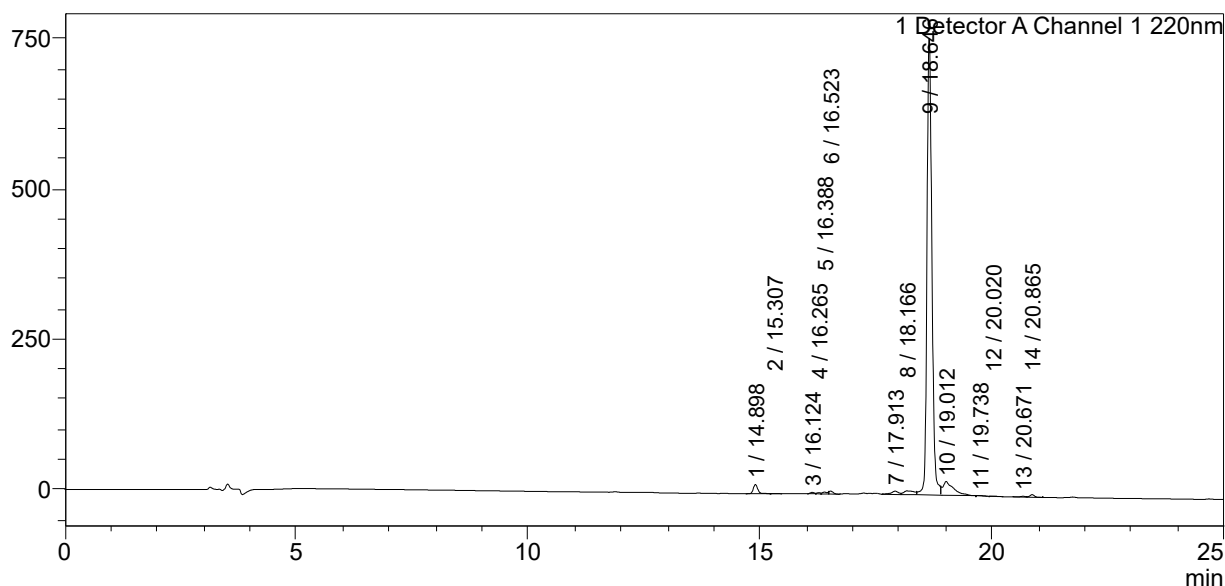

<Peak Table>

Detector A Channel 1 220nm

| Peak# | Ret. Time | Area    | Height | Area%   |
|-------|-----------|---------|--------|---------|
| 1     | 14.898    | 101465  | 15237  | 1.600   |
| 2     | 15.307    | 1458    | 243    | 0.023   |
| 3     | 16.124    | 13009   | 2192   | 0.205   |
| 4     | 16.265    | 10826   | 1923   | 0.171   |
| 5     | 16.388    | 24999   | 3010   | 0.394   |
| 6     | 16.523    | 27187   | 4826   | 0.429   |
| 7     | 17.913    | 60478   | 5386   | 0.953   |
| 8     | 18.166    | 95088   | 6172   | 1.499   |
| 9     | 18.646    | 5615644 | 759272 | 88.528  |
| 10    | 19.012    | 347975  | 22686  | 5.486   |
| 11    | 19.738    | 3828    | 521    | 0.060   |
| 12    | 20.020    | 3151    | 433    | 0.050   |
| 13    | 20.671    | 10037   | 1245   | 0.158   |
| 14    | 20.865    | 28191   | 4248   | 0.444   |
| Total |           | 6343336 | 827395 | 100.000 |

# Mass Spectrum

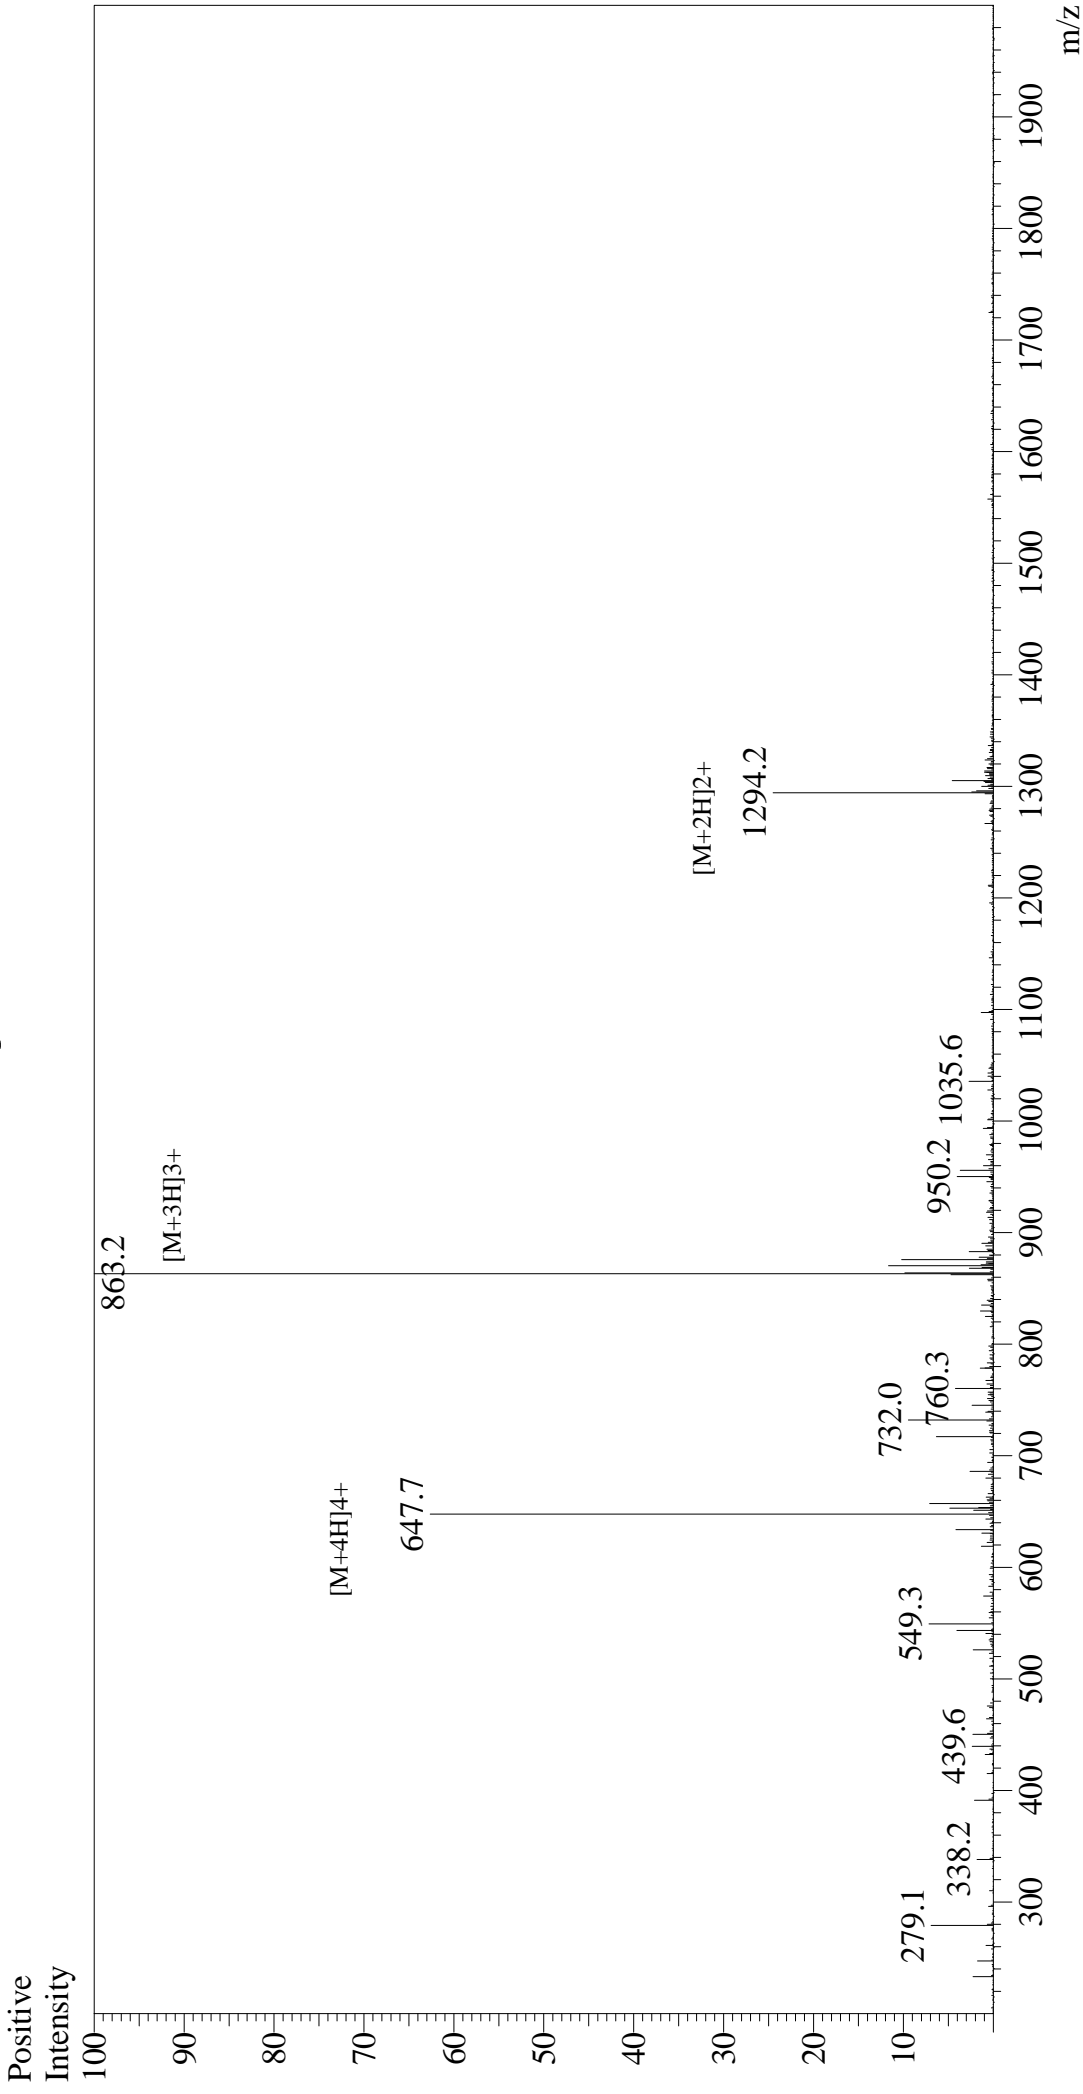

Sample Information  
Month-Day Processed : 11/13/20  
Time Processed : 1:12:19  
Injection Volume : 0.5  
Sample Name : NSP6\_90-112  
Sample ID : U521TFI050-14  
Theoretical MW : 2587.10  
Observed MW : 2586.6

Interface : ESI  
Nebulizing Gas Flow : 1.5L/min  
CDL Temp : 250  
Block Temp : 200

Equipment : GK11010007  
Interface Bias : +4.5 kV  
Drying Gas Flow : 5 L/min  
T.Flow : 0.2 ml/min  
B.conc : 50% H2O/50% MeOH

Sample Name :NSP11\_CoV1  
 Sample ID :U083MGG030-5  
 Time Processed :9:41:05 PM  
 Month-Day-Year Processed :08/26/2021

Pump A : 0.065% trifluoroacetic in 100% water (v/v)  
 Pump B : 0.05% trifluoroacetic in 100% acetonitrile (v/v)  
 Total Flow:1 ml/min  
 Wavelength:220 nm

<<LC Time Program>>

| Time  | Module     | Command | Value |
|-------|------------|---------|-------|
| 0.01  | Pumps      | B.Conc  | 5     |
| 25.00 | Pumps      | B.Conc  | 65    |
| 25.01 | Pumps      | B.Conc  | 95    |
| 27.00 | Pumps      | B.Conc  | 95    |
| 27.01 | Pumps      | B.Conc  | 5     |
| 35.00 | Pumps      | B.Conc  | 5     |
| 35.01 | Controller | Stop    |       |

<<Column Performance>>

<Detector A>

Column :Inertsil ODS-3 4.6 x 250 mm  
 Equipment: ZJ21010026

<Chromatogram>

mV

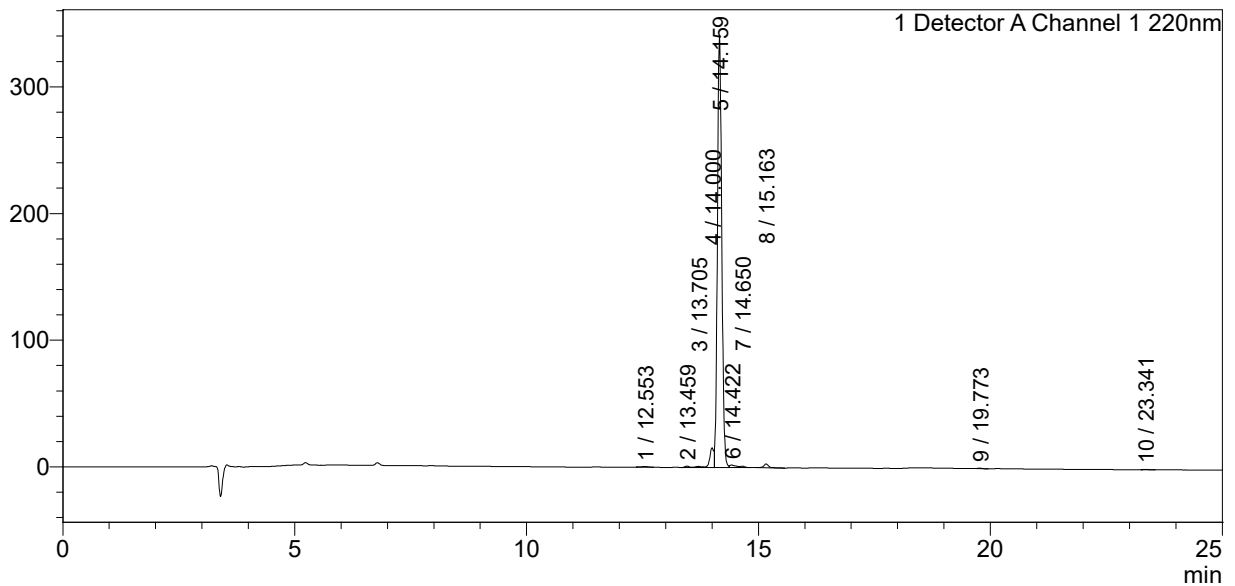

<Peak Table>

Detector A Channel 1 220nm

| Peak# | Ret. Time | Area    | Height | Area%   |
|-------|-----------|---------|--------|---------|
| 1     | 12.553    | 4698    | 491    | 0.195   |
| 2     | 13.459    | 6863    | 1130   | 0.285   |
| 3     | 13.705    | 7762    | 882    | 0.323   |
| 4     | 14.000    | 99865   | 15603  | 4.149   |
| 5     | 14.159    | 2235200 | 337815 | 92.872  |
| 6     | 14.422    | 18242   | 1969   | 0.758   |
| 7     | 14.650    | 7397    | 1061   | 0.307   |
| 8     | 15.163    | 22114   | 3009   | 0.919   |
| 9     | 19.773    | 2544    | 439    | 0.106   |
| 10    | 23.341    | 2070    | 319    | 0.086   |
| Total |           | 2406755 | 362718 | 100.000 |



# Mass Spectrum

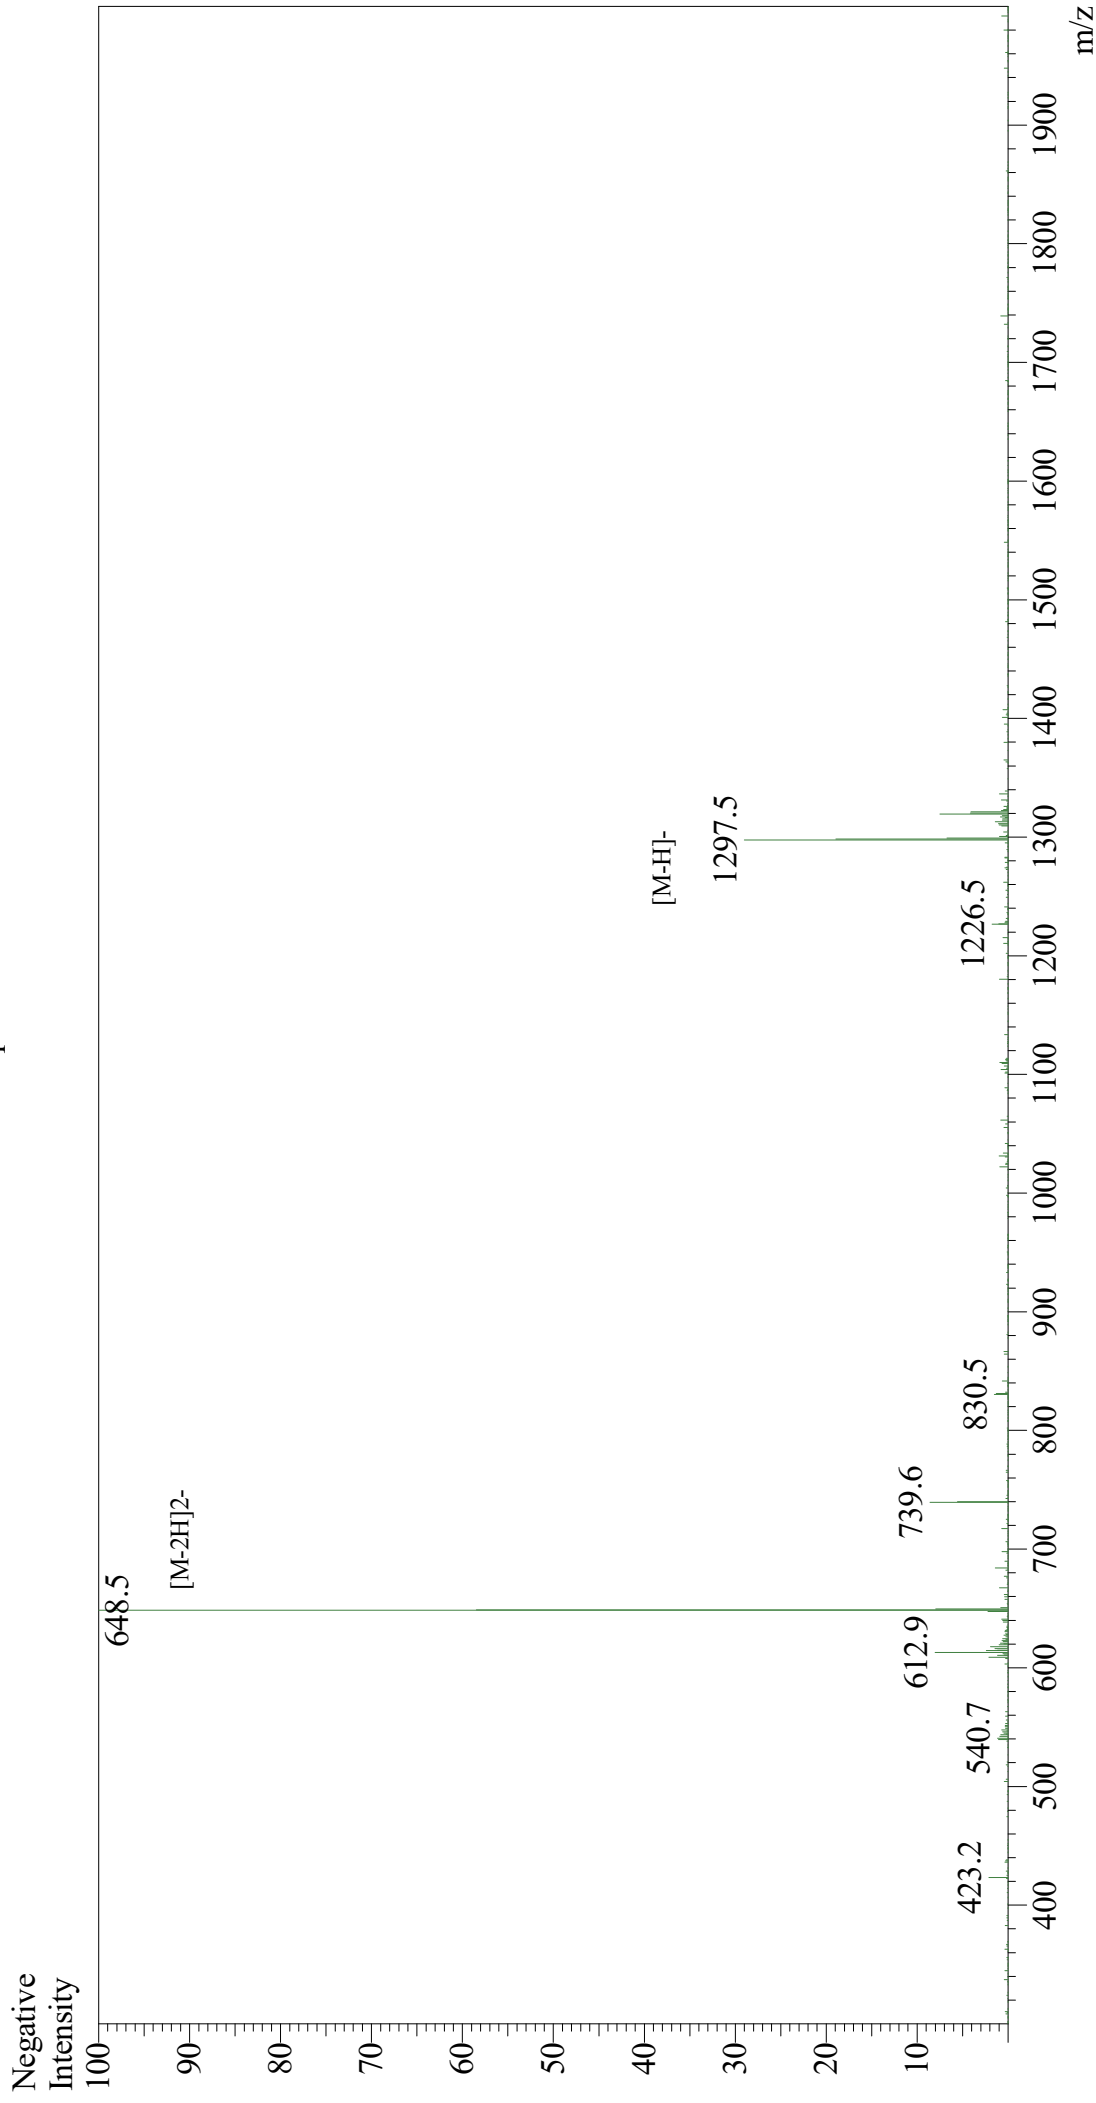

## Sample Information

Month-Day Processed : 08/26/21  
Time Processed : 19:02:05  
Injection Volume : 0.2  
Sample Name : NSP11\_CoV1  
Sample ID : U083MGG030-5  
Theoretical MW : 1299.39  
Observed MW : 1299.0

Interface : ESI  
Nebulizing Gas Flow : 1.5L/min  
CDL Temp : 250  
Block Temp : 200

Equipment : ZJ21010035  
Interface Bias : -3.5 kV  
Drying Gas Flow : 5 L/min  
T.Flow : 0.2 ml/min  
B.conc : 50%H2O/50%MeOH

Sample Name: NSP11  
 Sample ID: U4944FD210-1  
 Time Processed : 22:23:11  
 Month-Day-Year Processed : 05/18/2020

Pump A : 0.065% trifluoroacetic in 100% water (v/v)  
 Pump B : 0.05% trifluoroacetic in 100% acetonitrile (v/v)  
 Total Flow:1 ml/min  
 Wavelength:220 nm  
 <<LC Time Program>>

| Time  | Module     | Command      | Value |
|-------|------------|--------------|-------|
| 0.01  | Pumps      | Pump B Conc. | 5     |
| 25.00 | Pumps      | Pump B Conc. | 65    |
| 25.01 | Pumps      | Pump B Conc. | 95    |
| 27.00 | Pumps      | Pump B Conc. | 95    |
| 27.01 | Pumps      | Pump B Conc. | 5     |
| 32.00 | Pumps      | Pump B Conc. | 5     |
| 32.01 | Controller | Stop         |       |

<<Column Performance>>

<Detector A>

Column :Inertsil ODS-3 4.6 x 250 mm  
 Equipment:GK12010012

### <Chromatogram>

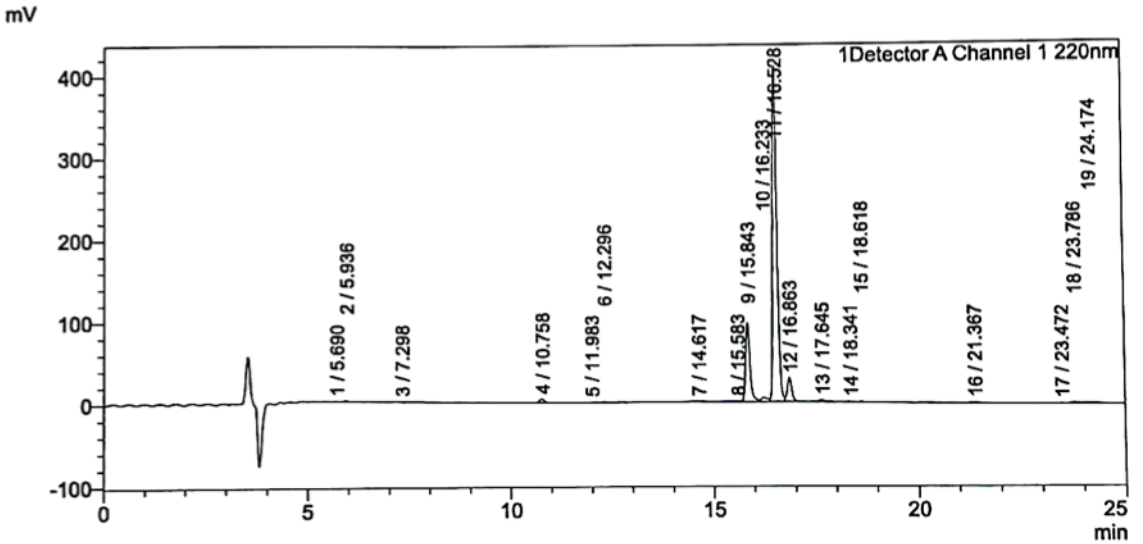

### <Peak Table>

Detector A Channel 1 220nm

| Peak# | Ret. Time | Area    | Height | Area%  |
|-------|-----------|---------|--------|--------|
| 1     | 5.690     | 2349    | 339    | 0.056  |
| 2     | 5.936     | 4871    | 835    | 0.117  |
| 3     | 7.298     | 1508    | 363    | 0.036  |
| 4     | 10.758    | 31706   | 3942   | 0.763  |
| 5     | 11.983    | 4541    | 328    | 0.109  |
| 6     | 12.296    | 5427    | 502    | 0.131  |
| 7     | 14.617    | 4272    | 482    | 0.103  |
| 8     | 15.583    | 6546    | 657    | 0.157  |
| 9     | 15.843    | 704925  | 95447  | 16.955 |
| 10    | 16.233    | 54967   | 5099   | 1.322  |
| 11    | 16.528    | 3029858 | 408391 | 72.875 |
| 12    | 16.863    | 215824  | 28991  | 5.191  |
| 13    | 17.645    | 16702   | 2122   | 0.402  |
| 14    | 18.341    | 2876    | 443    | 0.069  |
| 15    | 18.618    | 5269    | 788    | 0.127  |

| Peak# | Ret. Time | Area    | Height | Area%   |
|-------|-----------|---------|--------|---------|
| 16    | 21.367    | 10405   | 999    | 0.250   |
| 17    | 23.472    | 4265    | 526    | 0.103   |
| 18    | 23.786    | 21649   | 1860   | 0.521   |
| 19    | 24.174    | 29680   | 1421   | 0.714   |
| Total |           | 4157638 | 553536 | 100.000 |

# Mass Spectrum

Positive Intensity

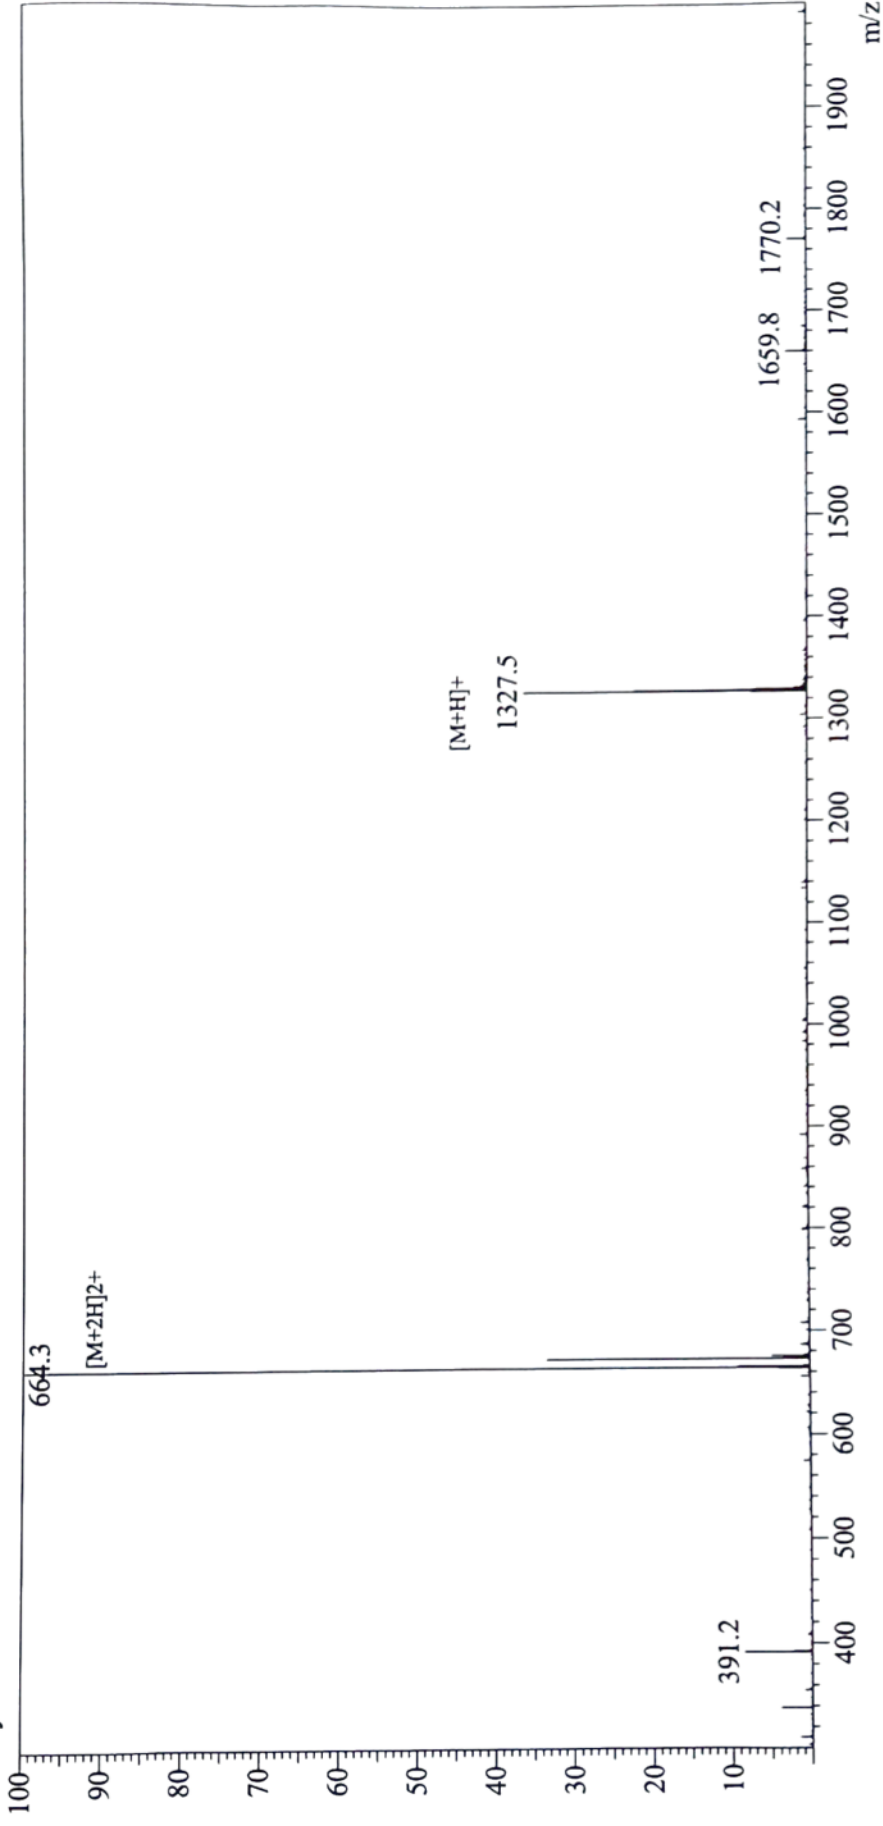

## Sample Information

Acquired by : Gary  
Month-Day Processed : 05/19/20  
Time Processed : 06:59:54 AM  
Injection Volume : 0.3  
Sample Name : NSP11  
Sample ID : U4944FD210-1  
Theoretical MW : 1326.42  
Observed MW : 1326.6

Interface : ESI  
Nebulizing Gas Flow : 1.5L/min  
CDL Temp : 250  
Block Temp : 200

Equipment : GK11010007  
Interface Bias : +4.5 kV  
Drying Gas Flow : 5 L/min  
T.Flow : 0.2 ml/min  
B.conc : 50%aH2O/50%MeOH
